# Supplementary material for: Advances in representing interactive methane in ModelE2-YIBs(version 1.1)
Source: Copernicus journal article supplement (doi:10.5194/gmd-2018-85), 2018-05-18
Supplement: Supplementary file 1 [file dataset1_numerical_data_for_plots.xlsx]

## Sheet: README
	This file contains the numerical data plotted in Figures 1-5.
	Contents of file (by tab):
	Fig1: Simulated annual-mean surface methane mixing ratio (ppbv) for each model grid cell for simulation E2005.
	The top row indicates the longitude (degrees E) and the first column indicates the latitude (degrees N).
	These data are plotted in Figure 1.
	Fig3_mean: Simulated monthly-mean surface methane mixing ratio (ppbv) for simulation E2005 at the 50 locations
	corresponding to NOAA ESRL surface measurement stations. Means are calculated over 10 model years. These data are
	plotted in Figure 3. The model data plotted in Figure 2 can be calculated using these data.
	Fig3_sd: Standard deviations of the simulated monthly surface methane mixing ratios (ppbv) for simulation E2005
	at the 50 locations corresponding to NOAA ESRL surface measurement stations. Standard deviations are calculated
	over 10 model years. These data are plotted in Figure 3.
	Fig4: Relative difference (%) between simulated (E2005) and SCIAMACHY annual column-averaged methane concentrations
	for each grid cell. Relative difference = 100 x (model - satellite)/satellite. The top row indicates the longitude (degrees E)
	and the first column indicates the latitude (degrees N). Missing data = -999. These data are plotted in Figure 4.
	Fig5: Simulated annual-mean ozone mixing ratio (ppbv) for simulation E2005 at the 41 locations corresponding to
	the ozonesonde climatology of Tilmes et al. (2012). Data are given for 4 pressures: 90, 200, 500, and 800 hPa.
	The data are organized by latitude of the measurement locations. Missing data = -999. These data are plotted in Figure 5.
	For NOAA ESRL surface methane measurements, see:
	Dlugokencky, E.J., Lang, P.M., Crotwell, A.M., Masarie, K.A., and Crotwell, M.J.: Atmospheric Methane Dry Air Mole Fractions from the NOAA ESRL Carbon Cycle Cooperative Global Air Sampling Network, 1983–2014, Version 2015-08-03, 2015, data path: ftp://aftp.cmdl.noaa.gov/data/trace_gases/ch4/flask/surface/
	For SCIAMACHY methane columns, see:
	(1) Schneising, O., Buchwitz, M., Burrows, J.P., Bovensmann, H., Bergamaschi, P., and Peters, W.: Three years of greenhouse gas column-averaged dry air mole fractions retrieved from satellite - Part 2: Methane, Atmos. Chem. Phys., 9, 443–465, doi: 10.5194/acp-9-443-2009, 2009.
	(2) iup.uni-bremen.de/sciamachy/NIR_NADIR_WFM_DOAS/products/
	For ozonesonde climatology, see:
	Tilmes, S., Lamarque, J.-F., Emmons, L.K., Conley, A., Schultz, M.G., Saunois, M., Thouret, V., Thompson, A.M., Oltmans, S.J., Johnson, B., and Tarasick, D.: Technical Note: Ozonesonde climatology between 1995 and 2011: Description, evaluation and applications, Atmos. Chem. Phys., 12, 7475–7497, doi: 10.5194/acp-12-7475-2012, 2012.

## Sheet: Fig1
lat (degN) \ lon (degE)	-178.75	-176.25	-173.75	-171.25	-168.75	-166.25	-163.75	-161.25	-158.75	-156.25	-153.75	-151.25	-148.75	-146.25	-143.75	-141.25	-138.75	-136.25	-133.75	-131.25	-128.75	-126.25	-123.75	-121.25	-118.75	-116.25	-113.75	-111.25	-108.75	-106.25	-103.75	-101.25	-98.75	-96.25	-93.75	-91.25	-88.75	-86.25	-83.75	-81.25	-78.75	-76.25	-73.75	-71.25	-68.75	-66.25	-63.75	-61.25	-58.75
-89	1734.11	1734.11	1734.11	1734.11	1734.11	1734.11	1734.11	1734.11	1734.11	1734.11	1734.11	1734.11	1734.11	1734.11	1734.11	1734.11	1734.11	1734.11	1734.11	1734.11	1734.11	1734.11	1734.11	1734.11	1734.11	1734.11	1734.11	1734.11	1734.11	1734.11	1734.11	1734.11	1734.11	1734.11	1734.11	1734.11	1734.11	1734.11	1734.11	1734.11	1734.11	1734.11	1734.11	1734.11	1734.11	1734.11	1734.11	1734.11	1734.11
-87	1734.4	1734.15	1734.45	1733.81	1735.09	1733.87	1734.61	1734.08	1734.49	1734.39	1734	1734.64	1733.95	1734.58	1734.02	1734.36	1734.37	1734.09	1734.63	1733.94	1734.5	1734.29	1734.36	1734.42	1734.2	1734.65	1733.95	1734.83	1733.87	1734.8	1734.05	1734.64	1734.48	1734.06	1734.77	1733.82	1734.68	1734.04	1734.34	1734.32	1734.17	1734.38	1734.18	1734.34	1734.23	1734.29	1734.28	1734.23	1734.32
-85	1735.54	1733.52	1735.19	1733.86	1735.63	1734.51	1734.48	1734.58	1734.25	1734.54	1734.24	1734.52	1734.43	1734.42	1734.49	1734.47	1734.45	1734.54	1734.45	1734.5	1734.56	1734.4	1734.61	1734.41	1734.67	1734.29	1734.56	1734.73	1734.24	1734.63	1734.55	1734.51	1734.48	1734.81	1733.97	1735.75	1732.38	1735.25	1734.06	1734.44	1734.36	1734.3	1734.31	1734.33	1734.27	1734.37	1734.25	1734.38	1734.27
-83	1734.32	1734.63	1734.47	1734.39	1734.64	1734.25	1734.6	1734.26	1734.44	1734.47	1734.36	1734.56	1734.34	1734.63	1734.29	1734.65	1734.38	1734.57	1734.57	1734.38	1734.78	1734.28	1734.75	1734.53	1734.43	1734.92	1734.27	1734.94	1734.86	1733.72	1735.58	1734.26	1734.94	1734.07	1735.3	1733.7	1735.3	1733.99	1734.91	1734.15	1734.68	1734.25	1734.36	1734.39	1734.14	1734.61	1734.04	1734.72	1734.16
-81	1734.33	1734.28	1734.26	1734.42	1734.22	1734.45	1734.39	1734.27	1734.56	1734.27	1734.47	1734.47	1734.38	1734.38	1734.5	1734.27	1734.62	1734.42	1734.62	1734.58	1734.53	1734.56	1734.6	1734.48	1734.69	1734.45	1734.75	1734.48	1734.55	1734.69	1734.48	1734.73	1734.39	1734.88	1734.43	1734.63	1734.93	1734.46	1734.96	1734.12	1734.78	1734.16	1734.59	1734.36	1734.13	1734.63	1734.1	1734.75	1734.11
-79	1734.27	1734.33	1734.37	1734.31	1734.33	1734.64	1733.94	1735.02	1733.76	1734.98	1733.9	1734.93	1733.95	1734.87	1734.64	1734.46	1734.74	1734.42	1734.82	1734.44	1734.74	1734.51	1734.71	1734.5	1734.73	1734.46	1734.79	1734.36	1734.94	1734.31	1735	1734.15	1735.12	1734.13	1734.52	1735.49	1733.32	1736.75	1731.1	1738.41	1730.75	1735.48	1734.12	1733.91	1735.02	1733.64	1734.92	1734.09	1734.81
-77	1734.39	1734.38	1734.39	1734.51	1734.34	1734.69	1734.17	1735.03	1733.7	1735.25	1734.22	1734.31	1735.16	1732.73	1736.8	1732.84	1735.42	1734.29	1734.81	1734.41	1734.89	1734.24	1735.26	1733.76	1735.21	1734.55	1734.47	1734.83	1734.31	1734.85	1734.19	1735.02	1733.6	1735.92	1732.83	1736.26	1733.16	1735.79	1734.07	1734.23	1735.1	1733.59	1735.01	1734.56	1734.35	1734.49	1734.74	1734.36	1734.6
-75	1734.49	1734.45	1734.47	1734.51	1734.52	1734.56	1734.58	1734.53	1734.67	1734.46	1734.79	1734.27	1735.1	1733.83	1735.61	1733.31	1735.85	1733.61	1735.09	1734.41	1734.29	1734.96	1733.85	1735.24	1733.64	1735.92	1732.99	1736.49	1733.54	1734.94	1734.58	1733.97	1735.41	1734.01	1734.62	1734.13	1734.68	1734.47	1734.7	1734.46	1734.65	1733.36	1736.19	1732.2	1734.23	1735.46	1731.61	1736.65	1733.21
-73	1734.14	1734.66	1734.49	1734.56	1734.64	1734.56	1734.68	1734.58	1734.69	1734.62	1734.71	1734.6	1734.73	1734.67	1734.65	1734.83	1734.54	1735.03	1734.21	1735.57	1733.4	1736.76	1733.13	1735.88	1734.01	1735.04	1734.58	1734.7	1734.82	1734.59	1734.79	1734.27	1735.02	1733.84	1735.26	1733.63	1735.52	1733.11	1736.37	1732.14	1737.6	1731.11	1736.76	1731.21	1733.87	1729.12	1735.93	1731.31	1738.64
-71	1734.38	1734.69	1734.62	1734.67	1734.68	1734.72	1734.68	1734.76	1734.68	1734.78	1734.65	1734.86	1734.57	1734.94	1734.56	1734.97	1734.63	1734.94	1734.71	1734.81	1734.9	1734.63	1735.04	1734.57	1734.99	1734.64	1734.88	1734.67	1734.86	1734.64	1734.88	1734.56	1734.9	1734.49	1734.91	1734.47	1734.72	1734.78	1734.24	1735.07	1734.16	1734.88	1734.15	1734.97	1734.54	1731.03	1741.17	1729.01	1740.05
-69	1734.77	1734.67	1734.76	1734.73	1734.78	1734.77	1734.79	1734.79	1734.79	1734.79	1734.84	1734.79	1734.89	1734.75	1734.94	1734.75	1734.99	1734.71	1735.03	1734.69	1735.01	1734.74	1734.93	1734.8	1734.88	1734.81	1734.83	1734.83	1734.75	1734.88	1734.66	1734.96	1734.57	1735.02	1734.52	1735.01	1734.52	1734.95	1734.37	1735.23	1733.38	1736.91	1729.99	1743.59	1725.26	1747.83	1731.06	1736.28	1735.28
-67	1734.84	1734.75	1734.83	1734.82	1734.83	1734.83	1734.83	1734.83	1734.85	1734.86	1734.88	1734.9	1734.88	1734.94	1734.9	1734.97	1734.88	1734.96	1734.84	1734.96	1734.89	1734.94	1734.9	1734.91	1734.89	1734.88	1734.88	1734.88	1734.86	1734.84	1734.87	1734.78	1734.89	1734.74	1734.9	1734.69	1734.86	1734.78	1734.62	1735	1734.21	1735.31	1733.79	1736.44	1732.36	1740.07	1731.54	1736.83	1734.49
-65	1734.87	1734.91	1734.89	1734.9	1734.9	1734.9	1734.89	1734.89	1734.92	1734.94	1734.94	1734.93	1734.96	1734.95	1735	1734.95	1735.02	1734.94	1735	1734.93	1734.99	1734.96	1734.95	1734.95	1734.93	1734.94	1734.92	1734.94	1734.91	1734.92	1734.87	1734.9	1734.82	1734.9	1734.8	1734.87	1734.81	1734.74	1734.96	1734.46	1735.26	1734.13	1735.68	1733.6	1736.16	1733.21	1735.96	1735.09	1734.34
-63	1734.99	1734.99	1734.99	1734.97	1734.99	1735	1735.01	1734.99	1735.02	1735.05	1735.04	1735.03	1735.03	1735.05	1735.02	1735.07	1735.04	1735.05	1735.01	1735.03	1735.01	1735.01	1735.01	1735	1734.99	1734.99	1734.99	1734.98	1734.96	1734.94	1734.95	1734.9	1734.94	1734.87	1734.94	1734.85	1734.91	1734.83	1734.87	1734.83	1734.78	1734.92	1734.76	1734.92	1734.87	1734.89	1735.3	1734.37	1735.7
-61	1735.14	1735.12	1735.14	1735.13	1735.13	1735.13	1735.12	1735.14	1735.14	1735.14	1735.13	1735.11	1735.12	1735.12	1735.13	1735.13	1735.13	1735.1	1735.11	1735.08	1735.09	1735.08	1735.04	1735.06	1735.03	1735.02	1735.02	1735.03	1735.02	1734.99	1734.99	1734.98	1734.96	1734.98	1734.93	1734.98	1734.88	1734.93	1734.9	1734.83	1734.93	1734.82	1735.04	1734.84	1735.12	1734.91	1735.19	1735.08	1735.16
-59	1735.29	1735.28	1735.27	1735.27	1735.27	1735.26	1735.24	1735.24	1735.22	1735.23	1735.23	1735.22	1735.2	1735.22	1735.21	1735.21	1735.17	1735.18	1735.17	1735.15	1735.12	1735.12	1735.09	1735.08	1735.07	1735.05	1735.05	1735.07	1735.06	1735.06	1735.05	1735.03	1735.05	1735.01	1735.01	1734.98	1734.98	1735	1734.94	1735.04	1734.87	1735.17	1734.87	1735.24	1735.01	1735.41	1735.15	1735.43	1735.3
-57	1735.44	1735.44	1735.42	1735.42	1735.39	1735.38	1735.35	1735.36	1735.35	1735.32	1735.33	1735.3	1735.3	1735.32	1735.31	1735.3	1735.25	1735.24	1735.24	1735.21	1735.2	1735.17	1735.17	1735.13	1735.14	1735.13	1735.13	1735.12	1735.13	1735.12	1735.12	1735.1	1735.11	1735.08	1735.06	1735.06	1735.04	1735.05	1735.05	1735.02	1735.15	1735.08	1735.23	1735.36	1735.39	1735.45	1735.53	1735.66	1735.72
-55	1735.66	1735.62	1735.62	1735.59	1735.55	1735.54	1735.49	1735.54	1735.48	1735.46	1735.44	1735.4	1735.41	1735.38	1735.38	1735.34	1735.35	1735.3	1735.3	1735.27	1735.27	1735.24	1735.23	1735.22	1735.2	1735.18	1735.19	1735.17	1735.21	1735.19	1735.18	1735.16	1735.15	1735.13	1735.11	1735.15	1735.07	1735.14	1735.01	1735.23	1735.07	1735.21	1735.65	1735.46	1736.51	1735.71	1736.51	1736.18	1736.27
-53	1735.89	1735.9	1735.86	1735.85	1735.77	1735.77	1735.71	1735.67	1735.64	1735.59	1735.54	1735.49	1735.5	1735.47	1735.45	1735.43	1735.42	1735.37	1735.38	1735.34	1735.32	1735.31	1735.3	1735.28	1735.25	1735.25	1735.26	1735.24	1735.24	1735.22	1735.21	1735.19	1735.17	1735.19	1735.14	1735.19	1735.11	1735.19	1735.08	1735.22	1735.18	1735.37	1735.04	1737.31	1743.5	1739.58	1737.37	1737.18	1736.82
-51	1736.27	1736.19	1736.13	1736.1	1736.03	1735.94	1735.91	1735.8	1735.78	1735.73	1735.69	1735.62	1735.6	1735.56	1735.52	1735.53	1735.48	1735.49	1735.45	1735.42	1735.41	1735.37	1735.38	1735.34	1735.36	1735.33	1735.34	1735.3	1735.32	1735.26	1735.25	1735.27	1735.22	1735.26	1735.21	1735.2	1735.23	1735.05	1735.5	1734.74	1736.01	1733.99	1736.9	1742.88	1742.93	1739.58	1737.79	1737.88	1737.44
-49	1736.81	1736.53	1736.48	1736.32	1736.23	1736.1	1736.04	1735.96	1735.92	1735.87	1735.84	1735.78	1735.74	1735.68	1735.65	1735.59	1735.59	1735.56	1735.56	1735.49	1735.49	1735.47	1735.43	1735.4	1735.41	1735.36	1735.37	1735.35	1735.36	1735.32	1735.33	1735.35	1735.3	1735.34	1735.29	1735.23	1735.4	1734.94	1736.05	1733.99	1737.56	1731.27	1741.16	1734.6	1739.37	1738.19	1738.63	1738.19	1738.46
-47	1737.14	1737.1	1736.8	1736.63	1736.44	1736.32	1736.21	1736.1	1736.04	1735.99	1735.96	1735.92	1735.84	1735.82	1735.76	1735.72	1735.69	1735.65	1735.64	1735.6	1735.56	1735.52	1735.48	1735.44	1735.45	1735.44	1735.44	1735.44	1735.43	1735.45	1735.43	1735.45	1735.39	1735.43	1735.4	1735.3	1735.54	1735.02	1735.99	1734.4	1736.85	1733.41	1738.76	1736.66	1741.58	1739.97	1739.83	1739.53	1740.3
-45	1737.93	1737.44	1737.25	1736.85	1736.73	1736.5	1736.38	1736.27	1736.16	1736.11	1736.05	1736.04	1735.99	1735.95	1735.9	1735.85	1735.82	1735.79	1735.77	1735.69	1735.64	1735.61	1735.59	1735.57	1735.57	1735.57	1735.6	1735.58	1735.56	1735.6	1735.56	1735.59	1735.52	1735.51	1735.5	1735.48	1735.45	1735.62	1735.29	1735.97	1734.92	1737.27	1732.9	1740.14	1740.11	1743.61	1742.33	1742.88	1743.32
-43	1738.72	1738.02	1737.3	1737.24	1736.8	1736.73	1736.55	1736.42	1736.31	1736.26	1736.19	1736.15	1736.1	1736.08	1736.07	1736.01	1736	1735.93	1735.88	1735.82	1735.8	1735.77	1735.77	1735.73	1735.75	1735.75	1735.76	1735.76	1735.77	1735.76	1735.72	1735.74	1735.68	1735.63	1735.72	1735.6	1735.66	1735.76	1735.37	1736.42	1734.3	1738.7	1730.77	1743.19	1740.72	1746.66	1747.83	1747.71	1748.78
-41	1739.15	1738.42	1737.72	1737.24	1737.05	1736.8	1736.72	1736.61	1736.51	1736.45	1736.38	1736.3	1736.27	1736.25	1736.22	1736.18	1736.12	1736.06	1736.02	1735.99	1735.94	1735.97	1735.94	1735.93	1735.92	1735.92	1735.93	1735.95	1735.93	1735.91	1735.89	1735.86	1735.85	1735.78	1735.89	1735.81	1735.73	1736.07	1735.3	1736.72	1734.39	1738.84	1735.79	1743.34	1741.29	1747.96	1753.44	1756.77	1757.5
-39	1741.14	1737.88	1738.15	1737.39	1737.13	1737.03	1736.84	1736.77	1736.68	1736.59	1736.53	1736.47	1736.42	1736.42	1736.39	1736.35	1736.24	1736.21	1736.17	1736.16	1736.13	1736.16	1736.15	1736.19	1736.14	1736.17	1736.15	1736.14	1736.14	1736.12	1736.1	1736.04	1736.03	1735.96	1736.13	1735.82	1736.09	1735.99	1735.71	1736.76	1734.2	1740.9	1732.63	1753.66	1763.38	1769.18	1767.54	1778.26	1776.8
-37	1739.3	1738.58	1737.82	1737.47	1737.28	1737.11	1737.01	1736.92	1736.79	1736.75	1736.68	1736.64	1736.6	1736.57	1736.57	1736.51	1736.48	1736.42	1736.38	1736.37	1736.35	1736.44	1736.45	1736.49	1736.45	1736.46	1736.42	1736.41	1736.43	1736.43	1736.38	1736.28	1736.28	1736.16	1736.25	1736.06	1736.06	1736.38	1735.28	1737.47	1733.67	1741.71	1737.3	1754.24	1767.9	1774.89	1787.28	1806.24	1809.93
-35	1738.38	1738.33	1737.56	1737.62	1737.26	1737.28	1737.09	1737.07	1736.97	1736.88	1736.87	1736.79	1736.82	1736.79	1736.82	1736.79	1736.74	1736.67	1736.65	1736.65	1736.73	1736.75	1736.79	1736.85	1736.83	1736.78	1736.73	1736.74	1736.75	1736.8	1736.69	1736.6	1736.5	1736.38	1736.45	1736.29	1736.23	1736.33	1735.98	1736.18	1736.22	1738.53	1744.67	1748.22	1757.92	1760.4	1804.73	1833.12	1858.28
-33	1738.25	1737.95	1737.69	1737.53	1737.42	1737.34	1737.33	1737.23	1737.18	1737.09	1737.08	1737.05	1737.08	1737.06	1737.07	1737.08	1737.03	1737.02	1737.06	1737.12	1737.17	1737.19	1737.25	1737.26	1737.24	1737.12	1737.13	1737.14	1737.11	1737.14	1737.02	1736.88	1736.77	1736.69	1736.59	1736.58	1736.12	1737.01	1735.25	1737.19	1736.77	1737.12	1749.02	1749.92	1756.29	1758.47	1813.52	1896.58	1938.45
-31	1738.18	1737.98	1737.76	1737.63	1737.55	1737.58	1737.59	1737.53	1737.47	1737.42	1737.43	1737.44	1737.44	1737.47	1737.51	1737.47	1737.49	1737.52	1737.59	1737.63	1737.68	1737.75	1737.76	1737.75	1737.63	1737.55	1737.51	1737.55	1737.51	1737.45	1737.28	1737.18	1737.06	1736.96	1736.77	1736.64	1736.61	1736.67	1735.93	1737.6	1736.23	1739.02	1745.43	1732.79	1751.29	1761.95	1837.81	1884.1	1933.18
-29	1738.3	1738.15	1738.02	1737.94	1737.97	1737.95	1737.92	1737.93	1737.9	1737.92	1737.92	1737.91	1737.93	1737.96	1738.05	1738.06	1738.08	1738.15	1738.25	1738.24	1738.33	1738.32	1738.29	1738.19	1738.06	1737.98	1737.92	1737.9	1737.86	1737.72	1737.59	1737.38	1737.26	1737.15	1736.84	1737.09	1736.2	1737.23	1736.54	1735.6	1739.18	1734.63	1755.32	1721.3	1800.52	1731.67	1853.78	1898.87	2038.97
-27	1738.51	1738.37	1738.31	1738.29	1738.4	1738.33	1738.29	1738.34	1738.35	1738.42	1738.46	1738.49	1738.56	1738.55	1738.63	1738.67	1738.72	1738.79	1738.77	1738.81	1738.91	1738.78	1738.7	1738.58	1738.42	1738.34	1738.2	1738.16	1738.07	1737.89	1737.72	1737.52	1737.34	1737.22	1736.84	1737.11	1736.58	1736.83	1738	1729.41	1748.82	1722.56	1774.14	1736.63	1783.05	1724.54	1837.28	1887.11	1936.17
-25	1738.82	1738.66	1738.73	1738.73	1738.81	1738.75	1738.77	1738.9	1738.9	1739.04	1739.07	1739.15	1739.16	1739.25	1739.31	1739.38	1739.42	1739.49	1739.44	1739.38	1739.27	1739.12	1739.07	1738.84	1738.75	1738.58	1738.4	1738.29	1738.16	1737.95	1737.76	1737.54	1737.37	1737.24	1737.02	1737.2	1736.47	1737.8	1733.93	1733.74	1750.17	1716.66	1764.55	1756	1741.13	1752.32	1799.66	1881.43	1860.68
-23	1739.3	1739.28	1739.34	1739.39	1739.42	1739.46	1739.61	1739.72	1739.59	1739.69	1739.83	1739.87	1739.92	1740.03	1740.12	1740.23	1740.25	1740.26	1740.15	1739.87	1739.7	1739.51	1739.36	1739.2	1739.05	1738.82	1738.64	1738.46	1738.32	1738.08	1737.84	1737.63	1737.37	1737.32	1737.17	1737.01	1737.01	1735.86	1734.85	1739.59	1744.19	1719.78	1738.4	1765.89	1684.77	1811.11	1747.27	1884.49	1840.73
-21	1739.92	1739.93	1740.04	1740.06	1740.19	1740.26	1740.5	1740.5	1740.45	1740.51	1740.57	1740.66	1740.72	1740.9	1740.98	1741.07	1740.97	1740.86	1740.67	1740.39	1740.16	1739.89	1739.7	1739.47	1739.25	1739.03	1738.81	1738.66	1738.36	1738.06	1737.82	1737.6	1737.37	1737.39	1736.95	1737.25	1736.35	1735.95	1738.25	1741.98	1736.25	1729.02	1719.99	1761.61	1701.72	1813.87	1750.75	1846.31	1832.44
-19	1740.83	1740.9	1741.11	1741.09	1741.26	1741.36	1741.59	1741.63	1741.69	1741.69	1741.69	1741.75	1741.79	1741.98	1741.97	1742.03	1741.79	1741.55	1741.32	1741	1740.74	1740.47	1740.22	1739.97	1739.7	1739.45	1739.16	1738.86	1738.54	1738.19	1737.93	1737.67	1737.65	1737.26	1737.12	1737.26	1736.07	1737.33	1742.73	1732.67	1744.27	1717.57	1725.37	1760.13	1765.1	1786.19	1745.33	1827.47	1845.82
-17	1742.03	1742.29	1742.44	1742.58	1742.79	1742.96	1743.1	1743.04	1743.06	1743.15	1743.09	1743.11	1743.07	1743.11	1743.14	1742.92	1742.63	1742.36	1742.03	1741.76	1741.52	1741.17	1740.89	1740.53	1740.21	1739.86	1739.52	1739.21	1738.83	1738.47	1738.2	1738.01	1737.73	1737.58	1737.61	1736.83	1737.16	1742.36	1733.9	1735.52	1733.23	1705.71	1756.24	1753.52	1779.35	1779.42	1823.86	1833.12	1847.21
-15	1743.88	1744.26	1744.47	1744.62	1744.92	1744.93	1744.95	1744.98	1744.95	1744.94	1744.74	1744.63	1744.48	1744.36	1744.22	1743.96	1743.67	1743.37	1743.08	1742.78	1742.5	1742.09	1741.69	1741.31	1740.88	1740.46	1740.05	1739.66	1739.26	1738.91	1738.7	1738.31	1738.17	1738.34	1737.08	1737.66	1741.29	1732	1742.92	1728.55	1727.95	1740.69	1762.05	1796.82	1745.27	1824.66	1824.04	1830.49	1812.84
-13	1746.48	1746.88	1747.15	1747.28	1747.38	1747.29	1747.27	1747.27	1747.09	1746.91	1746.67	1746.33	1746.15	1745.87	1745.74	1745.35	1745.01	1744.67	1744.35	1744.06	1743.64	1743.24	1742.8	1742.34	1741.85	1741.37	1740.9	1740.41	1739.98	1739.67	1739.25	1738.98	1739.16	1738.25	1737.13	1743.58	1728.47	1743.48	1743.52	1716.75	1741.17	1755.2	1780.18	1770.58	1769.26	1834.87	1818.61	1845.16	1790.25
-11	1749.84	1750.1	1750.24	1750.28	1750.24	1750.17	1749.97	1749.76	1749.59	1749.28	1749.07	1748.68	1748.38	1748.07	1747.76	1747.36	1747.05	1746.64	1746.28	1745.84	1745.41	1744.93	1744.39	1743.86	1743.33	1742.82	1742.3	1741.78	1741.36	1740.9	1740.41	1740.53	1739.94	1738.14	1744.1	1732.38	1728.81	1770.75	1695.17	1750.75	1741.01	1820.07	1663.81	1795.81	1778.08	1792.62	1800.02	1788.74	1789
-9	1752.97	1753.04	1753.06	1752.83	1752.8	1752.59	1752.31	1752.02	1751.76	1751.44	1751.21	1750.85	1750.54	1750.14	1749.8	1749.41	1749.02	1748.59	1748.14	1747.64	1747.12	1746.6	1746.09	1745.58	1745.06	1744.55	1744.02	1743.5	1743.04	1742.49	1742.29	1741.94	1740.8	1743.09	1738.4	1726.76	1748.1	1732.66	1682.69	1788.99	1769.77	1812.06	1699.74	1817.03	1770.9	1792.04	1785.9	1781.31	1783.03
-7	1755.97	1755.89	1755.72	1755.59	1755.43	1755.31	1755.04	1754.77	1754.51	1754.19	1753.95	1753.61	1753.28	1752.92	1752.55	1752.1	1751.64	1751.18	1750.68	1750.21	1749.68	1749.17	1748.62	1748.1	1747.57	1747.01	1746.46	1745.89	1745.29	1744.73	1744.33	1743.6	1743.3	1740.72	1736.54	1737.6	1748.54	1689.25	1737.17	1769.77	1808.96	1767.07	1815.83	1782.78	1794.18	1789.58	1784.4	1782.68	1779.94
-5	1758.53	1758.46	1758.29	1758.24	1758.13	1758.09	1757.94	1757.83	1757.59	1757.41	1757.2	1756.96	1756.7	1756.32	1756.01	1755.6	1755.18	1754.73	1754.28	1753.81	1753.34	1752.81	1752.32	1751.77	1751.16	1750.52	1749.86	1749.2	1748.43	1747.69	1746.73	1745.89	1743.65	1744.04	1740.06	1745.06	1725.93	1714.85	1804.82	1769.31	1816.64	1820.55	1931.44	1783.62	1816.1	1812.57	1792.03	1800.17	1796.95
-3	1761.12	1760.93	1760.87	1760.79	1760.79	1760.83	1760.83	1760.79	1760.76	1760.7	1760.64	1760.54	1760.37	1760.17	1759.95	1759.69	1759.38	1759.03	1758.67	1758.29	1757.82	1757.36	1756.81	1756.24	1755.56	1754.87	1754.1	1753.36	1752.42	1751.59	1750.37	1749.87	1747.74	1748.79	1742.53	1742.8	1739.59	1726.61	1840.73	1801.37	1840.68	1981.99	1832.51	1777.08	1795.75	1797.84	1797.21	1812.15	1838.26
-1	1763.36	1763.24	1763.17	1763.11	1763.12	1763.18	1763.26	1763.32	1763.4	1763.44	1763.5	1763.51	1763.49	1763.46	1763.37	1763.25	1763.08	1762.87	1762.61	1762.32	1761.93	1761.5	1760.99	1760.44	1759.82	1759.18	1758.41	1757.65	1756.68	1755.79	1754.78	1754.22	1751.9	1753.12	1744.54	1750.11	1763.78	1712.38	1820.33	1806.32	1857.32	1983.67	1813.74	1777.09	1793.05	1795.39	1807.65	1806.79	1806.46
1	1765.66	1765.45	1765.24	1765.19	1765.03	1765.02	1765.05	1765.09	1765.18	1765.26	1765.36	1765.45	1765.54	1765.62	1765.67	1765.65	1765.64	1765.55	1765.42	1765.25	1765	1764.68	1764.32	1763.89	1763.38	1762.84	1762.28	1761.72	1761.11	1760.65	1760.08	1760.24	1759.37	1761.31	1757.48	1767.92	1773.12	1731.29	1755.91	1791.57	1815.53	1855.94	1788.29	1801.21	1786.19	1795.41	1788.29	1788.47	1792.82
3	1769.14	1768.8	1768.4	1768.26	1768.04	1767.79	1767.67	1767.57	1767.48	1767.5	1767.47	1767.52	1767.55	1767.57	1767.66	1767.66	1767.69	1767.63	1767.63	1767.57	1767.51	1767.38	1767.2	1767.03	1766.78	1766.59	1766.45	1766.6	1766.64	1767.07	1767.45	1768.9	1769.37	1771.83	1772.35	1780.94	1773.42	1781.19	1746.67	1793.17	1790.27	1849.6	1797.01	1831	1788.75	1786.69	1797.06	1788.55	1797.38
5	1774.39	1773.98	1773.47	1773.3	1772.98	1772.72	1772.46	1772.27	1772.01	1771.86	1771.63	1771.52	1771.25	1771.14	1770.9	1770.82	1770.59	1770.47	1770.3	1770.16	1770.07	1770.01	1770.07	1770.11	1770.22	1770.47	1770.97	1771.71	1772.62	1773.96	1775.43	1777.39	1778.6	1781.29	1782.24	1787.59	1781.19	1798.52	1789	1807.23	1812.08	1844.88	1845.59	1879.09	1809.75	1823.58	1775.37	1803.48	1791.82
7	1780.84	1780.46	1780.17	1779.79	1779.58	1779.25	1779.1	1778.86	1778.74	1778.49	1778.33	1778.05	1777.76	1777.38	1777.04	1776.75	1776.33	1775.96	1775.49	1775.2	1774.88	1774.78	1774.88	1775.09	1775.55	1776.22	1777.32	1778.49	1779.91	1781.76	1783.42	1785.33	1786.94	1788.37	1789.84	1792.51	1791.58	1797.28	1796.94	1814.51	1811.81	1886	1818.55	1870.97	1855.31	1837.18	1801.39	1801.97	1787.61
9	1787.09	1787	1786.77	1786.57	1786.33	1786.13	1786.08	1786.09	1786.11	1786.26	1786.17	1786.14	1785.89	1785.71	1785.5	1785.29	1784.99	1784.54	1784.06	1783.52	1783.13	1782.76	1782.69	1782.9	1783.61	1784.53	1785.85	1787.04	1788.73	1790.07	1791.45	1792.42	1793.3	1794.2	1793.83	1793.85	1798.1	1796.04	1801.14	1804.87	1804.89	1858.06	1853.12	1861.02	1852.73	1874.6	1945.67	1934.93	1800.18
11	1792.53	1792.62	1792.6	1792.66	1792.66	1792.54	1792.53	1792.51	1792.7	1792.88	1793.27	1793.33	1793.58	1793.62	1793.72	1793.66	1793.65	1793.36	1792.85	1792.19	1791.52	1791.06	1790.69	1790.75	1791.17	1792.24	1793.33	1795.16	1796.46	1798.38	1799.44	1800.77	1800.15	1799.81	1799.11	1798.44	1802.53	1803.24	1805.32	1794.54	1802.8	1805.59	1826.45	1826.93	1828.97	1827.03	1854.68	1858.1	1812.25
13	1797	1797.21	1797.37	1797.46	1797.56	1797.68	1797.65	1797.87	1797.83	1798.21	1798.55	1799.05	1799.3	1799.79	1799.93	1800.17	1800.31	1800.37	1800.06	1799.46	1798.67	1797.88	1797.24	1796.56	1796.63	1796.68	1798.18	1798.82	1801.61	1803.42	1806.54	1810.27	1812.31	1806.45	1803.6	1814.56	1810.33	1818.8	1801.14	1798.49	1796.45	1799.19	1800.6	1802.13	1803.66	1804.56	1805.7	1801.38	1799.03
15	1800.89	1801.03	1801.24	1801.32	1801.48	1801.35	1801.78	1801.85	1802.47	1802.56	1802.82	1803.28	1804.05	1804.32	1805	1805.12	1805.52	1805.73	1805.82	1805.53	1805.06	1804.33	1803.39	1802.65	1801.66	1801.53	1801.25	1802.27	1802.68	1804.92	1794.28	1820.75	1812.35	1838.78	1811.39	1840.32	1803.27	1820.75	1800.83	1800.09	1796.22	1798.15	1798.51	1799.54	1800.05	1800.19	1799.98	1800.38	1800.95
17	1804.61	1804.5	1804.63	1804.52	1804.66	1804.76	1804.8	1804.58	1805.37	1805.69	1806.98	1806.98	1807.83	1808.63	1808.9	1809.66	1809.9	1810.44	1810.86	1811.14	1811.01	1810.43	1810.17	1808.38	1807.4	1806.16	1805.57	1803.72	1811.06	1798.78	1799.77	1828.66	1820.17	1844.07	1842.65	1870.4	1814.82	1803.79	1799.96	1800.23	1800.2	1800.06	1801.34	1800.99	1801.32	1801.07	1801.6	1802.49	1802.82
19	1808.2	1808.06	1808.18	1807.7	1808.24	1807.61	1808.48	1808.51	1806.36	1809.9	1807.55	1811.83	1810.19	1812.41	1812.58	1813.4	1814.11	1814.56	1815.22	1815.82	1816.27	1816.41	1815.67	1816.86	1813.08	1811.86	1811.71	1805.69	1817.74	1795.11	1850.03	1822.83	1891.59	1832.94	1900.57	1872.48	1822.48	1804.59	1804.47	1802.98	1805.28	1805.5	1807.81	1831.73	1802.45	1807.27	1801.74	1804.72	1804.46
21	1811.63	1811.48	1811.34	1811.32	1811.04	1811.29	1810.96	1811.88	1812.41	1811.91	1812.37	1813.25	1813.64	1814.9	1815.35	1816.64	1817.37	1818.24	1818.9	1819.51	1820.15	1820.99	1821.46	1821.04	1823.85	1814.96	1824.63	1807.81	1818.09	1812.75	1842.51	1830.66	1865.13	1840.97	1848.76	1834.1	1821.54	1810.53	1811.51	1810.38	1811.88	1812.56	1805.27	1806.32	1804.67	1805.54	1805.09	1806.49	1806.32
23	1815.04	1814.93	1814.75	1814.51	1814.61	1814.33	1814.55	1814.18	1814.67	1814.14	1815.06	1815.29	1816.4	1816.96	1818.1	1818.9	1820.03	1821.01	1821.91	1822.47	1823.31	1824.09	1825.49	1826.8	1826.88	1829.03	1824.63	1815.71	1818.13	1811.44	1824.27	1818.37	1845.61	1836.2	1831.3	1825.08	1819.46	1818.25	1824.06	1829.58	1813.42	1808.71	1808.22	1807.1	1807.92	1807.67	1808.57	1808.32	1809.08
25	1818.02	1818	1817.84	1817.75	1817.42	1817.54	1817.31	1817.41	1817.1	1817.08	1817.03	1817.6	1817.99	1819.05	1819.9	1821.02	1822.01	1823.08	1824.09	1825.19	1825.57	1826.73	1827.68	1831.37	1829.94	1839.59	1820.85	1829.06	1805.97	1829.34	1809.57	1837.05	1833.31	1843.46	1835.41	1836.77	1830.71	1825.97	1834.38	1842.68	1817.33	1813.45	1812.6	1811.91	1811.54	1811.51	1811.4	1811.67	1811.76
27	1821.05	1821	1820.84	1820.67	1820.45	1820.17	1820.24	1819.96	1820.14	1819.7	1819.65	1819.5	1819.98	1820.36	1821.17	1822.25	1823.26	1824.31	1825.5	1826.63	1828.1	1827.96	1830.52	1831.82	1838.77	1837.45	1829.18	1825.89	1796.81	1824.28	1810.07	1844.17	1837.94	1858.24	1848.57	1853.16	1845.42	1839	1853.15	1906.66	1827.52	1818.85	1818.4	1817.03	1816.48	1815.64	1815.52	1815.17	1815.22
29	1824.59	1824.41	1824.09	1823.84	1823.58	1823.28	1822.99	1822.8	1822.58	1822.38	1822.15	1821.98	1821.94	1822.14	1822.54	1823.3	1824.28	1825.45	1826.66	1828	1829.05	1830.95	1830.91	1835.7	1843.7	1838.07	1839.83	1807.91	1819.08	1807.6	1824.69	1832.59	1853.25	1869.91	1867.34	1870.59	1862.9	1851.02	1859.26	1873.18	1837.14	1826.93	1825.24	1823.57	1822.3	1821.62	1821.01	1820.51	1819.84
31	1828.12	1827.71	1827.38	1827	1826.64	1826.26	1825.92	1825.44	1825.1	1824.8	1824.66	1824.47	1824.24	1824.22	1824.3	1824.83	1825.6	1826.55	1828	1829.31	1829.9	1833.18	1830.82	1843.23	1855.67	1854.89	1829.44	1826.7	1812.5	1819.28	1826.19	1827.43	1857.66	1864.83	1868.13	1877.59	1867.53	1869.25	1875.39	1871.44	1844.58	1835.82	1833.22	1831.15	1829.67	1828.34	1827.28	1826.41	1825.39
33	1831.53	1830.99	1830.53	1830.2	1829.8	1829.19	1828.65	1828.06	1827.47	1827.07	1826.67	1826.47	1826.12	1825.98	1826	1826.53	1827.2	1827.96	1828.84	1830.93	1830.61	1834.33	1832.38	1848.52	1892.56	1864.07	1835.42	1834.95	1819.59	1815.53	1827.36	1833.44	1854.78	1875.59	1870.38	1887.8	1873.68	1873.93	1888.97	1895.45	1865.09	1848.16	1842.69	1838.88	1836.97	1834.99	1833.53	1832.11	1830.88
35	1834.49	1834.14	1833.58	1833.02	1832.61	1831.93	1831.27	1830.52	1829.81	1829.24	1828.76	1828.2	1827.89	1827.58	1827.68	1828.3	1828.77	1829.57	1830.42	1831.07	1834.08	1831.1	1840.75	1853.99	1865.22	1837.64	1825.49	1818.88	1812.16	1820.72	1829.79	1842.58	1856.6	1868.69	1873.25	1892.36	1884.71	1879.68	1884.66	1891.13	1899.32	1874.65	1856.39	1848.7	1844.69	1841.77	1839.51	1837.67	1835.96
37	1837.34	1836.88	1836.56	1835.98	1835.18	1834.42	1833.66	1832.91	1832.09	1831.46	1830.88	1830.26	1829.72	1829.41	1829.44	1829.91	1830.26	1831.09	1832.01	1831.5	1836.17	1830.42	1850.57	1867.27	1851.69	1822.33	1824.4	1821.06	1799.68	1831.08	1820.62	1851.01	1855.71	1869.47	1880.03	1884.01	1890.4	1891.61	1879.52	1882.96	1883.08	1895.33	1873.06	1861.38	1854.35	1849.58	1845.88	1843.03	1840.67
39	1840.17	1839.57	1839.07	1838.68	1837.99	1837.18	1836.4	1835.63	1834.6	1833.8	1833.15	1832.47	1831.81	1831.49	1831.36	1831.51	1832.01	1832.6	1833.58	1833.23	1836.03	1833.83	1846.52	1848.49	1838.71	1825.5	1813.26	1836.41	1789.43	1842.63	1822.28	1861.35	1851.31	1875.58	1882.06	1892.76	1891.56	1901.58	1902.91	1884.02	1889.41	1925.9	1904.33	1881.4	1868.12	1858.96	1853.15	1848.92	1845.52
41	1842.88	1842.36	1841.72	1841.02	1840.57	1839.92	1839.07	1838.24	1837.29	1836.29	1835.32	1834.62	1833.87	1833.56	1833.37	1833.28	1833.88	1834.11	1834.97	1835.3	1835.39	1838.43	1834.85	1840.18	1821.24	1839.87	1807.88	1852.15	1802.28	1831.53	1829.33	1864.36	1863.46	1878.1	1884.9	1891.73	1915.89	1906.46	1911.36	1910.33	1899.73	1915.59	1962.51	1910.22	1879.61	1867.63	1860.24	1854.8	1850.97
43	1845.47	1844.92	1844.31	1843.55	1842.89	1842.22	1841.57	1840.76	1839.96	1838.8	1837.72	1836.75	1836.03	1835.57	1835.41	1835.13	1835.58	1835.8	1835.87	1837.1	1835.93	1840.84	1835.2	1839.4	1830.46	1835.61	1832.39	1830.39	1830.18	1828.46	1840.79	1894.04	1872.51	1880.03	1888.74	1898.74	1917.73	1912.01	1918.25	1911.9	1920.52	1906.18	1901.97	1906.76	1881.67	1868.45	1863.16	1859.41	1855.22
45	1847.62	1847.14	1846.56	1845.84	1845.08	1844.49	1843.7	1843.1	1842.25	1841.18	1839.94	1838.92	1838.16	1837.72	1837.48	1837.08	1837.29	1837.38	1837.37	1838.32	1837.55	1841.4	1846.66	1843.68	1836.6	1831.33	1833.98	1828.3	1834.4	1836.93	1849.82	1862.92	1871.84	1879.45	1899	1904.33	1908.88	1899.08	1896.68	1891.12	1890.6	1892.35	1899.33	1883.68	1870.55	1866.74	1862.26	1859.3	1856.53
47	1849.54	1848.95	1848.37	1847.76	1847.21	1846.47	1845.81	1844.98	1844.46	1843.38	1842.46	1841.25	1840.57	1839.94	1839.51	1838.98	1838.96	1839.01	1838.84	1839.84	1838.82	1843.62	1843.83	1864.26	1841.33	1844.53	1833.77	1837.85	1842.75	1845.05	1854.88	1860.8	1877.55	1887.38	1894.65	1894.29	1904.21	1899.27	1878.54	1875.72	1871.88	1871.87	1871.69	1874.87	1863.92	1861.36	1859.67	1858.73	1855.64
49	1851.01	1850.48	1849.94	1849.47	1848.86	1848.42	1847.46	1847.05	1846.05	1845.63	1844.53	1843.75	1842.9	1842.19	1841.57	1840.81	1840.99	1840.15	1840.41	1841.3	1839.62	1846.95	1849.04	1853.45	1838.7	1841.99	1847.78	1845.76	1851.16	1851.38	1859.22	1865.29	1876.15	1893.13	1882.95	1876.99	1877.49	1880.07	1873.77	1873.94	1876.34	1867.37	1863.87	1862.7	1858.25	1857.71	1854.88	1856.89	1855.93
51	1852.16	1851.67	1851.23	1850.67	1850.52	1849.66	1849.6	1848.23	1848.23	1846.89	1846.64	1845.44	1844.99	1844.24	1843.33	1843.23	1841.82	1842.64	1841.05	1842.36	1841.12	1837.43	1846.2	1843.4	1837.38	1849.95	1851.32	1860.72	1854.48	1859.08	1864.95	1872.62	1883.32	1885.06	1880.57	1876.83	1875.95	1883.65	1890.06	1887.14	1882.85	1868.76	1862.12	1858.45	1856.07	1855.89	1855.25	1857.4	1854.21
53	1853.44	1853.04	1852.42	1852.23	1851.36	1851.49	1850.17	1850.42	1848.85	1849.26	1847.75	1847.6	1846.35	1845.84	1845.24	1844.43	1844.19	1843.81	1842.25	1845.29	1833.87	1849.44	1838.24	1841.47	1844.69	1842.9	1863.51	1863.21	1861.31	1865.08	1874	1880.9	1887.17	1896.11	1884.53	1881.73	1886.66	1891.4	1889.14	1878.88	1867.21	1863.11	1858.63	1858.35	1856.73	1863.42	1862.31	1854.09	1857.86
55	1854.65	1854.08	1853.73	1853.05	1853.11	1852.36	1852.15	1851.13	1851.58	1851.09	1850.42	1848.93	1848.29	1847.07	1846.92	1845.67	1846.29	1843.94	1846.57	1838.72	1847.98	1840.27	1842.96	1844.14	1843.38	1850.25	1855.86	1862.68	1870.68	1867.43	1869.89	1879.5	1882.14	1884.33	1884.3	1885.38	1888.94	1884.94	1878.29	1870.62	1864.93	1861.69	1859.39	1859.34	1857.79	1858.95	1863.06	1857.32	1855.24
57	1855.53	1855.53	1854.55	1854.98	1853.77	1854.66	1853.29	1854.84	1858.72	1856.46	1852.55	1850.93	1848.64	1848.87	1847.07	1847.51	1846.01	1847.13	1842.54	1850.33	1842.52	1845.7	1850.52	1850.66	1857.73	1851.86	1864.55	1867.98	1876.47	1875.9	1871.69	1868.91	1869.9	1877.57	1883.66	1885.42	1882.58	1873.31	1868.69	1867.07	1864.88	1863.3	1864.4	1861.92	1860.62	1855.5	1863.02	1855.31	1857.23
59	1857.1	1856.72	1856.71	1855.92	1856.83	1855.93	1857.37	1857.7	1856.81	1861.17	1854.46	1851.82	1850.04	1850.06	1848.53	1848.27	1846.54	1853.44	1842.47	1845.67	1844.02	1847.72	1853.92	1908.76	1896.08	1870.52	1873.52	1875.35	1881.66	1880.04	1878.66	1869.11	1869.35	1878.66	1881.39	1874.25	1870.95	1868.48	1866.42	1865.26	1864.4	1865.51	1864.99	1862.24	1863.06	1855.28	1865.13	1853.58	1858.1
61	1859.14	1858.66	1858.14	1859.04	1858.03	1860.6	1865.58	1858.46	1866.21	1847.25	1881.88	1840.84	1870.37	1846.25	1855.39	1847.38	1844.4	1844.37	1842.61	1845.57	1843.73	1850.7	1852.19	1876.16	1871.86	1870.58	1873.05	1868.85	1866.33	1867.55	1869.21	1868.6	1869.65	1872.07	1871.01	1869.37	1866.7	1866.56	1864.44	1865.03	1862.76	1865.22	1862	1862.25	1858.29	1859.79	1856.85	1857.72	1854.72
63	1861.89	1860.73	1861.32	1860.26	1860.86	1859.85	1861.72	1858.73	1861.6	1855.46	1855.14	1852.15	1859.67	1847.6	1858.84	1846.1	1851.34	1842.14	1847.57	1842.03	1851.76	1850.16	1852.91	1867.01	1867.88	1864.51	1865.88	1866.65	1865.25	1867.89	1867.65	1870.27	1870.06	1870.56	1869.61	1867.5	1865.79	1865.33	1864.2	1863.98	1862.44	1863.14	1860.88	1862.71	1858.59	1862.09	1855.98	1858.43	1855.4
65	1864.13	1865.56	1865.33	1864.22	1862.67	1861.65	1861.69	1859.66	1861.58	1859.91	1856.18	1855.2	1854.56	1852.54	1853.72	1848.62	1853.64	1849.2	1848.9	1848.73	1848.84	1850.07	1856.76	1861.9	1862.54	1860.52	1865.36	1866.02	1868.11	1867.31	1868.47	1868.34	1870.05	1868.79	1868.8	1865.87	1868.19	1863.32	1866.49	1862.61	1863.1	1863.67	1865.76	1866.46	1867.7	1857.98	1861.17	1856.14	1857.33
67	1865.2	1867.12	1865.41	1866.28	1864.28	1865.77	1866.97	1867.92	1864.18	1863.35	1859.34	1858.73	1863.71	1867.85	1865.54	1860.46	1854.89	1863.56	1857.25	1860.23	1853.22	1858.3	1861.49	1865.66	1863.48	1863.24	1864.99	1866.21	1865.86	1867.44	1867.28	1867.36	1868.53	1866.12	1869.18	1863.47	1868.51	1862.56	1868.44	1861.62	1864.42	1862.49	1865.35	1867.51	1859.91	1866.4	1856.39	1858.95	1857.63
69	1866.1	1865.79	1865.57	1866.32	1866.26	1868.51	1867.8	1869.96	1869.4	1869.33	1869.97	1870.49	1867.44	1865.5	1863.3	1866.04	1865.97	1871.67	1871.72	1870.54	1864.16	1866.27	1860.04	1870.29	1860.44	1867.41	1864.48	1866.47	1866.12	1866.93	1866.64	1866.32	1865.64	1866.81	1865.4	1866.53	1864.6	1864.51	1865.65	1862.86	1863.36	1862.17	1862.05	1860.86	1864.8	1858.45	1861.2	1856.99	1859.3
71	1866.88	1865.74	1866.94	1866.22	1867.5	1867.54	1869.97	1871.94	1878.39	1879.77	1878.54	1877.94	1877.22	1871.46	1869.4	1868.04	1868.39	1867.25	1867.82	1866.09	1866.56	1864.8	1865.39	1865.76	1864.85	1868.27	1865.17	1867.85	1865.95	1867.37	1866.01	1865.26	1866.56	1862.89	1868.85	1861.3	1867.04	1864.11	1865.16	1864.23	1863.68	1860.28	1863.4	1857.74	1860.97	1858.26	1859.68	1855.52	1858.29
73	1867.02	1866.99	1866.83	1866.88	1866.81	1867.25	1867.37	1868.26	1868.47	1869.03	1868.98	1869.29	1868.93	1868.63	1867.92	1867.7	1867.33	1866.8	1866.93	1866.18	1866.69	1865.57	1866.47	1866.3	1866.79	1866.48	1865.35	1867.1	1864.73	1866.95	1865.23	1865.08	1867.66	1862.29	1868.14	1860.72	1868.07	1858.49	1869.36	1856.75	1868.53	1861.28	1859.91	1861.3	1858	1858.69	1855.75	1854.37	1853.78
75	1867.56	1867.55	1867.47	1867.59	1867.57	1867.42	1867.56	1867.55	1867.79	1867.68	1867.69	1867.69	1867.7	1867.58	1867.54	1867.27	1867.26	1867.03	1866.93	1866.75	1866.26	1866.75	1865.81	1866.98	1865.62	1865.85	1866.35	1865.18	1866.51	1865.38	1865.91	1865.24	1865.24	1864.6	1864.49	1863.4	1864.48	1861.13	1861.72	1862.68	1858.37	1860.78	1858.88	1857.63	1855.61	1853.55	1851.51	1850.41	1848.8
77	1867.66	1867.54	1867.51	1867.54	1867.62	1867.78	1867.8	1867.97	1868.06	1868.09	1867.98	1867.96	1867.84	1867.86	1867.67	1867.64	1867.33	1867.4	1867.26	1867.2	1866.88	1866.73	1866.78	1866.18	1866.63	1865.98	1866.54	1865.83	1866.35	1865.28	1865.83	1864.74	1864.55	1864.92	1861.72	1865.35	1856.22	1868.68	1855.08	1866.43	1853.44	1861.4	1856.52	1853.67	1855.23	1848.9	1851.98	1848.73	1850.26
79	1868.07	1867.98	1867.93	1868.05	1868.19	1868.26	1868.35	1868.28	1868.33	1868.28	1868.17	1868.06	1867.98	1867.87	1867.81	1867.67	1867.7	1867.54	1867.57	1867.35	1867.29	1866.97	1866.94	1866.69	1866.61	1866.45	1866.3	1866.1	1866.01	1865.85	1864.9	1865.59	1862.59	1865.55	1857.17	1867.1	1856.47	1862.44	1858.87	1857.35	1858.35	1864.02	1856.57	1860	1854.11	1851.98	1853.53	1848.1	1851.9
81	1869.22	1869.03	1868.97	1869.01	1869.03	1869	1868.96	1868.93	1868.86	1868.8	1868.68	1868.51	1868.36	1868.29	1868.24	1868.14	1868.01	1867.9	1867.77	1867.66	1867.41	1867.32	1867.07	1867.02	1866.81	1866.78	1866.47	1866.57	1866.19	1866.21	1865.83	1864.93	1865.23	1862.35	1863.04	1861.11	1860.86	1861.14	1857.97	1859.19	1858.19	1856.97	1861.27	1856.69	1860.65	1857.96	1858.87	1854.26	1854.02
83	1870.26	1870.09	1869.91	1869.78	1869.73	1869.7	1869.61	1869.49	1869.37	1869.27	1869.17	1869.03	1868.85	1868.73	1868.66	1868.62	1868.58	1868.51	1868.46	1868.28	1868.17	1868	1867.88	1867.7	1867.59	1867.39	1867.36	1867.06	1867.16	1866.61	1866.83	1866.04	1866.23	1865.18	1864.98	1864.38	1863.55	1863.55	1860.98	1862.12	1860.54	1861.42	1859.74	1862	1860.26	1861.7	1861.42	1860.71	1860.7
85	1870.59	1870.39	1870.23	1870.09	1869.96	1869.85	1869.75	1869.65	1869.55	1869.47	1869.42	1869.4	1869.39	1869.4	1869.39	1869.36	1869.3	1869.19	1869.04	1868.89	1868.78	1868.67	1868.52	1868.42	1868.28	1868.17	1868.01	1867.94	1867.7	1867.81	1867.47	1867.63	1867.2	1867.3	1866.88	1866.83	1866.4	1866.24	1865.61	1865.51	1864.77	1865.09	1864.39	1864.79	1864.18	1864.57	1864.02	1864.4	1863.95
87	1870.7	1870.68	1870.65	1870.6	1870.56	1870.54	1870.51	1870.46	1870.4	1870.33	1870.29	1870.24	1870.19	1870.11	1870.03	1869.93	1869.84	1869.78	1869.73	1869.65	1869.56	1869.47	1869.39	1869.3	1869.19	1869.1	1869.01	1868.91	1868.87	1868.73	1868.82	1868.6	1868.74	1868.45	1868.63	1868.25	1868.49	1868	1868.41	1867.72	1868.37	1867.44	1868.21	1867.36	1867.95	1867.33	1867.7	1867.34	1867.57
89	1870.65	1870.65	1870.65	1870.65	1870.65	1870.65	1870.65	1870.65	1870.65	1870.65	1870.65	1870.65	1870.65	1870.65	1870.65	1870.65	1870.65	1870.65	1870.65	1870.65	1870.65	1870.65	1870.65	1870.65	1870.65	1870.65	1870.65	1870.65	1870.65	1870.65	1870.65	1870.65	1870.65	1870.65	1870.65	1870.65	1870.65	1870.65	1870.65	1870.65	1870.65	1870.65	1870.65	1870.65	1870.65	1870.65	1870.65	1870.65	1870.65
[truncated: 95 more columns]

## Sheet: Fig3_mean
Corresponding measurement station	JAN	FEB	MAR	APR	MAY	JUN	JUL	AUG	SEP	OCT	NOV	DEC
South Pole, Antarctica	1732.32	1728.25	1725.23	1725.11	1728.03	1732.94	1737.49	1741	1742.03	1741.21	1738.96	1736.19
Halley Station, Antarctica	1731.71	1727.64	1725.12	1725.81	1728.77	1734.05	1738.87	1741.79	1742.57	1741.21	1738.56	1735.41
Syowa Station, Antarctica	1731.85	1728.29	1725.3	1725.18	1728.16	1733.24	1738.78	1741.75	1742.36	1741.13	1738.82	1735.89
Palmer Station, Antarctica	1733.77	1729.52	1726.94	1727.22	1730.57	1735.27	1740.41	1743.67	1744.22	1742.95	1739.46	1736.83
Ushuaia	1732.42	1728.78	1726.91	1728.62	1733.34	1737.57	1742.94	1744.45	1744.19	1742.44	1739.55	1736.14
Crozet Island	1732.23	1728.51	1726.78	1728.32	1732.22	1736.66	1740.77	1743.34	1743.72	1742.11	1739.26	1736.23
Baring Head Station	1738.83	1735.67	1735.7	1738.02	1740.14	1743.75	1747.98	1750.25	1751.28	1749.87	1748.12	1743.72
Cape Grim, Tasmania	1733.85	1730.1	1731.19	1734.08	1740.72	1743.5	1746.21	1749.94	1748.74	1745.41	1741.62	1736.85
Easter Island	1733.99	1730.93	1731.08	1733.17	1735.33	1738.5	1741.79	1744.01	1744.88	1743.54	1741.83	1737.23
Tutuila	1744.73	1745.71	1743.1	1740.64	1740.21	1741.47	1744.13	1746.42	1749.11	1749.34	1746.16	1743.77
Ascension Island	1751.51	1752.9	1748.99	1742.77	1740.01	1744.29	1748.94	1750.02	1749.32	1749.27	1748.38	1748.15
Mahe Island	1792.04	1795.25	1779.28	1760.5	1743.55	1741.86	1743.68	1745.89	1747.81	1749.9	1753.12	1769.33
Bukit Kototabang	1879.02	1898.79	1889.91	1858.05	1842.98	1820.23	1813.03	1839.25	1835.92	1819.32	1836.29	1860.18
Christmas Island	1763.76	1769.16	1779.2	1777.19	1765.57	1759.87	1760.87	1762.3	1765.87	1760.65	1758.68	1760.82
Ragged Point	1805.62	1805.46	1808.58	1806.03	1804.65	1799.72	1796.82	1792.67	1790.19	1787.88	1791.54	1799.55
Mariana Islands	1814.92	1811.93	1815.57	1805.31	1794.43	1779.35	1761.86	1759.14	1765.56	1779.7	1797.95	1803.85
Cape Kumukahi, Hawaii	1807.67	1815.58	1819.31	1821	1820.53	1814.38	1797.48	1790.82	1790.64	1798.16	1808.03	1808.64
Mauna Loa, Hawaii	1811.79	1819.73	1821.93	1824.39	1823.15	1815.53	1798.51	1791.71	1791.23	1800.14	1810.64	1811.88
Assekrem	1832.15	1828.81	1829.27	1828.12	1820.25	1815.14	1811.16	1814.46	1814.84	1813.7	1825.92	1828.12
Key Biscayne, Florida	1850.36	1856.53	1847.25	1846.89	1860.35	1861.69	1806.46	1804.11	1848.59	1857.91	1835.32	1839.74
Sand Island, Midway	1839.75	1840.11	1839.16	1838.65	1833.46	1819.88	1801.68	1794.4	1806.75	1820.93	1825.9	1834.06
Izana, Tenerife, Canary Islands	1830.54	1832.59	1836.23	1836.76	1834.14	1829.45	1824.31	1820.51	1817.19	1822.02	1826.47	1829.14
WIS Station, Negev Desert	1843.92	1845.97	1842.33	1836.75	1824.75	1822.58	1824.93	1828.81	1820.41	1822	1839.94	1843.83
Moody, Texas	1887.88	1885.34	1877.16	1875.92	1857.64	1848.65	1832.03	1828.51	1856.91	1869.91	1878.28	1877.57
Tudor Hill, Bermuda	1842.19	1846.58	1846.71	1844.59	1837.44	1825	1813.87	1817.7	1819.14	1832.49	1836.75	1840.2
St. Davids Head, Bermuda	1842.19	1846.58	1846.71	1844.59	1837.44	1825	1813.87	1817.7	1819.14	1832.49	1836.75	1840.2
Mt. Waliguan	1837.54	1839.73	1843.42	1850.94	1864.07	1871.88	1866.8	1862.36	1877.88	1851.6	1831.22	1831.43
Southern Great Plains, Oklahoma	1882.13	1880.23	1872.89	1870.71	1868.26	1860.41	1846.69	1846.36	1869.78	1876.87	1882.02	1876.4
Tae-ahn Peninsula	1930.07	1926.07	1929.74	1934.08	1944.13	1958.54	1966.69	1956.14	1940.96	1937.4	1934.61	1937.56
Terceira Island, Azores	1834.69	1838.06	1840.39	1836.83	1833.52	1828.06	1821.48	1825.92	1827.01	1832.83	1833.75	1832.53
Point Arena, California	1855.24	1852.58	1852.86	1849.6	1847.99	1845.33	1832.65	1829.06	1839.55	1846.06	1854.42	1854.91
Wendover, Utah	1819.75	1824.93	1823.41	1824.64	1822.03	1811.09	1793.91	1795.16	1796.93	1808.73	1818.69	1820.75
Niwot Ridge, Colorado	1834.86	1839.2	1840.33	1847.05	1840.61	1835.29	1816.37	1814.18	1822.4	1825.32	1829.27	1833.21
Trinidad Head, California	1838.01	1837.11	1840.26	1839.14	1838.89	1838.02	1825.5	1822.85	1830.77	1832.59	1838.86	1837.31
Plateau Assy	1857.59	1857.3	1853.84	1855.21	1857.06	1861.1	1865.04	1865.33	1858.48	1849.94	1845.85	1850.22
Sary Taukum	1865.5	1868.16	1862.33	1867.45	1867.4	1872.49	1873.17	1877.74	1878.7	1875.76	1862.23	1863.19
Black Sea, Constanta	1925.47	1914.12	1908.95	1920.06	1914.86	1918.05	1924.86	1931.96	1934.15	1941.56	1947.56	1933.95
Ulaan Uul	1855.16	1859.08	1861.25	1861.48	1862.69	1863.65	1873.71	1877.94	1876.45	1864.87	1857.22	1852.39
Hegyhatsal	1905.61	1899.32	1895.32	1891.9	1880.52	1877.69	1881.79	1885.82	1887.06	1900.99	1902.61	1905
Shemya Island, Alaska	1857.26	1856.19	1856.42	1853.53	1850.59	1847.03	1838.99	1842.41	1863.97	1871.03	1861.51	1856.43
Mace Head, County Galway	1871.94	1880.25	1873.3	1869.87	1867.68	1863.66	1863.12	1863.31	1879.35	1877.62	1873.33	1878.39
Cold Bay, Alaska	1854.97	1851.02	1853.55	1852.14	1849.07	1843.46	1835.56	1846.58	1864.1	1864.97	1857.5	1853.14
Baltic Sea	1908.37	1916.42	1902.28	1896.47	1882.15	1884.37	1882.53	1883.7	1898.23	1914.55	1908.63	1912.15
Storhofdi, Vestmannaeyjar	1858.95	1864.11	1861.66	1854.7	1849.93	1845.71	1842.73	1849.67	1854.91	1865.78	1864.17	1863.5
Ocean Station M	1864.9	1873.81	1868.97	1861.98	1854.17	1851.89	1850.75	1854.43	1869.24	1875.91	1875.18	1869.14
Pallas-Sammaltunturi GAW Station	1888.36	1888.75	1876.65	1877.94	1897.18	1917.27	1928.73	1952.18	1960.97	1984.72	1896.19	1886.65
Barrow, Alaska	1876.59	1868.92	1868.55	1861.19	1860.99	1890.42	1901.56	1914.36	1900.61	1874.79	1868.43	1870.47
Summit	1848.04	1846.13	1846.03	1846.54	1842.34	1841.91	1841.92	1845.16	1844.85	1848.69	1848.7	1844.92
Ny-Alesund, Svalbard	1878.65	1883.8	1871.4	1867.91	1854.61	1849.81	1845.42	1854.95	1865.46	1881.42	1885.27	1880.35
Alert, Nunavut	1873.27	1870.6	1866.86	1861.57	1852.57	1847.47	1848.06	1851.12	1857.32	1868.11	1869.22	1869.47

## Sheet: Fig3_sd
Corresponding measurement station	JAN	FEB	MAR	APR	MAY	JUN	JUL	AUG	SEP	OCT	NOV	DEC
South Pole, Antarctica	0.968686	1.29052	1.476	2.01962	2.26175	1.83087	1.94082	1.60598	1.06545	1.34233	1.17088	1.01338
Halley Station, Antarctica	1.01925	1.23524	1.34267	1.79619	2.31744	1.87282	1.67093	1.5676	1.47615	1.26104	1.20929	1.0845
Syowa Station, Antarctica	0.908281	1.24412	1.41361	2.08108	2.20213	1.79471	1.87695	2.31106	1.33392	1.53982	1.22667	1.04443
Palmer Station, Antarctica	1.00766	1.12696	1.21594	1.71195	2.0225	2.48941	1.86866	1.36114	1.42031	2.00953	1.64322	1.18328
Ushuaia	1.21604	1.23409	1.31261	2.57629	3.14142	2.7963	2.91844	2.56829	1.92047	1.66176	1.32974	1.20354
Crozet Island	0.926143	1.20715	1.46517	1.754	1.7828	1.765	1.57645	1.69826	1.32035	1.41391	1.19912	1.15803
Baring Head Station	1.52497	1.93568	1.4904	1.84027	2.04554	2.15072	3.06739	1.96499	2.18721	2.50851	2.76317	1.99584
Cape Grim, Tasmania	2.43732	3.32587	2.90074	3.63266	2.77	3.62073	2.43694	2.61502	4.48246	2.49974	1.66892	0.984439
Easter Island	2.34655	1.23735	1.84906	2.12307	1.43985	1.41653	1.4925	1.47513	1.60832	1.49398	1.88119	1.56791
Tutuila	2.93135	3.63148	5.53173	3.70024	2.35029	1.26736	1.37998	1.87168	2.08191	1.95472	2.23812	2.8659
Ascension Island	3.77722	2.06972	1.46438	1.98436	2.00318	1.78211	2.61673	1.6368	1.72464	1.9883	2.01884	2.49159
Mahe Island	11.1067	3.73823	5.07269	3.91412	4.14727	2.08397	1.70157	1.69602	1.86697	1.35537	3.80456	12.0908
Bukit Kototabang	16.1799	11.2376	8.98403	7.10845	6.58358	5.89817	8.62318	11.1722	15.8785	12.5348	9.48314	17.5549
Christmas Island	3.18658	4.21611	2.07728	2.08662	1.77337	1.64696	0.88354	2.10372	2.80109	2.21699	2.29972	1.85369
Ragged Point	4.12638	3.37485	2.82842	4.1726	3.14676	2.26729	2.17529	2.67176	2.68194	2.47102	3.69402	4.12038
Mariana Islands	6.18198	4.9955	3.45995	5.18086	6.96994	4.50905	4.43152	2.27432	4.25316	4.35093	4.23558	5.29694
Cape Kumukahi, Hawaii	3.90507	6.53139	4.45229	6.24962	6.10032	2.81021	6.45809	5.02623	2.233	5.27688	6.2133	4.81009
Mauna Loa, Hawaii	2.9561	6.41871	3.79778	5.47978	6.24426	2.95482	5.65382	4.70515	2.26152	3.36336	5.97865	5.1808
Assekrem	7.18145	6.90244	6.1541	6.61339	5.3197	3.43347	6.03357	4.47724	3.40471	4.43358	12.227	5.03439
Key Biscayne, Florida	11.1449	9.63375	6.30733	8.66319	9.66225	14.0001	4.34489	2.99257	15.2286	10.8228	8.49374	12.729
Sand Island, Midway	3.91439	3.66152	2.40612	3.82742	5.91367	5.68362	5.83635	7.82904	9.01751	8.04525	4.47218	2.88446
Izana, Tenerife, Canary Islands	5.69493	3.27076	4.8659	3.95013	4.2353	2.74937	4.03232	4.50523	4.37063	7.15472	5.31994	4.68948
WIS Station, Negev Desert	9.11149	8.45385	6.6747	7.18143	5.35647	3.98279	7.84182	5.84084	4.03421	8.70536	10.9683	9.04206
Moody, Texas	11.5612	4.93708	7.2102	5.87808	6.98092	13.4921	6.93701	7.31074	9.69899	8.6296	14.2935	5.50022
Tudor Hill, Bermuda	5.45898	4.0618	2.87893	4.67408	5.9061	3.42266	6.23475	8.88502	9.14928	6.60074	8.759	6.07741
St. Davids Head, Bermuda	5.45898	4.0618	2.87893	4.67408	5.9061	3.42266	6.23475	8.88502	9.14928	6.60074	8.759	6.07741
Mt. Waliguan	7.33822	9.31972	9.82741	9.90149	10.8591	5.83177	10.3405	11.7781	17.3031	12.0059	10.9822	5.98026
Southern Great Plains, Oklahoma	13.4221	7.50238	7.64891	5.25111	4.06043	11.3242	11.5105	14.9845	11.6526	8.90082	11.4316	8.04801
Tae-ahn Peninsula	21.763	13.6019	10.5839	8.39498	10.7039	13.0486	24.1523	18.343	10.1702	11.6499	11.0405	27.9397
Terceira Island, Azores	4.58072	4.6183	3.55172	1.99772	3.75046	5.63546	5.67164	5.6656	8.39236	4.47677	4.42929	1.86516
Point Arena, California	8.41652	5.82188	2.87524	5.09728	2.69008	3.41822	8.12491	6.14877	5.4031	6.22693	5.72333	4.10112
Wendover, Utah	5.93143	7.17766	5.6277	4.01406	5.20651	5.09745	11.2771	9.52487	9.84291	7.31034	4.8894	4.63984
Niwot Ridge, Colorado	5.03557	10.7683	5.96576	6.17096	6.12293	10.2536	9.07774	12.4259	10.7605	7.20988	7.35045	8.1035
Trinidad Head, California	4.89015	6.83063	2.27776	4.39722	2.96081	3.7681	7.15465	6.01571	3.98663	8.37119	4.80266	5.39049
Plateau Assy	8.43848	8.42935	8.1715	6.51579	6.68629	5.80082	5.10091	6.39754	6.43371	2.81393	9.38242	6.38571
Sary Taukum	11.0973	8.61887	9.19342	6.30558	7.27965	8.45544	5.99318	7.78499	10.587	6.54726	9.12347	9.5367
Black Sea, Constanta	23.1358	23.3062	17.5741	14.3243	7.54535	8.99998	4.27378	12.5067	8.4297	20.0647	21.6057	17.6614
Ulaan Uul	8.20592	8.33083	5.88589	7.71637	6.00015	5.09787	9.30834	9.55576	9.41504	7.30287	15.0485	9.91737
Hegyhatsal	21.415	18.5442	13.7979	8.23684	5.81132	4.62457	6.59149	7.00585	15.1234	20.6493	14.9065	19.7893
Shemya Island, Alaska	5.07716	3.06135	3.35582	4.48292	3.5162	4.04649	6.52621	7.92865	4.96505	5.22812	5.64877	4.23307
Mace Head, County Galway	10.6049	15.3036	7.93531	13.2046	10.7273	10.0115	8.15566	6.81058	12.955	6.89165	12.9068	14.9961
Cold Bay, Alaska	7.06196	3.28798	3.49701	5.24968	3.54549	4.02554	7.05969	5.63971	4.50795	6.00925	4.87137	4.0192
Baltic Sea	19.9972	13.6883	10.5059	12.8949	13.1725	12.1048	13.8021	8.28389	29.2446	18.0944	10.7147	14.8189
Storhofdi, Vestmannaeyjar	5.59681	3.42655	6.29063	4.53138	4.32626	2.85298	4.3082	4.78061	5.77295	10.1985	4.8165	3.9668
Ocean Station M	8.29084	4.38909	6.33148	3.19465	3.88545	5.22641	6.23752	6.27226	10.2199	11.679	9.26353	7.38438
Pallas-Sammaltunturi GAW Station	14.4606	17.7949	17.0043	10.4142	14.9689	7.05647	12.9281	12.6332	20.978	43.7464	20.88	13.3304
Barrow, Alaska	15.6	8.83624	6.98808	4.50916	5.09775	8.45668	9.04371	13.2526	11.2529	9.63547	5.55489	12.0919
Summit	6.02999	5.44474	7.09051	9.13417	4.58496	4.07746	3.91164	4.11623	5.88458	7.20836	10.5798	7.38584
Ny-Alesund, Svalbard	12.5584	15.1978	10.6391	10.2443	5.72597	5.63125	4.21288	2.7966	12.8498	16.3024	18.4586	14.0613
Alert, Nunavut	11.01	11.0121	10.8602	5.93959	3.28502	3.16159	3.90431	3.52234	5.07992	8.61221	7.81744	11.9194

## Sheet: Fig4
lat (degN) \ lon (degE)	-178.75	-176.25	-173.75	-171.25	-168.75	-166.25	-163.75	-161.25	-158.75	-156.25	-153.75	-151.25	-148.75	-146.25	-143.75	-141.25	-138.75	-136.25	-133.75	-131.25	-128.75	-126.25	-123.75	-121.25	-118.75	-116.25	-113.75	-111.25	-108.75	-106.25	-103.75	-101.25	-98.75	-96.25	-93.75	-91.25	-88.75	-86.25	-83.75	-81.25	-78.75	-76.25	-73.75	-71.25	-68.75	-66.25	-63.75	-61.25	-58.75
-89	-999	-999	-999	-999	-999	-999	-999	-999	-999	-999	-999	-999	-999	-999	-999	-999	-999	-999	-999	-999	-999	-999	-999	-999	-999	-999	-999	-999	-999	-999	-999	-999	-999	-999	-999	-999	-999	-999	-999	-999	-999	-999	-999	-999	-999	-999	-999	-999	-999
-87	-999	-999	-999	-999	-999	-999	-999	-999	-999	-999	-999	-999	-999	-999	-999	-999	-999	-999	-999	-999	-999	-999	-999	-999	-999	-999	-999	-999	-999	-999	-999	-999	-999	-999	-999	-999	-999	-999	-999	-999	-999	-999	-999	-999	-999	-999	-999	-999	-999
-85	-999	-999	-999	-999	-999	-999	-999	-999	-999	-999	-999	-999	-999	-999	-999	-999	-999	-999	-999	-999	-999	-999	-999	-999	-999	-999	-999	-999	-999	-999	-0.88	-999	-999	-999	-3.95	-3.57	-1.26	-999	-999	-999	-999	-999	-999	-999	-999	-999	-999	-999	-999
-83	-999	-999	-999	-999	-999	-999	-999	-999	-999	-999	-999	-999	-999	-999	-999	-999	-999	-999	-999	-999	-999	-999	-999	-999	-999	-999	-3.32	-4.23	-1.96	-3.55	-3.17	-2.26	-2.5	-3.87	-2.51	-2.32	-1.74	-0.89	-999	-999	-999	-999	-999	-999	-999	-999	-999	-999	-999
-81	-999	-999	-999	-999	-999	-999	-999	-999	-999	-999	-999	-999	-999	-999	-999	-999	-999	-999	-999	-999	0.11	-3.12	-2.27	-1.84	-2.7	-4.23	-2.62	-2.44	-2.43	-3.6	-3.39	-2.44	-2.9	-3.23	-3.76	-1.96	0.43	-3.37	-999	-999	-999	-999	-999	-999	-999	-999	-999	-999	-999
-79	-999	-999	-999	-999	-999	-999	-999	-999	-999	-999	-999	-999	-999	-999	-2.35	-1.94	-1.35	-2.05	-2.41	-2.87	-2.21	-2.47	-3.5	-4.31	-3.86	-3.29	-4.22	-2.77	-3.68	-4.91	-4.71	-2.5	-3.79	-3.29	-4.21	-3.51	-2.22	-2.96	-999	-999	-999	-999	-999	-999	-999	-999	-999	-999	-999
-77	-2.31	0.09	0.47	-999	-999	-2.28	-1.36	-2.45	-999	-999	-999	-999	-999	-999	-999	-0.87	-4.87	-2.64	-2.63	-4.57	-4.29	-4.35	-3.1	-2.03	-2.92	-3.76	-2.63	-4.97	0.17	-5.19	1.87	-9.68	-999	-5.36	-2.88	-3.18	-3.04	0.58	-1.51	-999	-999	-999	-999	-5.05	-999	-999	-999	-999	-999
-75	-999	-3.94	-999	-999	-999	-999	-999	-999	-999	-999	-999	-999	-999	-999	-999	-999	-999	-999	-999	-999	-999	-999	-999	-999	-999	-999	-999	-999	-999	-2.09	-5.13	-999	-3.84	-2.19	-1.93	-1.62	-3.65	-1.64	-1.35	-0.62	3.01	-2.76	-2.01	-2.19	-3.1	-2.61	-3.28	-999	-2.1
-73	-999	-999	-999	-999	-999	-999	-999	-999	-999	-999	-999	-999	-999	-999	-999	-999	-999	-1.51	-999	-999	-999	-999	-999	-999	-999	-1.25	-2.59	-1.16	-999	-999	-999	-999	-999	-999	-999	-999	-999	-999	-999	-999	-999	-3.37	-0.61	-999	3.12	-2.68	-2.38	-1.64	-999
-71	-0.11	-999	-999	-999	-999	-0.77	2.35	-999	-999	-5.12	0.91	1.36	-0.19	-999	-999	-999	-1.54	-0.57	0.27	-999	1.72	-0.43	0.54	0.44	-3.47	-3.73	-5.14	-0.67	-999	-2.65	1.37	-1.42	-1.85	1.98	-3.83	-3.14	-999	-999	-999	-999	0.13	0.27	-999	-1.41	0.16	-3.6	-3.71	-2.25	-999
-69	-2.39	-1.14	-0.28	1.26	-0.34	-0.08	-1.33	-999	-999	7.1	-999	-999	-999	-4.15	-1.47	-999	1.28	0.47	-2.49	-1.49	-1.66	0.42	-1.11	-2	-999	-2.65	-0.88	-3.7	-1.74	-0.96	-3.95	0.22	-5.67	-0.54	-0.35	-2.22	1.36	-3.08	0.39	-0.25	-0.99	4.26	-0.47	-1.23	-1.12	-4.81	-999	-999	-999
-67	-1.09	-1.21	-1.35	-1.64	-1.79	-0.83	-1.81	-2.2	-1.93	-2.35	-3.34	-1.76	-2.79	-3.52	-1.91	-1.92	-2.76	-2.6	-1.15	-3.09	0.79	-1.55	-0.39	-1.41	-1.46	-999	-2.68	-3.43	-0.33	-1.39	-2.88	-1.86	0.2	-1.15	-2.38	-6.32	-3.88	-3.13	-1.02	-2.47	1.17	-6.21	0.7	-1.43	-999	-3.39	0.95	-999	-1.83
-65	1.76	-1.01	-1.38	-1.06	-2.42	-2.3	-1.51	-0.43	-0.77	-1.38	-3.37	-2.9	0.99	-2.49	-1.49	-3.42	-1.63	-2.6	-1.84	-1.48	-0.76	-2.75	-3.47	-2.44	-0.99	-3.75	-1.29	0.15	-2.59	-3.21	-3.74	0.48	-999	-1.22	-4.31	-1.16	-1.49	-0.32	-0.89	-3.26	-3.01	-2.39	0.13	-2.35	-0.8	-3.46	-3.31	-1.1	-4.98
-63	-3.16	-3.72	-1.47	-1.22	-1.58	-1.64	-2.89	-1.57	-0.92	-0.58	-2	-2.08	-2.8	-3.06	-4.3	-1.81	-1.41	-2.43	-2.64	-3.82	-1.34	-1.97	-0.24	-1.86	-2.71	-3.59	-6.82	-3.58	-3.33	-3.96	-1.51	-1.42	-4.95	-3.1	-0.57	-5.62	-0.61	-1.37	-1.08	-3.52	-999	-4.58	-3.19	-0.18	-3.23	-4.13	-2.16	-2.03	-3.98
-61	-1.67	-1.72	-3.02	-0.44	-3.62	-3.88	-1.96	-1.04	-1.09	-2.69	-1.08	-2.34	-1.77	-1.82	-1.25	-1.6	-0.95	-2.39	-1.7	-2.49	-1.34	-2.86	-4.42	-2.93	-2	-1.97	-2.65	-2.82	-2.96	-3.61	-1.49	-1.55	-2.01	-2.77	-2.57	-1.64	-3.42	-3.42	-0.95	-9.74	-2.69	-5.31	-5.58	-999	-2.35	-4.21	-3.31	-2.24	-3.3
-59	-0.6	-4.88	-4.15	-3.69	-3.05	-3.04	-3.99	-1.35	-2.27	-3.93	-0.71	-2.43	-2.73	-1.97	-1.83	-2.1	-2.77	-2.51	-2.79	-1.15	-1.87	-2.37	-2.94	-2.64	-4.95	-3.16	-2.71	-4.95	-2.53	-2.97	-1.72	-4.57	-0.83	-0.35	-0.67	-3.51	-999	-1.58	-2.89	-3.49	-2.35	-3.9	-3.9	-2.46	-4.03	-3.09	-0.64	-1.77	-1.73
-57	-2.17	-3.96	0.21	0.04	-0.29	-3.62	-1.06	-0.55	-2.25	-1.97	-2.73	-2.67	-1.47	-1.92	-1.98	-0.08	-1.56	-2.13	-0.22	-0.78	-1.33	-1.38	-2.95	-0.81	-2.31	-0.57	1.86	-1.86	-0.98	-1.66	0.48	-2.38	-1.57	-0.48	-2.4	-3.69	-2.27	-1.61	-2.07	-3.02	-2.37	-2.57	-5.75	-3.84	-2.26	-1.11	-2.16	-1.48	-2.98
-55	-2.8	-3.71	-0.56	-2.81	-2.1	-0.31	-1.46	-1.74	-1.28	-2.12	-1.12	-2.09	-1.66	-1.49	-2.83	-1.6	0.67	-1.08	-1.63	-1.38	-1.81	-2.54	-2.35	-2.54	-5.17	-1.66	-1.2	-2.13	-3.18	-4.18	-1.55	-2.04	-2.08	-2.96	-2.26	-2.44	-3.15	-4.67	-3.74	-3.83	-1.87	-3.11	-2.63	-3.54	-2.96	-2.92	0.06	-1.98	-3.93
-53	-2.37	-2.24	-3.84	-3.07	-3.33	-1.3	-2.29	-2.76	-2.93	-3.1	-1.99	-1.64	-2.1	-2.4	-1.95	0.51	-0.84	-0.76	-1.84	-2.55	-2.53	-1.04	-1.83	-0.81	-1.99	-2.4	-2.41	-1.09	-2.14	-1.96	-1.2	-3.18	-2.81	-2.61	-3.09	-0.56	-0.14	-3.6	-1.22	-2.83	-4.33	-1.5	-3.17	-1.15	-0.94	-1.68	-1.92	-2.24	-2.52
-51	-1.74	-2.17	-2.2	-2.34	-3.04	-1.93	-2.89	-2.31	-0.9	-2.52	-2.81	-0.65	-3.17	-2.24	-1.77	-2.13	-1.37	-1.65	-2.18	-2.33	-0.61	-1.02	-1.29	-1.07	-0.45	-2.95	-1.92	-1.69	-3.01	-2.78	-3.74	-1.85	-1.35	-2.51	-2.17	-2.33	-0.81	-2.03	-1.78	-1.58	-1.85	-3.46	-2.88	-2.53	-1.05	-4.98	-2	-2.51	-1.51
-49	-1.5	-1.86	-1.84	-1.37	-3.01	-1.17	-2.67	-1.69	-0.45	-1.14	-3.27	-1.73	-1.72	-1.46	-0.65	-1.39	-1.23	-1.86	-1.12	-2.54	-0.81	-1.9	-2.57	-1.79	-2.82	-2.37	-2.67	-2.17	-3.08	-2.48	-1.37	-3.16	-2.1	-2.45	-1.7	-1.24	-1.52	-2.47	-0.6	-1.98	-1.42	-3.11	-2.52	-1.54	-0.88	-1.25	-2.8	-2.74	-2.15
-47	-0.09	-1.78	-0.85	-2.48	-1.39	-2.19	-1.19	-2.28	-1.84	-1.64	-1.64	-1.78	-1.32	-2.89	-1.06	-1.1	-1.49	-1.11	-1.28	-1.12	-1.32	-2.07	-2.48	-1.94	-1.5	-1.33	-1.71	-0.71	-1.31	-0.58	-2.73	-2.63	-3.22	-1.34	-1.85	-0.92	-1.03	-1.14	-1.92	-1.95	-2.02	-0.98	-1.58	-1.85	-1.47	-1.18	-1.26	-2.28	-1.85
-45	-1.42	-1.74	-0.11	-2.13	-1.44	-2.25	-2.46	-1.81	-1.38	-0.98	-2.14	-1.69	-1.74	-2.28	-1.81	-2.01	-2.08	-1.97	-2.18	-0.93	-2.13	-1.94	-1.75	-1.68	-1.04	-2.38	-2.67	-3.5	-0.26	-1.96	-2.4	-2.81	-1.78	-2.16	-0.8	-1.61	-1.12	-1.68	-2.28	-2.35	-2.66	-2.62	-3.47	-2.09	-1.42	-0.76	-1.32	-2.33	-1.16
-43	-2.36	-1.97	-1.55	-2.49	-1.66	-2	-2.01	-0.79	-2.44	-1.62	-1.86	-1.84	-0.95	-2.6	-1.24	-2.44	-1.74	-2.74	-1.67	-0.82	-1.97	-1.96	-1.4	-1.66	-1.32	0.12	-2	-1.5	-1.78	0.16	-1.38	-1.7	-2.1	-1.59	-0.19	-1.67	-1.69	-1.71	-1.89	-3.01	-3	-2.23	-2.1	-1.52	-1.34	-1.62	-1.47	-2.72	-0.48
-41	-2.55	-1.71	-0.92	-2.16	-1.48	-2.66	-0.6	-1.14	-2.17	-3.24	-1.72	-1.11	-1.77	-1.48	-1.11	-2.07	-1.79	-2.15	-0.91	-1.02	-2.3	-1.99	-0.88	-2.21	-1.59	-1.14	-1.67	-1.73	-1.95	-1.87	-1.37	-3.26	-2.58	-2.87	-1.36	-1.92	-1.23	-1.17	-0.84	-1.88	-3.49	-2.74	-1.76	-0.71	-1.9	-1.63	-1.91	-1.59	0.2
-39	-1.48	-1.31	-1.75	-1.21	-2.06	-1.49	-2.03	-1.02	-0.35	-1.13	-1.61	-0.14	-2.1	-3.51	-1.09	-1.83	-0.85	-2	-0.7	-1.35	-1.88	-2.66	-1.56	-1.25	-1.91	-2.32	-3.23	-2.1	-3.34	-1.11	-3.17	-1.91	-1.29	-1.62	-2.28	-1.32	-1.48	-0.89	-1.18	-0.92	-1.86	-1.15	-1.82	-1.88	-1.26	-1.45	-1.44	-1.47	-1.45
-37	-2.22	-0.62	-1.43	-1.32	-0.37	-0.46	-1.61	-2.62	-3.4	-2.07	-2.96	-2.13	-0.61	-1.11	-2.52	-1.76	-1.41	-2.42	-1.72	-1.53	-0.73	-1.92	-2.57	-1.3	-1.06	-1.59	-2.2	-1.85	-1.76	-0.95	-0.28	-1.33	1.2	-1.25	-1.84	-0.53	-1.12	-1.44	-1.02	-1.52	-1.15	-2.8	-1.42	-1.46	-0.96	-1.13	-1.41	-1.2	-1.96
-35	-0.71	-2.63	-0.84	-1.2	-2.87	-0.48	-0.97	-0.48	-2.52	-1.43	-1.86	-1.89	-1.08	0.67	-1.27	-2.21	-1.3	-1.79	-1.66	-2.01	-2.03	-1.86	-1.86	-1.37	-1.5	-1.01	-0.86	-2.04	-0.81	-0.56	-1.68	-0.77	-1.35	-2.32	-1.75	-1.5	-1.43	-0.92	-1.99	-1.96	-2.12	-1.84	-1.52	-1.03	-1.78	-1.73	-1.38	-0.48	-1.19
-33	-0.79	-0.3	-0.94	-1.64	-1.41	-1.4	-0.99	-1.52	-1.18	-2.45	-0.31	-0.34	-0.93	-1.23	-1.05	-1.94	0.31	-2.07	-0.35	-0.75	-0.45	-1.62	-1.34	-0.93	-0.97	-0.66	-0.96	-2.74	-1.52	-1.97	-0.61	-1.56	-1.49	-2.28	-2.39	-0.32	-0.69	-2.56	-1.53	-2.74	-1.14	-1.73	-1.6	-1.22	-1.01	-1.93	-1.6	-0.87	-0.98
-31	-2.03	-2	-1.39	-0.83	-1.99	-1.68	-2.66	-1.98	-3.39	-1.25	-1.97	-1.51	-0.82	-0.24	-2.08	-1.29	-0.81	-1.41	-1.13	-0.13	-1.22	0.18	0.17	-1.32	-1.54	-0.47	-1.49	-3.53	-1.12	-0.66	-2.78	-4.16	-1.02	-0.63	-0.99	-1.07	-3.66	-2.18	-3.85	-2.66	-1.39	-1.72	-2.22	-1.02	-1.16	-1.8	-1.48	-1.05	-1.09
-29	-2.42	-2.44	-1.09	-0.86	-1.05	-1.49	-0.57	-1.72	-2.62	-1.69	-1.17	-1.37	-1.93	-0.78	-1.29	0.54	-2.42	0.38	-0.47	-0.91	-2.99	-1.07	1.25	-0.05	-0.52	-1.67	-0.05	-1.19	-0.86	-3.25	-2.23	-0.63	0.67	-2.67	-2.51	-1.8	-1.69	-1.52	-1.62	-2.76	-1.87	-1.85	-1.04	-2.02	-0.71	-1.67	-0.61	-1.44	-1.06
-27	-0.4	0.01	0.43	-0.66	-1.55	-0.68	0.31	-0.51	-3.29	-0.96	-1.33	-1.09	-0.21	-2.22	0.3	-1.69	-1.19	-1.05	-1.01	-0.56	0.66	-0.01	-0.78	0.22	-0.42	-2.45	0.37	0.3	1.99	0.26	-1.3	-0.35	-2.11	-2.51	-1.62	-1.54	-2.4	-2.42	-1.7	-1.24	-1.36	-2.28	-1.05	-1.6	-0.63	-2.1	-0.84	-1.02	-1.71
-25	-0.52	-2.31	0.29	-0.39	-1.21	-1.38	0.11	-1.52	-1.51	-0.33	-0.41	-2.68	-0.26	-0.6	-0.73	-0.32	-0.91	-2.41	-2.53	-1.52	-1.75	-0.04	0.63	-1.81	-1.17	-1.4	0.31	1.22	-3.43	-0.35	-0.66	-1.1	-1.26	-1.58	-1.51	-3.69	-2.04	-2.93	-1.26	-2.32	-1.87	-1.64	-1.34	-1.75	-1.68	-2.18	-2.14	-0.9	-1.9
-23	-0.74	-0.05	-0.56	0.21	-0.16	-1.36	-0.09	-0.73	-0.27	-0.41	-1.88	-0.81	-0.52	0.4	-0.57	-0.12	0.35	-0.32	0.93	1.17	0.36	0.21	-1.54	-1.54	0.35	-0.99	-0.47	-1.59	-3.55	-1.7	-2.63	-2.22	-1.44	-2.3	-2.54	-1.34	-1.74	-2.68	-2.94	-2.75	-2.46	-2.5	-2.08	-0.93	-2.3	-1.94	-3.38	-1.25	-2.26
-21	-2.46	-0.22	-3.39	-0.7	0.16	-0.11	-1.43	0.23	-1.73	-2.25	-0.71	0.01	-1.54	0.96	-0.05	-4.83	0.08	0.3	-0.38	-0.95	-1.34	0.15	0.04	-3.14	-1.91	-1.55	-0.81	0.39	-1.83	-0.51	-0.76	-0.85	-2.61	-1.41	-2.05	-2.92	-1.45	-3.01	-1.97	-0.52	-1.29	-1.36	-2.95	-0.85	-2.92	-1.82	-3.54	-1.67	-2.01
-19	-3.42	-0.21	0.99	-1.22	-3.08	-0.17	-2.53	-1.24	0.42	-0.17	0.08	2.05	1.51	0.37	1.01	0.02	0.89	-1.32	-0.25	0.21	-2.56	-1.74	1.54	-1.07	-0.42	-0.14	-1.04	0.41	-1.49	-2.43	0.19	-1.49	-1.15	-2.13	-2.21	-2.41	-2.86	-2.22	-3.82	-0.74	-1.18	-1.84	-1.48	-0.77	-2.09	-2.72	-3.58	-1.98	-1.72
-17	-0.36	0.6	0.66	-0.65	0.75	0.37	0.94	0.78	0.97	0.09	0.54	-3.44	0.84	0.54	-1.14	0.39	1.38	-0.27	0.48	1.48	-0.87	-1.2	-0.28	-1.19	0.43	0.48	-1.53	-1.3	-2.75	-1.04	-3.03	-1.77	-4.01	-3.2	-2.28	-2.18	-2.88	-2.26	-1.05	-1.79	-2.38	-2.64	-0.28	-1.01	-3.21	-3.37	-2.85	-1.75	-2.11
-15	-0.24	0.17	-2.53	0.18	-0.28	-0.41	-0.27	0.57	0.81	-0.14	-0.28	-1.39	-0.83	-0.99	-0.24	0.77	1.2	1.13	-0.77	0.24	-0.42	-2.12	-1.88	-0.45	-0.41	-2.07	-1.94	-2.75	-4.06	-3.52	-1.7	-2.56	-2.93	-0.66	-2.51	-1.36	-1.96	-3.65	-2.95	-2.49	-2.44	-0.47	-1.97	-3.31	-4.54	-2.15	-2.62	-2.32	-2.24
-13	0.96	-2	-0.15	-0.19	0.92	0.64	1.21	-0.99	0.3	-0.41	-0.09	0.58	0.9	-0.81	-0.91	-0.6	0.62	0.05	-0.77	-0.37	-2.38	-0.87	-2.46	-1.68	0.14	-2.11	-2.62	-2.95	-2.8	-3.04	-2.86	-3.65	-2.54	-2.75	-2.28	-2.55	-3.01	-3.01	-2.61	-2.39	-2.34	-1.55	-4.04	-3.82	-3.02	-2.14	-2.65	-2.06	-2.33
-11	-1.78	2.09	-0.24	-0.74	0.86	1.83	-0.83	0.89	0.02	1.6	0.33	-0.14	-1.74	-0.54	-0.41	0.5	-1.52	-0.16	-2.38	-1.27	-0.29	-0.39	-2.65	-1.2	-1.22	-2.07	-1.5	-2.26	-0.78	-3.44	-1.62	-2.03	-3.39	-2.7	-1.58	-3.16	-2.09	-2.57	-4.11	-1.96	-1.99	-0.39	-5.02	-2.51	-2.6	-2.69	-2.34	-2.6	-2.24
-9	0.82	0.36	-0.11	-0.57	2	-0.3	0.23	1	-0.34	0.1	0.3	0.69	-0.51	-0.68	-1.35	-1.01	-0.84	-0.92	-1.34	-0.86	-0.47	-5.18	-2.45	-4.11	-1.01	-2.71	-2.83	-3.95	-3.84	-3.02	-3.91	-2.55	-1.79	-3.05	-2.53	-3.34	-1.94	-2.52	-2.79	-2.28	-1.48	-2.9	-4.6	-1.83	-2.68	-1.94	-2.28	-2.19	-2.45
-7	0.38	0.39	-0.67	-0.78	-0.79	0.15	-2.28	-0.12	0.65	-0.08	-0.58	-0.08	-1.19	-0.69	-0.63	-1.17	0.24	-0.76	-1.21	-0.88	-1.55	-4.05	-0.54	-2.26	-3.31	-2.57	-3.35	-1.79	-2.68	-2.41	-2.24	-2.95	-1.97	-2.49	-1.96	-2.37	-2.99	-3.14	-1.91	-2.06	-0.84	-3.43	-2.47	-2.64	-1.95	-2.03	-2.26	-1.77	-1.34
-5	-1.58	0.61	-0.13	-1.01	-0.51	-0.36	-1.19	-1.04	-0.5	-1.35	-1.35	-0.82	-1.17	-0.28	-2.42	-0.53	-1.11	-1.03	-0.89	-0.17	-3.11	-2.54	-1.88	-2.88	-0.76	-1.51	-2.14	-0.56	-1.52	-1.65	-2.32	-2.68	-2.3	-2.57	-1.49	-1.93	-2.15	-2.16	-1.77	-1.91	-2.04	-2.32	-2.18	-2.45	-2.37	-2.1	-2.19	-1.86	-1.44
-3	0.69	-1.39	-0.66	1.48	-1.57	-1.14	-1.76	0.14	-2.79	-1.7	-1.98	-4	-1.69	-1.93	-1.15	-1.74	-1.47	-3.02	-1.6	-1.23	-1.12	-2.4	-1.74	-2.33	-2.68	-1.92	-1.39	-2.06	-2.76	-2.12	-2.86	-1.92	-2.17	-1.85	-2.11	-2.78	-1.76	-2.1	-1.32	-2.41	-2.47	-1.99	-2.16	-2.64	-1.98	-2	-1.48	-1.45	-1.66
-1	-0.22	0.04	0.81	0.71	-0.56	-1.76	-2.45	-1.66	-1.51	-2.19	-2.79	-2.01	-0.93	-1.99	-2.7	0.25	-2.46	-1.24	-0.59	-1.78	-1.22	-1.56	-2.16	-1.29	-1.79	-1.63	-1.54	-2.17	-1.69	-1.85	-1.42	-2.5	-1.63	-1.45	-1.55	-2.34	-1.46	-1.78	-0.77	-2.57	-2.17	-2.27	-1.93	-2.05	-1.78	-1.81	-1.1	-1.24	-1.66
1	-1.49	-1.37	-1.72	-0.76	-1.67	-3.08	-1.9	-1.41	-0.78	-1.06	-0.71	-0.46	-1.87	-1.18	-2.04	-1.11	-2.37	-0.22	-1.6	-1.26	-0.82	-1.88	-1.57	-2.7	-1.16	-2.7	-0.95	-2.16	-1.53	-1.63	-1.79	-1.87	-1.63	-1.46	-1.58	-1.49	-1.69	-1.95	-1.31	-1.12	-3.42	-3.03	-2.62	-1.92	-1.98	-2.08	-1.62	-1.6	-1.75
3	0.58	0.32	0.1	0.31	0.45	-1.21	-0.64	-1.5	-0.89	-0.6	-0.98	1.03	-1.45	-1.24	-0.9	-0.41	-1.42	-2.06	-1.03	-0.56	-2.03	-1.6	-1.99	-1.26	-1.33	-0.82	-1.4	-1.25	-1.69	-1.41	-1.6	-2.16	-2.01	-1.1	-1.25	-1.7	-1.22	-1.54	-2.03	-0.99	-3.17	-2.84	-3.26	-2	-2.3	-1.98	-2.3	-1.89	-1.79
5	-0.17	0.21	-1.41	0.95	0.05	-0.72	-1.75	-0.09	-1.28	0.47	-0.93	-0.11	-0.93	-2	-0.58	-1.2	-1.98	-0.35	-0.78	-2.27	-1.43	-1.7	-0.19	-1.49	-1.67	-0.37	-1.32	-1.96	-1.71	-1.88	-1.41	-1.25	-1.35	-1.67	-0.93	-1.45	-0.58	-0.12	-0.88	0.17	-0.75	-3.38	-2.75	-2.19	-1.86	-1.51	-3.03	-2.22	-2.18
7	-0.3	-0.77	-2.26	-2.11	-1.39	-0.29	-2.04	0.42	0.52	-1.05	-1.07	0.29	-1.92	-1.46	-0.39	0.02	-1.39	-1.55	-1.77	-0.26	-1.08	-1.75	-0.29	-0.65	-1.67	-1.44	-0.92	-1.3	-1	-0.86	-1.28	-1.55	-2.42	-1.58	0.04	0.43	-0.24	-1.31	-1.12	-1.61	-2.53	-2.72	-3.51	-1.98	-2.39	-1.37	-2.47	-1.91	-2.41
9	-0.35	-1.43	-0.15	-1.26	-1.52	0.19	-0.83	-1.42	0.03	-0.79	-0.74	-1.21	-1.15	-0.29	-1.1	-2.37	-1.37	-1.1	-0.85	-1.12	-0.93	-1.61	-3.01	-1.3	-1.53	-1.16	-0.76	-1.79	0.69	0.87	-1.62	-0.81	-0.18	-0.51	-1.1	-0.58	-0.78	-0.74	-1.97	-1.96	-2.22	-2.41	-2.65	-2.71	-2.16	-1.66	-2.17	-2.53	-1.45
11	-0.36	0.06	0.36	-2.03	-1.47	-0.83	-0.76	-1.4	-0.7	-0.13	-1.3	-0.93	0.48	-0.97	-1.62	-1.52	-0.65	-1.31	-2.98	-1.97	-0.93	-1.68	-1.71	-1.3	-1.08	-1.48	-1.35	-0.74	-0.06	-1.33	-0.1	0.42	0.3	-0.52	-0.4	-1.42	-1.04	-2.17	-2.47	-1.46	-1.72	-2.13	-2.18	-2.31	-1.92	-2.67	-2.18	-1.69	-0.15
13	0.01	-1.53	-0.99	-1.27	-1.11	-2.76	-0.66	-2.06	-1.65	-1.11	-0.73	-1.8	-1.51	-1.64	-2.41	-2.16	-1.1	-1.11	-1.66	-0.68	-1.91	-1.08	-1.79	-2.3	-1.33	-0.05	-1	-0.7	-1.25	-1.67	0.04	-0.15	0	-1.29	-1.62	-0.04	-1.63	-2.16	-3.02	-1.75	-1.05	-0.87	-1.1	-1.32	-0.77	-0.6	-0.35	-0.98	-0.77
15	-1.28	-1.21	-1.35	-1.51	0.06	0.11	-1.78	-1.46	-1.43	-1.39	-1.75	-0.29	-2.08	-2.11	-1.28	-2.48	-2.39	-1.44	-1.55	-1.79	-1.18	-1.75	-1.49	0.12	-1.8	-1.26	-1.17	-1.34	-0.73	-1.44	0.29	0.48	0.48	-0.05	-1.69	-1.55	-2.87	-2.46	-2.67	-0.84	-1.85	0.46	0.11	-0.65	-0.65	0.24	-0.67	-0.86	-1.49
17	-0.84	-1.44	-0.91	-2.22	-1.14	-0.52	-1.43	-1.07	-3.03	0.23	-0.84	-1.7	-0.73	-2.48	-1.68	-1.05	-1.4	-1.74	-1.53	-2.54	-2.7	-2.82	-1.9	-1.85	-1.57	-1.85	-1.33	-1.06	-0.82	-2.58	-0.51	-1.21	-2.12	-2	-2.22	-1.73	-2.41	-1.14	-0.82	-0.31	-1.57	-1.56	-0.47	-0.95	-1.44	-2.26	-0.02	-3.48	-0.97
19	-1.41	-1.66	-1.09	-2.04	-1.57	-2.14	-1.96	0.73	-1.4	-1.31	-2.62	-2.22	-1.97	-1.2	-3.37	-1.41	-2.54	-1.95	-3.05	-1.47	-2.23	-1.64	-2.47	-2.12	-2.55	-2.15	-1.7	-1.7	-1.26	-0.59	-1.48	-2.21	-2.01	-2.65	-1.54	-1.67	-2.06	-0.31	0.23	-1.36	-1.37	-0.75	-2.01	-1.88	-2.47	-1.87	-1.28	0.35	-0.26
21	-1.05	-0.76	-0.99	0.04	-2.67	-0.37	-3.12	-0.8	-0.79	-2.71	-2.09	-1.78	-2.12	-1.97	-2.72	-1.55	-1.25	-2.54	-2.86	-1.67	-1.52	-2.34	-2.32	-2.49	-2.12	-2.19	-1.46	-2.28	-2.81	-1.23	-2.65	-3.24	-2.49	-2	0	-0.96	-1.78	-1.57	-1.2	-0.45	-1.69	-1.74	-1.36	-0.57	-1.25	-1.77	-1.49	-2.4	-1.36
23	-0.78	-1.89	-1.53	-1.2	-0.68	1.09	-1.01	-2.55	-2.56	-2.6	-0.66	-1.54	-0.25	-1.17	-2.71	-2	-2.74	-2.89	-1.66	-1.47	-1.42	-1.86	-2.07	-2.42	-2.35	-2.14	-2.29	-1.98	-1.6	-1.03	-2.67	-3.01	-1.96	-1.15	-0.82	-1.36	-0.39	-1.25	-1.94	-1.59	-1.93	-0.89	-1.41	-0.94	-0.17	-1.41	-0.45	-1.1	-0.3
25	-0.89	-2.74	-1.5	-0.12	-1.55	-1.11	-1.9	-1.9	-0.69	-1.67	-1.42	-2.02	-1.96	-2.26	-1.93	-3.08	-3.37	-3.45	-2.58	-1.75	-1.28	-1.5	-2.85	-2.02	-2.52	-1.87	-2.4	-1.43	-0.78	-1.86	-2.98	-2.63	-2.09	-1.16	-2.84	-0.43	-0.34	-1.35	-0.52	-2.07	-1.54	-0.81	-0.53	0.17	-1.31	-2.49	-2.6	-0.68	0.39
27	-1.78	-2.52	-1.57	-1.13	-1.51	-1.79	-1.54	-0.92	-1.04	-0.85	-1.07	-0.96	-0.37	-1.5	-2.89	-2.58	-2.4	-1.94	-1.78	-1.7	-3.14	-1.64	-1.92	-2.44	-2.1	-1.67	-1.71	-1.55	-1.5	-2.57	-2.55	-2.31	-2.32	-1.39	-1.03	-0.91	-0.6	-1.43	-1.85	-1.81	-1.6	-0.15	-0.4	-3.19	-1.31	-1.2	-0.91	-0.31	-0.6
29	-1.87	-0.75	-0.83	-1.65	-4.46	-1.01	-0.96	-0.61	-3	-1.03	-2.96	-1.88	-1.65	-1.23	-2.09	-2.24	-1.89	-1.31	-2.07	-1.47	-1.53	-1.47	-2.51	-2.14	-2.33	-1.97	-1.89	-1.61	-2.03	-2.71	-2.24	-2.4	-2.32	-2.22	-2.1	-2.08	-1.24	-1.76	-1.72	-2.07	-1.58	-1.92	-0.47	-0.75	-0.8	0.26	-0.64	-1.11	-1.39
31	-1.06	-2.05	-1.32	-1.8	-3.3	-1.78	-0.83	-0.36	-1.51	-1.45	-1.31	-1.93	-1.35	-2	-1.6	-2.56	-1.75	-1.72	-2.85	-2.27	-2.76	-1.75	-2.51	-2.18	-2.31	-1.83	-1.83	-2.11	-2.31	-2.28	-2.54	-2.72	-2.65	-2.58	-2.33	-2.22	-1.76	-1.86	-1.91	-1.92	-2.05	-3.18	-2.72	-1.22	0.21	-0.99	-2.25	-1.84	-1.31
33	-0.22	-3.79	-2.4	-1.7	-1.66	-0.67	-2.65	-2.11	-1.87	-2.16	-2.19	-1.84	-1.96	-1.89	-1.5	-2.3	-2.07	-2.47	-2.25	-2.04	-2	-2.69	-1.97	-1.77	-1.89	-1.49	-1.65	-1.75	-2.12	-2.47	-2.77	-2.87	-2.79	-2.47	-2.29	-2.08	-2.11	-2.18	-1.88	-1.8	-1.04	-1.42	-2.95	-0.58	-0.12	-2.02	0.5	-2.07	1.13
35	-1.87	-2.14	-2.28	-2.98	-1.91	-1.78	-1.83	-1.84	-1.53	-1.88	-1.45	-0.58	-1.76	-1.45	-2.24	-1.54	-1.62	-1.74	-1.14	-1.75	-1.68	-1.62	-2.1	-1.95	-2.06	-1.86	-1.72	-2.1	-2.54	-2.34	-2.7	-2.85	-2.75	-2.43	-2.29	-2.03	-1.86	-2.32	-1.9	-1.88	-1.6	-1.68	-2.44	-3.38	-0.79	-1.11	-2.32	-0.95	-2.06
37	-2.59	-1.61	-1.8	-1.87	-3.19	-1.92	-2.76	-2.02	-1.78	-1.84	-1.82	-2.06	-1.58	-1.75	-2.51	-1.81	-2.27	-1.91	-2.02	-3.36	-2.23	-2.24	-1.19	-2.06	-1.44	-1.57	-1.43	-2.07	-2.86	-2.51	-3.24	-2.87	-2.61	-2.58	-2.36	-2.41	-1.85	-2.12	-2.14	-2.6	-1.99	-1.99	-1.39	-2.26	-2.11	-3.16	-2.48	-0.91	-3.04
39	-1.95	-1.53	-1.25	-1.04	-2.05	-2.42	-2.02	-1.39	-1.87	-1.17	-2.41	-1.61	-1.53	-2.38	-2.88	-3.56	-2	-2.22	-2.03	-2.3	-1.82	-1.97	-1.68	-1.31	-1.86	-1.95	-2.67	-1.82	-2.78	-2.58	-3.11	-2.52	-2.5	-2.25	-1.9	-1.87	-1.96	-1.97	-2.12	-2.81	-1.8	-1.84	-1.84	-1.94	-1.68	-2.16	-2.75	-4.09	-1.79
41	-1.8	-3.41	-2.3	-2.65	-2.13	-2.44	-3.73	-2.05	-1.89	-2.1	-1.64	-2.2	-2.54	-1.41	-3.08	-2.19	-2.83	-1.82	-1.58	-1.22	-1.65	-1.57	-2.26	-2.06	-2.02	-2.06	-2.58	-2.12	-3.17	-3.04	-3.25	-2.79	-2.42	-2.29	-2.12	-2.01	-2.29	-2.25	-2.21	-2.14	-2.64	-1.74	-1.94	-2.51	-2.08	-1.52	-2.19	-2.97	-1.16
43	-2.14	-2.54	-2.79	-4.07	-2.17	-2.82	-1.49	-1.91	-2.3	-1.69	-2.09	-1.65	-1.6	-2.02	-2.09	-1.84	-1.53	-1.13	-1.68	-2.33	-1.5	-1.46	-2.65	-2.52	-2.39	-2.09	-1.92	-2.83	-2.75	-2.89	-2.48	-2.5	-2.27	-2.08	-1.97	-1.88	-1.94	-2.19	-2.15	-2.28	-2.53	-2.3	-2.05	-1.65	-1.76	-1.95	-2.31	-1.38	-1.85
45	-2.21	-2.28	-1.91	-2.41	-2.41	-2.13	-2.58	-2.31	-1.68	-1.15	-1.37	-1.32	-1.42	-2.92	-1.37	-1.26	-1.24	-2.1	-2.2	-2.5	-2.11	-1.9	-1.85	-2.13	-2.26	-2.38	-2.57	-2.93	-1.97	-2.71	-2.44	-2.68	-1.95	-1.89	-2	-2.08	-1.98	-2.52	-1.17	-1.9	-1.61	-2.56	-2.74	-1.77	-2.15	-1.12	-1.55	-0.97	-1.87
47	-3.21	-1.36	-2.47	-1.99	-1.7	-2.48	-1.88	-1.22	-1.52	-2.17	-2.07	-2.15	-1.87	-1.19	-0.95	-1.94	-2.53	-1.93	-0.73	-2.73	-1.67	-1.3	-1.27	-1.11	-2.26	-1.9	-2.41	-2.69	-2.06	-2.17	-2.35	-2.34	-2.25	-1.92	-2.09	-2.4	-2.24	-1.94	-2.44	-1.83	-2.28	-2.12	-2.17	-2.29	-2.39	-2.28	-1.81	-0.86	-2.42
49	-2.1	-2.19	-3.09	-2.18	-2.08	-1.71	-2.43	-1.87	-2.34	-1.98	-2.08	-2.73	-2.25	-2.04	-2.53	-1.9	-1.36	-2.06	-1.73	0.22	-2.05	-0.91	-2.25	-2.51	-1.41	-2.32	-2.5	-2.44	-2.3	-2.46	-2.29	-1.9	-2.42	-1.81	-2.22	-3.34	-3.01	-2.26	-2.21	-2.36	-2.31	-2.67	-2.64	-2.57	-2.84	-2.43	-2.4	-1.76	-1.91
51	-1.21	-2.5	-2.99	-2.03	-1.21	-2.62	-2.66	-2.97	-2.44	-2.37	-1.99	-1.92	-1.49	-1.67	-1.63	-0.82	-1.84	-0.97	-2.04	-1.72	-1.46	-1.81	-2.85	-2.78	-2.98	-2.76	-2.68	-2.76	-2.2	-2.14	-1.93	-2.8	-2.31	-2.4	-3.3	-2.76	-2.45	-2.46	-1.65	-1	-1.72	-2.45	-1.56	-2.8	-3.32	-2.56	-3	-2.92	-2.22
53	-1.77	-3.55	-3.18	-3.33	-1.75	-1.8	-1.82	-1.34	-2.17	-1.98	-0.31	-1.65	-1.48	-2.7	-1.56	-2.08	-1.5	-2.39	-2.09	-2.08	-2.81	-1.51	-2.6	-3.04	-2.86	-3.02	-3.05	-3.2	-2.73	-2.58	-2.32	-2.18	-2.66	-3.03	-1.82	-2.73	-2.52	-2.63	-1.89	-1.91	-2.3	-1.62	-2.34	-2.85	-2.93	-2.24	-3	-2.74	-3.22
55	-2.57	-2.4	-3.03	-2.43	-1.95	-1.45	-1.97	-1.95	-2.52	-2.64	-2.25	-1.81	-1.34	-2.54	-2.48	-3.27	-1.65	-2.4	-2	-2.46	-2.1	-2.51	-3.21	-3.13	-2.33	-3.01	-2.83	-2.57	-2.78	-2.41	-1.75	-2.57	-1.48	-2.48	-1.91	-2.08	-1.72	-2.37	-2.02	-1.73	-2.24	-2.59	-2.26	-2.49	-2.34	-3.74	-2.45	-2.63	-2.53
57	-1.82	-1.92	-0.98	-1.4	-0.74	-2.8	-2.59	-1.2	-2.54	-1.98	-2.06	-1.64	-1.27	-2.1	-2.7	-2.36	-2.02	-2.01	-2.93	-2.87	-3.76	-3.05	-3.3	-2.54	-2.4	-2.56	-3.08	-2.26	-2.85	-2.29	-2.71	-1.36	-2.75	-2.38	-1.74	-1.91	-2.5	-2	-1.47	-1.43	-2.02	-1.27	-2	-1.3	-2.14	-1.82	-1.99	-1.43	-2.01
59	-2.15	-1.44	-1.41	-1.2	-1.62	-3.55	-0.91	-2.05	-2.43	-2.85	-2.9	-3.44	-1.44	-2.57	-2.73	-2.83	-2.41	-2.93	-3.23	-3.46	-2.99	-2.24	-2.64	-1.54	-3.1	-2.23	-2.13	-2.49	-2.26	-3	-3.06	-2.24	-1.69	-1.99	-1.92	-1.34	-1.24	-0.7	-1.79	-1.68	-1.38	-1.6	-1.51	-1.82	-2.38	-1.35	-1.64	-1.61	-1.4
61	-2.11	-3.45	-2.43	-1.93	-1.53	-1.57	-1.52	-2.31	-2.33	-1.89	-1.99	-2.76	-3.88	-3.22	-2.7	-2.57	-2.93	-2.22	-2.6	-3.37	-2.47	-3.03	-0.12	-1.99	-2.37	-2.42	-2.98	-2.75	-2.14	-2.36	-1.16	-1.75	-1.83	-0.9	-1.43	-1.6	-1.41	-1.69	-1.95	-1.73	-2.06	-1.81	-1.26	-1.54	-0.96	-1.33	-1.05	-1.43	-1.04
63	-1.98	-1.34	-1.32	-1.41	-1.98	-0.71	-1.89	-1.73	-3.13	-2.39	-2.36	-2.39	-3.29	-2.74	-2.59	-3.04	-2.73	-2.35	-3.01	-2.67	-3.34	-2.7	-2.61	-1.86	-1.75	-1.98	-1.77	-1.69	-1.78	-1.08	-1.44	-0.76	-1.8	-0.64	-2.29	-1.28	-0.27	-1.78	-1.92	-0.86	-0.88	-2.1	-1.89	-1.62	-1.73	-1.57	0.03	-0.95	-1.61
65	-1.63	-1.5	-1.79	-2.09	-0.97	-2.15	-1.83	-2.08	-2.51	-2.49	-1.57	-2.33	-4.43	-2.57	-2.22	-2.83	-2.08	-1.41	-3.39	-2.96	-3.58	-2.94	-1.85	-2.04	-1.75	-1.33	-0.78	-1.28	-1.58	-0.88	-1.55	-1.68	-0.67	-1.69	-0.99	-1.2	-1.43	-1.39	-1.29	-0.84	-1.73	-1.14	-1.36	-0.72	-1.35	-0.43	0.15	0.35	-2.63
67	-0.81	-2.82	-1.75	-2.12	-2.24	-1.52	-2.31	-1.54	-2.47	-2.51	-2.75	-2.87	-2.18	-1.51	-2.05	-3.05	-3.38	-2.13	-1.56	-1.26	-0.65	-2.5	0.47	-1.21	-0.9	-1.8	-1.78	0.1	-1.57	-0.78	-0.82	-1.49	-2.05	-1.3	-0.96	-1.72	-1.77	-1.48	-0.71	-1.4	-1.62	-1.27	-1.54	-1.43	-1.44	-1.44	-1.67	-0.79	-1
69	-1.78	-2.9	-1.67	-1.29	-1.84	-1.46	-1.74	-2.15	-1.98	-1.53	-1.87	-1.34	-1.59	-1.61	-1.47	-2.5	-1.73	-2.05	-2.01	-2.11	-1.55	-1.34	-2.76	-0.96	-1.19	-0.31	-1.9	-1.29	-1.82	-1.42	-1.15	-1.13	-2.3	-0.64	-0.06	-0.17	-1.63	-0.85	-1.11	-1.35	-0.67	0.38	-1.38	-1.96	-1.96	-2.39	-1.89	-0.83	-0.81
71	0.08	-1.28	0.03	-0.73	-0.54	0.74	-1.56	-1.71	-1.5	-2	-1.81	-1.84	-1.76	-3.39	-1.33	-1.42	-1.46	-1.47	-1.47	-0.83	-1.26	-1.32	-1.39	-0.66	-1.45	-1.71	-2.15	-1.57	-2.5	-1.05	-1.17	-0.64	-0.3	-1.64	-1.28	-0.12	-0.66	-0.61	-1.73	-1.01	-1.42	-1.8	-1.45	-0.52	-0.75	1.01	-2.85	-0.74	-0.96
73	-0.94	-0.95	-0.98	0.14	-0.83	-0.48	-1.06	-0.57	-0.83	0.15	-1.63	-1.05	-1.19	-0.75	-0.94	-1.92	-1.28	-1.08	-0.84	-1.12	-1.27	-2.28	-0.86	-1.27	-1.8	-3.11	-1.63	-0.88	-0.89	-1.88	-1.4	-1.56	-2.04	-2.64	-1.45	0.2	-0.87	-1.5	-1.3	0.06	-1.17	-1.73	-1.02	-1.64	-0.94	-0.68	-0.88	-0.91	-0.97
75	-1.45	-1.39	-2.04	-1.57	-2.06	-1.43	-0.93	0.01	-0.42	-1.35	-1.86	-0.08	0.28	-1.7	-2.1	-0.75	-1.12	-1.37	-1.93	-2.55	-2.46	-1.15	-1.52	-0.53	-1.47	-1.8	-0.86	-3.46	-1.24	-1.36	-1.16	-1.58	-0.92	-0.43	0.24	-2.25	-1.48	-2.4	-0.6	-1.76	-1.55	-1.21	-1.19	-0.83	-2.37	-1.89	-2.59	-1.59	-2.34
77	-1.47	-0.35	-1.08	-0.78	-1.68	-1.66	-0.88	-0.73	-1.27	-0.83	-2.04	-2.03	-2	-1.67	-2.09	-2.96	-1.8	-1.18	-3.38	-2.82	-1.59	-0.65	-0.19	-1.42	-1.14	-1.01	-1.23	-1.66	-2.17	-1.24	-1.7	-1.3	-1.65	-1.07	-0.35	-0.12	-1.12	-2.04	-2.6	-1.33	-2.21	-1.87	-0.95	-0.56	-1.97	-1.63	-3.04	-3.7	-0.96
79	-2.3	-1.89	-2.57	-999	-0.73	-0.93	-3.44	-2.57	-1.15	-2.32	-1.44	-0.71	-4.1	-2.69	-2.8	-999	1.65	-0.85	-0.33	-999	-999	-3.46	-999	2.54	0.65	-0.48	-0.12	-2.25	-0.53	-1.15	-1.24	-1.24	-3.06	-1.25	-1.01	-1.85	-2.19	-2.74	-1.53	-1.42	-3.04	-1.88	-1.02	-0.2	-1.02	-3.23	-2.51	-3.53	-5.03
81	-999	-999	-999	-999	-999	-1.79	-999	-999	-999	-999	-999	-999	-999	-999	-999	-999	-999	-999	-999	-999	-999	-999	-999	-999	-999	-999	-999	-999	-999	-999	-999	-999	-999	-0.81	-1.37	-1.89	-0.54	-1.27	-1.43	-3.18	-1.33	-1.94	-2.11	-2.68	-0.92	-1.27	-1.51	-0.83	-1.11
83	-999	-999	-999	-999	-999	-999	-999	-999	-999	-999	-999	-999	-999	-999	-999	-999	-999	-999	-999	-999	-999	-999	-999	-999	-999	-999	-999	-999	-999	-999	-999	-999	-999	-999	-999	-999	-999	-999	-999	-5.07	-999	-1.28	-999	-4.37	0.74	-0.27	-1.26	-999	-999
85	-999	-999	-999	-999	-999	-999	-999	-999	-999	-999	-999	-999	-999	-999	-999	-999	-999	-999	-999	-999	-999	-999	-999	-999	-999	-999	-999	-999	-999	-999	-999	-999	-999	-999	-999	-999	-999	-999	-999	-999	-999	-999	-999	-999	-999	-999	-999	-999	-999
87	-999	-999	-999	-999	-999	-999	-999	-999	-999	-999	-999	-999	-999	-999	-999	-999	-999	-999	-999	-999	-999	-999	-999	-999	-999	-999	-999	-999	-999	-999	-999	-999	-999	-999	-999	-999	-999	-999	-999	-999	-999	-999	-999	-999	-999	-999	-999	-999	-999
89	-999	-999	-999	-999	-999	-999	-999	-999	-999	-999	-999	-999	-999	-999	-999	-999	-999	-999	-999	-999	-999	-999	-999	-999	-999	-999	-999	-999	-999	-999	-999	-999	-999	-999	-999	-999	-999	-999	-999	-999	-999	-999	-999	-999	-999	-999	-999	-999	-999
[truncated: 95 more columns]

## Sheet: Fig5
lat (deg N) \ pressure (hPa)	90	200	500	800
-70.65	855.789	201.561	34.7609	26.2766
-69	895.436	221.798	34.3261	24.7666
-64.233	871.065	216.284	36.1275	25.6706
-54.5	1019.96	218.312	39.1466	28.0363
-45.044	880.247	216.615	41.5394	30.1027
-37.68	573.296	198.769	45.222	33.5487
-21.06	204.614	53.061	52.9862	31.0854
-18.13	161.656	30.6205	42.3191	26.3155
-14.23	144.44	24.6446	33.3536	17.6721
-7.98	183.923	54.7645	52.3674	41.5938
-7.5	132.954	37.2246	40.5654	28.026
-5.84	180.636	45.2774	46.9531	30.6526
-1.267	155.63	58.5986	45.5804	23.4032
-0.92	156.146	45.1897	39.525	22.278
5.81	166.702	40.1856	42.7341	28.3976
19.43	250.302	49.3914	49.1575	33.9934
22.31	171.764	59.704	57.5043	52.7417
26.2	194.231	60.4362	58.7304	50.8469
31.6	263.125	85.6396	63.7796	57.3171
34.72	478.418	148.864	60.3518	60.9877
36.1	505.971	177.56	68.2812	61.658
37.933	549.933	173.282	62.6396	63.13
40	610.53	193.79	59.1101	-999
40.45	648.748	200.233	63.1242	61.4348
41.05	636.208	204.713	60.1808	58.012
43.1	882.402	322.256	72.8579	60.7102
46.49	797.669	253.736	65.7701	61.6749
47.8	817.144	258.288	65.595	61.5232
50.8	888.606	287.968	67.4398	61.7714
52.1	939.593	306.951	68.5092	61.9427
52.21	951.076	312.494	68.8392	62.6983
52.4	962.166	315.758	68.936	62.3991
53.32	1070.87	365.035	68.9613	55.2999
53.55	984.499	322.616	64.6069	53.8409
58.75	1164.69	391.804	67.732	55.0663
60.13	1085.91	370.483	69.394	58.3941
70.5	1214.62	414.912	69.0697	54.9556
74.72	1310.6	462.41	70.6503	55.3553
78.933	1262.89	442.135	70.4432	55.2267
80.05	1315.91	472.106	70.7969	54.5816
82.5	1301.17	466.179	71.5978	55.3972
