# Supplementary material for: Advances in representing interactive methane in ModelE2-YIBs(version 1.1)
Source: Copernicus journal article supplement (doi:10.5194/gmd-2018-85), 2018-05-18
Supplement: Supplementary file 2 [file dataset2_gridded_natural_methane_fluxes.xlsx]

## Sheet: README
	This file contains, for each model grid cell, the annual magnitude of: (1) methane emissions for each natural source sector and (2) methane uptake by soils.
	The tab labels indicate the sector: lake, ocean, termites, terrestrial geological, wetlands, and soil sink.
	The soil sink data are positive values, indicating the annual magnitude of methane uptake by soils.
	For each tab, the top row indicates the longitude (degrees E) and the first column indicates the latitude (degrees N).
	Units = 1 x 10^-14 kg CH4 m-2 s-1
	These data are used as the natural methane inventory applied to simulation E2005.

## Sheet: lake
lat (degN) \ lon (degE)	-178.75	-176.25	-173.75	-171.25	-168.75	-166.25	-163.75	-161.25	-158.75	-156.25	-153.75	-151.25	-148.75	-146.25	-143.75	-141.25	-138.75	-136.25	-133.75	-131.25	-128.75	-126.25	-123.75	-121.25	-118.75	-116.25	-113.75	-111.25	-108.75	-106.25	-103.75	-101.25	-98.75	-96.25	-93.75	-91.25	-88.75	-86.25	-83.75	-81.25	-78.75	-76.25	-73.75	-71.25	-68.75	-66.25	-63.75	-61.25	-58.75
-89	0	0	0	0	0	0	0	0	0	0	0	0	0	0	0	0	0	0	0	0	0	0	0	0	0	0	0	0	0	0	0	0	0	0	0	0	0	0	0	0	0	0	0	0	0	0	0	0	0
-87	0	0	0	0	0	0	0	0	0	0	0	0	0	0	0	0	0	0	0	0	0	0	0	0	0	0	0	0	0	0	0	0	0	0	0	0	0	0	0	0	0	0	0	0	0	0	0	0	0
-85	0	0	0	0	0	0	0	0	0	0	0	0	0	0	0	0	0	0	0	0	0	0	0	0	0	0	0	0	0	0	0	0	0	0	0	0	0	0	0	0	0	0	0	0	0	0	0	0	0
-83	0	0	0	0	0	0	0	0	0	0	0	0	0	0	0	0	0	0	0	0	0	0	0	0	0	0	0	0	0	0	0	0	0	0	0	0	0	0	0	0	0	0	0	0	0	0	0	0	0
-81	0	0	0	0	0	0	0	0	0	0	0	0	0	0	0	0	0	0	0	0	0	0	0	0	0	0	0	0	0	0	0	0	0	0	0	0	0	0	0	0	0	0	0	0	0	0	0	0	0
-79	0	0	0	0	0	0	0	0	0	0	0	0	0	0	0	0	0	0	0	0	0	0	0	0	0	0	0	0	0	0	0	0	0	0	0	0	0	0	0	0	0	0	0	0	0	0	0	0	0
-77	0	0	0	0	0	0	0	0	0	0	0	0	0	0	0	0	0	0	0	0	0	0	0	0	0	0	0	0	0	0	0	0	0	0	0	0	0	0	0	0	0	0	0	0	0	0	0	0	0
-75	0	0	0	0	0	0	0	0	0	0	0	0	0	0	0	0	0	0	0	0	0	0	0	0	0	0	0	0	0	0	0	0	0	0	0	0	0	0	0	0	0	0	0	0	0	0	0	0	0
-73	0	0	0	0	0	0	0	0	0	0	0	0	0	0	0	0	0	0	0	0	0	0	0	0	0	0	0	0	0	0	0	0	0	0	0	0	0	0	0	0	0	0	0	0	0	0	0	0	0
-71	0	0	0	0	0	0	0	0	0	0	0	0	0	0	0	0	0	0	0	0	0	0	0	0	0	0	0	0	0	0	0	0	0	0	0	0	0	0	0	0	0	0	0	0	0	0	0	0	0
-69	0	0	0	0	0	0	0	0	0	0	0	0	0	0	0	0	0	0	0	0	0	0	0	0	0	0	0	0	0	0	0	0	0	0	0	0	0	0	0	0	0	0	0	0	0	0	0	0	0
-67	0	0	0	0	0	0	0	0	0	0	0	0	0	0	0	0	0	0	0	0	0	0	0	0	0	0	0	0	0	0	0	0	0	0	0	0	0	0	0	0	0	0	0	0	0	0	0	0	0
-65	0	0	0	0	0	0	0	0	0	0	0	0	0	0	0	0	0	0	0	0	0	0	0	0	0	0	0	0	0	0	0	0	0	0	0	0	0	0	0	0	0	0	0	0	0	0	0	0	0
-63	0	0	0	0	0	0	0	0	0	0	0	0	0	0	0	0	0	0	0	0	0	0	0	0	0	0	0	0	0	0	0	0	0	0	0	0	0	0	0	0	0	0	0	0	0	0	0	0	0
-61	0	0	0	0	0	0	0	0	0	0	0	0	0	0	0	0	0	0	0	0	0	0	0	0	0	0	0	0	0	0	0	0	0	0	0	0	0	0	0	0	0	0	0	0	0	0	0	0	0
-59	0	0	0	0	0	0	0	0	0	0	0	0	0	0	0	0	0	0	0	0	0	0	0	0	0	0	0	0	0	0	0	0	0	0	0	0	0	0	0	0	0	0	0	0	0	0	0	0	0
-57	0	0	0	0	0	0	0	0	0	0	0	0	0	0	0	0	0	0	0	0	0	0	0	0	0	0	0	0	0	0	0	0	0	0	0	0	0	0	0	0	0	0	0	0	0	0	0	0	0
-55	0	0	0	0	0	0	0	0	0	0	0	0	0	0	0	0	0	0	0	0	0	0	0	0	0	0	0	0	0	0	0	0	0	0	0	0	0	0	0	0	0	0	0	0	0	0	0	0	0
-53	0	0	0	0	0	0	0	0	0	0	0	0	0	0	0	0	0	0	0	0	0	0	0	0	0	0	0	0	0	0	0	0	0	0	0	0	0	0	0	0	0	0	0	761.715	0	0	0	0	0
-51	0	0	0	0	0	0	0	0	0	0	0	0	0	0	0	0	0	0	0	0	0	0	0	0	0	0	0	0	0	0	0	0	0	0	0	0	0	0	0	0	0	0	1044.51	206.641	0	0	0	0	0
-49	0	0	0	0	0	0	0	0	0	0	0	0	0	0	0	0	0	0	0	0	0	0	0	0	0	0	0	0	0	0	0	0	0	0	0	0	0	0	0	0	0	0	946.387	236.788	60.7016	0	0	0	0
-47	0	0	0	0	0	0	0	0	0	0	0	0	0	0	0	0	0	0	0	0	0	0	0	0	0	0	0	0	0	0	0	0	0	0	0	0	0	0	0	0	0	0	732.807	367.902	83.8144	0	0	0	0
-45	0	0	0	0	0	0	0	0	0	0	0	0	0	0	0	0	0	0	0	0	0	0	0	0	0	0	0	0	0	0	0	0	0	0	0	0	0	0	0	0	0	0	958.743	137.8	264.979	0	0	0	0
-43	0	0	0	0	0	0	0	0	0	0	0	0	0	0	0	0	0	0	0	0	0	0	0	0	0	0	0	0	0	0	0	0	0	0	0	0	0	0	0	0	0	0	0	129.704	30.5039	7.68804	0	0	0
-41	0	0	0	0	0	0	0	0	0	0	0	0	0	0	0	0	0	0	0	0	0	0	0	0	0	0	0	0	0	0	0	0	0	0	0	0	0	0	0	0	0	0	0	320.754	76.0284	22.8201	0	0	0
-39	0	0	0	0	0	0	0	0	0	0	0	0	0	0	0	0	0	0	0	0	0	0	0	0	0	0	0	0	0	0	0	0	0	0	0	0	0	0	0	0	0	0	0	136.836	122.016	60.5767	83.6163	0	0
-37	0	0	0	0	0	0	0	0	0	0	0	0	0	0	0	0	0	0	0	0	0	0	0	0	0	0	0	0	0	0	0	0	0	0	0	0	0	0	0	0	0	0	0	83.8356	30.4036	0	37.9794	45.8562	122.317
-35	0	0	0	0	0	0	0	0	0	0	0	0	0	0	0	0	0	0	0	0	0	0	0	0	0	0	0	0	0	0	0	0	0	0	0	0	0	0	0	0	0	0	0	114.25	113.97	0	15.3452	107.043	144.661
-33	0	0	0	0	0	0	0	0	0	0	0	0	0	0	0	0	0	0	0	0	0	0	0	0	0	0	0	0	0	0	0	0	0	0	0	0	0	0	0	0	0	0	0	0	76.6055	15.252	53.3386	190.52	281.513
-31	0	0	0	0	0	0	0	0	0	0	0	0	0	0	0	0	0	0	0	0	0	0	0	0	0	0	0	0	0	0	0	0	0	0	0	0	0	0	0	0	0	0	0	0	22.8379	15.252	268.149	351.115	282.761
-29	0	0	0	0	0	0	0	0	0	0	0	0	0	0	0	0	0	0	0	0	0	0	0	0	0	0	0	0	0	0	0	0	0	0	0	0	0	0	0	0	0	0	0	0	7.66287	76.2598	152.667	221.19	709.769
-27	0	0	0	0	0	0	0	0	0	0	0	0	0	0	0	0	0	0	0	0	0	0	0	0	0	0	0	0	0	0	0	0	0	0	0	0	0	0	0	0	0	0	0	0	61.0756	68.5999	76.3954	99.1716	601.876
-25	0	0	0	0	0	0	0	0	0	0	0	0	0	0	0	0	0	0	0	0	0	0	0	0	0	0	0	0	0	0	0	0	0	0	0	0	0	0	0	0	0	0	0	0	15.252	68.6028	175.677	167.772	343.014
-23	0	0	0	0	0	0	0	0	0	0	0	0	0	0	0	0	0	0	0	0	0	0	0	0	0	0	0	0	0	0	0	0	0	0	0	0	0	0	0	0	0	0	0	0	235.756	106.764	106.538	83.8575	631.515
-21	0	0	0	0	0	0	0	0	0	0	0	0	0	0	0	0	0	0	0	0	0	0	0	0	0	0	0	0	0	0	0	0	0	0	0	0	0	0	0	0	0	0	0	0	7.60043	68.6082	22.8524	38.1043	480.666
-19	0	0	0	0	0	0	0	0	0	0	0	0	0	0	0	0	0	0	0	0	0	0	0	0	0	0	0	0	0	0	0	0	0	0	0	0	0	0	0	0	0	0	0	0	45.7559	435.483	61.0536	183.482	358.077
-17	0	0	0	0	0	0	0	0	0	0	0	0	0	0	0	0	0	0	0	0	0	0	0	0	0	0	0	0	0	0	0	0	0	0	0	0	0	0	0	0	0	0	0	0	488.958	45.7559	183.186	68.6134	633.261
-15	0	0	0	0	0	0	0	0	0	0	0	0	0	0	0	0	0	0	0	0	0	0	0	0	0	0	0	0	0	0	0	0	0	0	0	0	0	0	0	0	0	0	61.0435	152.448	829.573	160.199	282.215	198.275	137.125
-13	0	0	0	0	0	0	0	0	0	0	0	0	0	0	0	0	0	0	0	0	0	0	0	0	0	0	0	0	0	0	0	0	0	0	0	0	0	0	0	0	0	0	122.138	183.146	137.391	404.161	457.804	327.533	83.9011
-11	0	0	0	0	0	0	0	0	0	0	0	0	0	0	0	0	0	0	0	0	0	0	0	0	0	0	0	0	0	0	0	0	0	0	0	0	0	0	0	0	0	99.1506	243.954	114.299	99.073	282.045	106.738	99.1248	152.494
-9	0	0	0	0	0	0	0	0	0	0	0	0	0	0	0	0	0	0	0	0	0	0	0	0	0	0	0	0	0	0	0	0	0	0	0	0	0	0	0	0	0	144.946	236.416	99.1272	198.254	251.71	236.5	152.519	137.31
-7	0	0	0	0	0	0	0	0	0	0	0	0	0	0	0	0	0	0	0	0	0	0	0	0	0	0	0	0	0	0	0	0	0	0	0	0	0	0	0	0	83.8776	183.007	99.0968	106.747	99.1786	175.291	251.633	267.015	167.772
-5	0	0	0	0	0	0	0	0	0	0	0	0	0	0	0	0	0	0	0	0	0	0	0	0	0	0	0	0	0	0	0	0	0	0	0	0	0	0	0	0	114.43	274.605	350.83	122.074	144.934	99.1319	373.69	388.977	312.776
-3	0	0	0	0	0	0	0	0	0	0	0	0	0	0	0	0	0	0	0	0	0	0	0	0	0	0	0	0	0	0	0	0	0	0	0	0	0	0	0	0	259.29	213.52	312.668	312.641	373.62	495.859	541.315	861.627	1097.94
-1	0	0	0	0	0	0	0	0	0	0	0	0	0	0	0	0	0	0	0	0	0	0	0	0	0	0	0	0	0	0	0	0	0	0	0	0	0	0	0	0	411.761	343.184	259.288	190.651	175.378	312.662	716.907	701.555	129.638
1	0	0	0	0	0	0	0	0	0	0	0	0	0	0	0	0	0	0	0	0	0	0	0	0	0	0	0	0	0	0	0	0	0	0	0	0	0	0	0	0	0	137.275	122.025	68.6326	228.784	190.648	68.6373	198.275	61.0055
3	0	0	0	0	0	0	0	0	0	0	0	0	0	0	0	0	0	0	0	0	0	0	0	0	0	0	0	0	0	0	0	0	0	0	0	0	0	0	0	0	0	99.1272	122.037	144.904	236.367	244.017	99.1272	236.374	198.24
5	0	0	0	0	0	0	0	0	0	0	0	0	0	0	0	0	0	0	0	0	0	0	0	0	0	0	0	0	0	0	0	0	0	0	0	0	0	0	0	0	0	129.682	183.047	190.644	205.907	114.407	167.737	106.764	236.399
7	0	0	0	0	0	0	0	0	0	0	0	0	0	0	0	0	0	0	0	0	0	0	0	0	0	0	0	0	0	0	0	0	0	0	0	0	0	0	0	0	0	243.9	221.129	152.519	381.348	411.59	297.389	137.349	0
9	0	0	0	0	0	0	0	0	0	0	0	0	0	0	0	0	0	0	0	0	0	0	0	0	0	0	0	0	0	0	0	0	0	0	0	0	0	0	0	0	0	0	671.065	1515.7	137.289	121.995	236.542	0	0
11	0	0	0	0	0	0	0	0	0	0	0	0	0	0	0	0	0	0	0	0	0	0	0	0	0	0	0	0	0	0	0	0	0	0	0	0	0	0	0	0	0	0	0	0	0	0	0	0	0
13	0	0	0	0	0	0	0	0	0	0	0	0	0	0	0	0	0	0	0	0	0	0	0	0	0	0	0	0	0	0	0	0	0	0	0	0	0	328.363	0	0	0	0	0	0	0	0	0	0	0
15	0	0	0	0	0	0	0	0	0	0	0	0	0	0	0	0	0	0	0	0	0	0	0	0	0	0	0	0	0	0	0	0	0	0	0	122.158	243.782	266.927	0	0	0	0	0	0	0	0	0	0	0
17	0	0	0	0	0	0	0	0	0	0	0	0	0	0	0	0	0	0	0	0	0	0	0	0	0	0	0	0	0	0	0	0	0	235.978	197.869	266.808	0	0	0	0	0	0	0	0	0	0	0	0	0
19	0	0	0	0	0	0	0	0	0	0	0	0	0	0	0	0	0	0	0	0	0	0	0	0	0	0	0	0	0	0	0	152.382	106.764	0	0	0	114.458	0	0	0	0	0	0	160.398	0	0	0	0	0
21	0	0	0	0	0	0	0	0	0	0	0	0	0	0	0	0	0	0	0	0	0	0	0	0	0	0	0	0	0	0	236.993	167.976	38.1043	0	0	0	0	0	0	0	0	0	0	0	0	0	0	0	0
23	0	0	0	0	0	0	0	0	0	0	0	0	0	0	0	0	0	0	0	0	0	0	0	0	0	0	0	0	0	0	30.5039	7.59773	91.6247	0	0	0	0	0	0	0	0	0	0	0	0	0	0	0	0
25	0	0	0	0	0	0	0	0	0	0	0	0	0	0	0	0	0	0	0	0	0	0	0	0	0	0	0	0	0	15.252	0	0	38.0988	0	0	0	0	0	0	0	0	0	0	0	0	0	0	0	0
27	0	0	0	0	0	0	0	0	0	0	0	0	0	0	0	0	0	0	0	0	0	0	0	0	0	0	0	0	68.5321	15.1841	0	7.59207	45.8237	0	0	0	0	0	0	381.231	0	0	0	0	0	0	0	0	0
29	0	0	0	0	0	0	0	0	0	0	0	0	0	0	0	0	0	0	0	0	0	0	0	0	0	0	0	0	7.66287	15.252	0	15.1782	15.3257	0	0	0	0	0	0	0	0	0	0	0	0	0	0	0	0
31	0	0	0	0	0	0	0	0	0	0	0	0	0	0	0	0	0	0	0	0	0	0	0	0	0	0	0	61.0878	22.9179	0	22.758	7.58599	68.6738	45.5959	243.951	442.866	83.8458	144.934	298.733	0	0	0	0	0	0	0	0	0	0
33	0	0	0	0	0	0	0	0	0	0	0	0	0	0	0	0	0	0	0	0	0	0	0	0	0	228.174	83.929	60.6621	0	45.583	7.6692	0	61.0078	175.181	243.772	137.268	53.3386	114.519	22.7483	251.528	0	0	0	0	0	0	0	0	0
35	0	0	0	0	0	0	0	0	0	0	0	0	0	0	0	0	0	0	0	0	0	0	0	0	61.101	7.67258	76.1666	30.6903	7.67258	22.9245	45.5695	45.4763	22.9245	144.474	144.567	214.18	99.0911	199.114	175.165	198.182	45.7559	0	0	0	0	0	0	0	0
37	0	0	0	0	0	0	0	0	0	0	0	0	0	0	0	0	0	0	0	0	0	0	0	0	174.946	0	153.422	121.414	60.7069	91.3111	76.2598	30.5039	107.466	84.2368	99.6894	38.2803	243.831	114.54	68.9848	30.6042	175.849	0	0	0	0	0	0	0	0
39	0	0	0	0	0	0	0	0	0	0	0	0	0	0	0	0	0	0	0	0	0	0	0	290.218	167.772	0	0	53.4357	122.123	99.2994	76.5831	45.8636	30.6117	60.7923	144.732	206.386	15.252	61.3312	68.9032	68.4721	22.824	358.367	0	0	0	0	0	0	0
41	0	0	0	0	0	0	0	0	0	0	0	0	0	0	0	0	0	0	0	0	0	0	0	236	61.3549	7.56813	265.231	282.682	45.7559	53.4397	45.7559	60.6607	45.7559	45.6401	7.56813	106.879	98.7327	484.476	651.206	1113.09	15.3677	137.152	0	0	0	0	0	0	0
43	0	0	0	0	0	0	0	0	0	0	0	0	0	0	0	0	0	0	0	0	0	0	0	145.576	91.1394	75.8874	84.196	68.6958	53.3198	46.1282	15.3761	38.3161	144.459	83.6996	37.8196	121.767	1112.77	3608.39	692.412	3019.52	2644.41	1477.57	395.558	0	0	0	0	0	0
45	0	0	0	0	0	0	0	0	0	0	0	0	0	0	0	0	0	0	0	0	0	0	0	75.8605	45.7559	61.5402	0	123.08	7.69253	15.252	23.0776	296.415	144.561	357.156	480.104	167.372	497.352	4925.56	4175.55	5111.51	747.745	863.532	702.122	412.335	685.406	0	0	0	0
47	0	0	0	0	0	0	0	0	0	0	0	0	0	0	0	0	0	0	0	0	0	0	0	91.2262	235.049	37.773	90.6553	38.4867	68.2769	265.981	129.142	478.51	252.014	488.634	1058.94	2165.62	3893.2	5347.85	1484.15	870.646	907.42	1149.45	975.126	396.265	389.995	212.956	0	0	0
49	0	0	0	0	0	0	0	0	0	0	0	0	0	0	0	0	0	0	0	0	0	0	189.348	266.22	221.077	251.428	198.735	137.268	145.276	122.322	376.659	244.95	61.314	365.434	2393.07	2420.57	2839.27	1967.26	390.533	381.605	712.355	1041.62	1065.95	1275.61	470.667	0	0	0	0
51	0	0	0	0	0	0	0	0	0	0	0	0	0	0	0	0	0	0	0	0	0	459.531	267.32	258.954	397.208	198.604	137.432	183.845	129.395	159.57	377.683	632.052	1818.91	1897.63	1570.79	1564.89	1041.24	542.02	227.958	251.246	314.72	1107.16	1470.58	800.317	951.521	549.399	573.51	689.625	0
53	0	0	0	0	0	0	0	0	0	0	0	0	0	0	0	0	0	0	0	0	0	524.868	113.595	275.772	191.091	205.636	426.878	357.803	350.972	432.12	471.397	1779.89	4525.06	1643.74	1880.88	1553.58	1854.61	953.689	478.935	0	0	859.704	1661.99	1735.9	1096.2	1177.93	1070.46	863.59	925.953
55	0	0	0	0	0	0	0	0	0	0	0	0	0	0	0	0	0	0	0	0	213.337	321.241	299.789	183.214	212.767	484.451	562.611	720.073	821.895	1597.84	1883.64	2174.26	1345.78	2221.53	1787.71	990.119	766.019	928.731	0	0	0	1047.7	1498.23	1784.29	999.858	1449.89	1467.23	611.599	0
57	0	0	0	0	0	0	0	0	0	0	0	0	0	0	0	0	0	0	470.001	436.833	144.996	152.519	137.882	145.406	107.174	305.244	321.316	388.617	941.377	1071.47	1335.67	1711.44	1172.76	748.575	382.938	0	0	0	0	0	0	0	2253.45	1258.18	1066.41	1256.13	804.519	0	0
59	0	0	0	0	0	0	0	0	0	1318.3	0	0	0	0	0	0	0	289.123	386.156	227.893	250.217	212.42	327.142	416.66	415.552	389.036	440.978	1646.12	1846.99	1015.46	1490.06	1229.22	1347.25	926.603	0	0	0	0	0	0	0	2248.45	2071.61	1385.93	0	0	0	0	0
61	0	0	0	0	0	0	1387.38	751.73	206.742	152.279	245.952	0	372.592	0	234.845	60.0473	203.86	312.785	268.71	198.516	252.978	153	252.498	391.446	573.989	2024.97	2928.93	1247.78	1155.55	1541.17	1964.32	1562.18	1786.64	1490.61	0	0	0	0	0	0	0	1427.8	1038.51	0	0	0	0	0	0
63	0	0	0	0	0	0	0	0	304.255	145.285	174.744	190.78	191.564	352.885	213.266	107.025	213.266	298.327	198.537	161.06	83.7551	135.961	358.551	531.729	1021.28	1075.39	1336.59	1903.26	1303.65	1338.86	1111.64	2219.81	2053.87	1614.88	1721.38	0	0	0	0	0	0	0	0	0	0	0	0	0	0
65	0	0	0	0	0	0	0	0	207.186	393.411	212.957	205.759	259.569	145.322	211.244	160.859	107.049	106.478	113.962	152.234	271.11	453.848	816.47	3197.23	1759.87	1060.09	879.414	1454.99	1748.43	1137.84	832.801	1214.73	1653.78	1588.42	1214.04	1080.54	900.151	0	0	0	0	0	0	1904.78	971.843	0	0	0	0
67	168.085	136.327	0	0	0	0	0	843.304	430.504	282.004	159.989	215.409	374.143	533.561	447.324	241.836	256.147	196.08	625.587	552.777	399.059	1283.62	2027.62	3182.98	2059.87	600.47	1157.95	638.701	717.783	814.255	973.359	837.346	891.769	759.832	793.415	619.742	792.217	761.343	981.086	0	0	0	0	2275.48	1187.26	391.904	0	0	0
69	0	0	0	0	0	0	0	144.027	114.563	212.14	324.276	287.36	321.331	239.353	231.207	317.693	0	0	1184.28	1194.67	271.937	480.439	538.15	215.608	0	0	0	0	0	551.322	0	0	0	0	874.558	0	0	0	484.424	0	0	0	541.271	528.793	969.19	0	0	0	0
71	0	0	0	0	0	0	0	0	0	0	0	0	0	0	0	0	0	0	0	0	0	0	0	0	0	1099.86	557.364	566.255	665.973	888.18	0	0	0	0	0	0	0	950.823	512.768	672.158	892.344	374.253	651.968	0	0	0	0	0	0
73	0	0	0	0	0	0	0	0	0	0	0	0	0	0	0	0	0	0	0	0	0	0	0	543.839	871.959	0	0	0	0	0	0	0	724.243	0	0	0	0	0	0	0	2494.28	0	0	0	0	0	0	0	0
75	0	0	0	0	0	0	0	0	0	0	0	0	0	0	0	0	0	0	0	0	0	0	0	0	0	0	0	0	0	0	0	0	0	0	0	0	0	0	0	0	0	0	0	0	0	0	0	0	0
77	0	0	0	0	0	0	0	0	0	0	0	0	0	0	0	0	0	0	0	0	0	0	0	0	0	0	0	0	0	0	0	0	0	0	0	0	0	0	0	0	0	0	0	0	0	0	0	0	0
79	0	0	0	0	0	0	0	0	0	0	0	0	0	0	0	0	0	0	0	0	0	0	0	0	0	0	0	0	0	0	0	0	0	0	0	0	0	0	0	0	0	0	0	0	0	0	0	0	0
81	0	0	0	0	0	0	0	0	0	0	0	0	0	0	0	0	0	0	0	0	0	0	0	0	0	0	0	0	0	0	0	0	0	0	0	0	0	0	0	0	0	0	0	0	0	0	0	0	0
83	0	0	0	0	0	0	0	0	0	0	0	0	0	0	0	0	0	0	0	0	0	0	0	0	0	0	0	0	0	0	0	0	0	0	0	0	0	0	0	0	0	0	0	0	0	0	0	0	0
85	0	0	0	0	0	0	0	0	0	0	0	0	0	0	0	0	0	0	0	0	0	0	0	0	0	0	0	0	0	0	0	0	0	0	0	0	0	0	0	0	0	0	0	0	0	0	0	0	0
87	0	0	0	0	0	0	0	0	0	0	0	0	0	0	0	0	0	0	0	0	0	0	0	0	0	0	0	0	0	0	0	0	0	0	0	0	0	0	0	0	0	0	0	0	0	0	0	0	0
89	0	0	0	0	0	0	0	0	0	0	0	0	0	0	0	0	0	0	0	0	0	0	0	0	0	0	0	0	0	0	0	0	0	0	0	0	0	0	0	0	0	0	0	0	0	0	0	0	0
[truncated: 95 more columns]

## Sheet: ocean
lat (degN) \ lon (degE)	-178.75	-176.25	-173.75	-171.25	-168.75	-166.25	-163.75	-161.25	-158.75	-156.25	-153.75	-151.25	-148.75	-146.25	-143.75	-141.25	-138.75	-136.25	-133.75	-131.25	-128.75	-126.25	-123.75	-121.25	-118.75	-116.25	-113.75	-111.25	-108.75	-106.25	-103.75	-101.25	-98.75	-96.25	-93.75	-91.25	-88.75	-86.25	-83.75	-81.25	-78.75	-76.25	-73.75	-71.25	-68.75	-66.25	-63.75	-61.25	-58.75
-89	0	0	0	0	0	0	0	0	0	0	0	0	0	0	0	0	0	0	0	0	0	0	0	0	0	0	0	0	0	0	0	0	0	0	0	0	0	0	0	0	0	0	0	0	0	0	0	0	0
-87	0	0	0	0	0	0	0	0	0	0	0	0	0	0	0	0	0	0	0	0	0	0	0	0	0	0	0	0	0	0	0	0	0	0	0	0	0	0	0	0	0	0	0	0	0	0	0	0	0
-85	0	0	0	0	0	0	0	0	0	0	0	0	0	0	0	0	0	0	0	0	0	0	0	0	0	0	0	0	0	0	0	0	0	0	0	0	0	0	0	0	0	0	0	0	0	0	0	0	0
-83	0	0	0	0	0	0	0	0	0	0	0	0	0	0	0	0	0	0	0	0	0	0	0	0	0	0	0	0	0	0	0	0	0	0	0	0	0	0	0	0	0	0	0	0	0	0	0	0	0
-81	0	0	0	0	0	0	0	0	0	0	0	0	0	0	0	0	0	0	0	0	0	0	0	0	0	0	0	0	0	0	0	0	0	0	0	0	0	0	0	0	0	0	0	0	0	0	0	0	0
-79	0	0	0	0	0	0	0	0	0	0	0	0	0	0	0	0	0	0	0	0	0	0	0	0	0	0	0	0	0	0	0	0	0	0	0	0	0	0	0	0	0	0	0	0	0	0	0	0	0
-77	43.9	43.9	43.9	43.9	43.9	43.9	43.9	43.9	33.3399	22.7797	22.7797	22.7797	0	0	0	0	0	0	0	0	0	0	0	0	0	0	0	0	0	0	0	0	0	0	0	0	0	0	0	0	0	0	0	0	0	0	0	0	0
-75	43.9	43.9	43.9	43.9	43.9	43.9	43.9	43.9	43.9	43.9	43.9	43.9	43.9	33.2824	22.6649	22.6649	22.6649	22.6649	11.3324	0	0	0	0	0	0	0	0	0	22.6649	22.6649	22.6649	0	0	0	0	0	0	0	0	0	0	0	0	0	0	0	0	0	22.6649
-73	43.9	43.9	43.9	43.9	43.9	43.9	43.9	43.9	43.9	43.9	43.9	43.9	43.9	43.9	43.9	43.9	43.9	43.9	43.9	43.9	43.9	22.5766	43.9	43.9	43.9	43.9	43.9	43.9	43.9	43.9	21.95	0	0	0	22.5766	22.5766	22.5766	22.5766	22.5766	33.2383	11.2883	0	0	0	0	0	0	0	43.9
-71	43.9	43.9	43.9	43.9	43.9	43.9	43.9	43.9	43.9	43.9	43.9	43.9	43.9	43.9	43.9	43.9	43.9	43.9	43.9	43.9	43.9	43.9	43.9	43.9	43.9	43.9	43.9	43.9	43.9	43.9	43.9	43.9	43.9	43.9	43.9	43.9	43.9	43.9	43.9	43.9	43.9	21.95	0	0	0	0	0	0	43.9
-69	43.9	43.9	43.9	43.9	43.9	43.9	43.9	43.9	43.9	43.9	43.9	43.9	43.9	43.9	43.9	43.9	43.9	43.9	43.9	43.9	43.9	43.9	43.9	43.9	43.9	43.9	43.9	43.9	43.9	43.9	43.9	43.9	43.9	43.9	43.9	43.9	43.9	43.9	43.9	43.9	43.9	43.9	43.9	22.449	33.1745	0	0	21.95	43.9
-67	43.9	43.9	43.9	43.9	43.9	43.9	43.9	43.9	43.9	43.9	43.9	43.9	43.9	43.9	43.9	43.9	43.9	43.9	43.9	43.9	43.9	43.9	43.9	43.9	43.9	43.9	43.9	43.9	43.9	43.9	43.9	43.9	43.9	43.9	43.9	43.9	43.9	43.9	43.9	43.9	43.9	43.9	43.9	43.9	33.1506	11.2006	0	10.7494	43.9
-65	43.9	43.9	43.9	43.9	43.9	43.9	43.9	43.9	43.9	43.9	43.9	43.9	43.9	43.9	43.9	43.9	43.9	43.9	43.9	43.9	43.9	43.9	43.9	43.9	43.9	43.9	43.9	43.9	43.9	43.9	43.9	43.9	43.9	43.9	43.9	43.9	43.9	43.9	43.9	43.9	43.9	43.9	43.9	43.9	43.9	43.9	22.3608	0	32.7196
-63	43.9	43.9	43.9	43.9	43.9	43.9	43.9	43.9	43.9	43.9	43.9	43.9	43.9	43.9	43.9	43.9	43.9	43.9	43.9	43.9	43.9	43.9	43.9	43.9	43.9	43.9	43.9	43.9	43.9	43.9	43.9	43.9	43.9	43.9	43.9	43.9	43.9	43.9	43.9	43.9	43.9	43.9	43.9	43.9	43.9	43.9	43.9	43.9	33.113
-61	43.9	43.9	43.9	43.9	43.9	43.9	43.9	43.9	43.9	43.9	43.9	43.9	43.9	43.9	43.9	43.9	43.9	43.9	43.9	43.9	43.9	43.9	43.9	43.9	43.9	43.9	43.9	43.9	43.9	43.9	43.9	43.9	43.9	43.9	43.9	43.9	43.9	43.9	43.9	43.9	43.9	43.9	43.9	43.9	43.9	43.9	43.9	43.9	43.9
-59	43.9	43.9	43.9	43.9	43.9	43.9	43.9	43.9	43.9	43.9	43.9	43.9	43.9	43.9	43.9	43.9	43.9	43.9	43.9	43.9	43.9	43.9	43.9	43.9	43.9	43.9	43.9	43.9	43.9	43.9	43.9	43.9	43.9	43.9	43.9	43.9	43.9	43.9	43.9	43.9	43.9	43.9	43.9	43.9	43.9	43.9	43.9	43.9	43.9
-57	43.9	43.9	43.9	43.9	43.9	43.9	43.9	43.9	43.9	43.9	43.9	43.9	43.9	43.9	43.9	43.9	43.9	43.9	43.9	43.9	43.9	43.9	43.9	43.9	43.9	43.9	43.9	43.9	43.9	43.9	43.9	43.9	43.9	43.9	43.9	43.9	43.9	43.9	43.9	43.9	43.9	43.9	43.9	43.9	43.9	43.9	43.9	43.9	43.9
-55	43.9	43.9	43.9	43.9	43.9	43.9	43.9	43.9	43.9	43.9	43.9	43.9	43.9	43.9	43.9	43.9	43.9	43.9	43.9	43.9	43.9	43.9	43.9	43.9	43.9	43.9	43.9	43.9	43.9	43.9	43.9	43.9	43.9	43.9	43.9	43.9	43.9	43.9	43.9	43.9	43.9	43.9	43.9	21.6764	10.8382	32.7882	43.9	43.9	43.9
-53	43.9	43.9	43.9	43.9	43.9	43.9	43.9	43.9	43.9	43.9	43.9	43.9	43.9	43.9	43.9	43.9	43.9	43.9	43.9	43.9	43.9	43.9	43.9	43.9	43.9	43.9	43.9	43.9	43.9	43.9	43.9	43.9	43.9	43.9	43.9	43.9	43.9	43.9	43.9	43.9	43.9	43.9	10.8479	0	11.1021	43.9	43.9	43.9	43.9
-51	43.9	43.9	43.9	43.9	43.9	43.9	43.9	43.9	43.9	43.9	43.9	43.9	43.9	43.9	43.9	43.9	43.9	43.9	43.9	43.9	43.9	43.9	43.9	43.9	43.9	43.9	43.9	43.9	43.9	43.9	43.9	43.9	43.9	43.9	43.9	43.9	43.9	43.9	43.9	43.9	43.9	43.9	0	0	21.95	43.9	43.9	43.9	33.0433
-49	43.9	43.9	43.9	43.9	43.9	43.9	43.9	43.9	43.9	43.9	43.9	43.9	43.9	43.9	43.9	43.9	43.9	43.9	43.9	43.9	43.9	43.9	43.9	43.9	43.9	43.9	43.9	43.9	43.9	43.9	43.9	43.9	43.9	43.9	43.9	43.9	43.9	43.9	43.9	43.9	43.9	32.8148	0	0	0	32.8148	43.9	43.9	43.9
-47	43.9	43.9	43.9	43.9	43.9	43.9	43.9	43.9	43.9	43.9	43.9	43.9	43.9	43.9	43.9	43.9	43.9	43.9	43.9	43.9	43.9	43.9	43.9	43.9	43.9	43.9	43.9	43.9	43.9	43.9	43.9	43.9	43.9	43.9	43.9	43.9	43.9	43.9	43.9	43.9	43.9	43.9	0	0	0	33.0277	43.9	43.9	43.9
-45	43.9	43.9	43.9	43.9	43.9	43.9	43.9	43.9	43.9	43.9	43.9	43.9	43.9	43.9	43.9	43.9	43.9	43.9	43.9	43.9	43.9	43.9	43.9	43.9	43.9	43.9	43.9	43.9	43.9	43.9	43.9	43.9	43.9	43.9	43.9	43.9	43.9	43.9	43.9	43.9	43.9	43.9	0	0	0	21.7584	43.9	43.9	43.9
-43	43.9	43.9	43.9	43.9	43.9	43.9	43.9	43.9	43.9	43.9	43.9	43.9	43.9	43.9	43.9	43.9	43.9	43.9	43.9	43.9	43.9	43.9	43.9	43.9	43.9	43.9	43.9	43.9	43.9	43.9	43.9	43.9	43.9	43.9	43.9	43.9	43.9	43.9	43.9	43.9	43.9	43.9	32.8357	0	0	0	43.9	43.9	43.9
-41	43.9	43.9	43.9	43.9	43.9	43.9	43.9	43.9	43.9	43.9	43.9	43.9	43.9	43.9	43.9	43.9	43.9	43.9	43.9	43.9	43.9	43.9	43.9	43.9	43.9	43.9	43.9	43.9	43.9	43.9	43.9	43.9	43.9	43.9	43.9	43.9	43.9	43.9	43.9	43.9	43.9	43.9	21.95	0	0	0	21.7835	43.9	43.9
-39	43.9	43.9	43.9	43.9	43.9	43.9	43.9	43.9	43.9	43.9	43.9	43.9	43.9	43.9	43.9	43.9	43.9	43.9	43.9	43.9	43.9	43.9	43.9	43.9	43.9	43.9	43.9	43.9	43.9	43.9	43.9	43.9	43.9	43.9	43.9	43.9	43.9	43.9	43.9	43.9	43.9	43.9	21.95	0	0	0	0	21.7949	32.8474
-37	43.9	43.9	43.9	43.9	43.9	43.9	43.9	43.9	43.9	43.9	43.9	43.9	43.9	43.9	43.9	43.9	43.9	43.9	43.9	43.9	43.9	43.9	43.9	43.9	43.9	43.9	43.9	43.9	43.9	43.9	43.9	43.9	43.9	43.9	43.9	43.9	43.9	43.9	43.9	43.9	43.9	43.9	32.9972	0	0	0	0	0	0
-35	43.9	43.9	43.9	43.9	43.9	43.9	43.9	43.9	43.9	43.9	43.9	43.9	43.9	43.9	43.9	43.9	43.9	43.9	43.9	43.9	43.9	43.9	43.9	43.9	43.9	43.9	43.9	43.9	43.9	43.9	43.9	43.9	43.9	43.9	43.9	43.9	43.9	43.9	43.9	43.9	43.9	43.9	43.9	0	0	0	0	0	0
-33	43.9	43.9	43.9	43.9	43.9	43.9	43.9	43.9	43.9	43.9	43.9	43.9	43.9	43.9	43.9	43.9	43.9	43.9	43.9	43.9	43.9	43.9	43.9	43.9	43.9	43.9	43.9	43.9	43.9	43.9	43.9	43.9	43.9	43.9	43.9	43.9	43.9	43.9	43.9	43.9	43.9	43.9	43.9	21.95	0	0	0	0	0
-31	43.9	43.9	43.9	43.9	43.9	43.9	43.9	43.9	43.9	43.9	43.9	43.9	43.9	43.9	43.9	43.9	43.9	43.9	43.9	43.9	43.9	43.9	43.9	43.9	43.9	43.9	43.9	43.9	43.9	43.9	43.9	43.9	43.9	43.9	43.9	43.9	43.9	43.9	43.9	43.9	43.9	43.9	43.9	21.95	0	0	0	0	0
-29	43.9	43.9	43.9	43.9	43.9	43.9	43.9	43.9	43.9	43.9	43.9	43.9	43.9	43.9	43.9	43.9	43.9	43.9	43.9	43.9	43.9	43.9	43.9	43.9	43.9	43.9	43.9	43.9	43.9	43.9	43.9	43.9	43.9	43.9	43.9	43.9	43.9	43.9	43.9	43.9	43.9	43.9	43.9	21.95	0	0	0	0	0
-27	43.9	43.9	43.9	43.9	43.9	43.9	43.9	43.9	43.9	43.9	43.9	43.9	43.9	43.9	43.9	43.9	43.9	43.9	43.9	43.9	43.9	43.9	43.9	43.9	43.9	43.9	43.9	43.9	43.9	43.9	43.9	43.9	43.9	43.9	43.9	43.9	43.9	43.9	43.9	43.9	43.9	43.9	43.9	21.95	0	0	0	0	0
-25	43.9	43.9	43.9	43.9	43.9	43.9	43.9	43.9	43.9	43.9	43.9	43.9	43.9	43.9	43.9	43.9	43.9	43.9	43.9	43.9	43.9	43.9	43.9	43.9	43.9	43.9	43.9	43.9	43.9	43.9	43.9	43.9	43.9	43.9	43.9	43.9	43.9	43.9	43.9	43.9	43.9	43.9	43.9	43.9	0	0	0	0	0
-23	43.9	43.9	43.9	43.9	43.9	43.9	43.9	43.9	43.9	43.9	43.9	43.9	43.9	43.9	43.9	43.9	43.9	43.9	43.9	43.9	43.9	43.9	43.9	43.9	43.9	43.9	43.9	43.9	43.9	43.9	43.9	43.9	43.9	43.9	43.9	43.9	43.9	43.9	43.9	43.9	43.9	43.9	43.9	43.9	0	0	0	0	0
-21	43.9	43.9	43.9	43.9	43.9	43.9	43.9	43.9	43.9	43.9	43.9	43.9	43.9	43.9	43.9	43.9	43.9	43.9	43.9	43.9	43.9	43.9	43.9	43.9	43.9	43.9	43.9	43.9	43.9	43.9	43.9	43.9	43.9	43.9	43.9	43.9	43.9	43.9	43.9	43.9	43.9	43.9	43.9	43.9	0	0	0	0	0
-19	43.9	43.9	43.9	43.9	43.9	43.9	43.9	43.9	43.9	43.9	43.9	43.9	43.9	43.9	43.9	43.9	43.9	43.9	43.9	43.9	43.9	43.9	43.9	43.9	43.9	43.9	43.9	43.9	43.9	43.9	43.9	43.9	43.9	43.9	43.9	43.9	43.9	43.9	43.9	43.9	43.9	43.9	43.9	43.9	0	0	0	0	0
-17	43.9	43.9	43.9	43.9	43.9	43.9	43.9	43.9	43.9	43.9	43.9	43.9	43.9	43.9	43.9	43.9	43.9	43.9	43.9	43.9	43.9	43.9	43.9	43.9	43.9	43.9	43.9	43.9	43.9	43.9	43.9	43.9	43.9	43.9	43.9	43.9	43.9	43.9	43.9	43.9	43.9	43.9	43.9	10.9457	0	0	0	0	0
-15	43.9	43.9	43.9	43.9	43.9	43.9	43.9	43.9	43.9	43.9	43.9	43.9	43.9	43.9	43.9	43.9	43.9	43.9	43.9	43.9	43.9	43.9	43.9	43.9	43.9	43.9	43.9	43.9	43.9	43.9	43.9	43.9	43.9	43.9	43.9	43.9	43.9	43.9	43.9	43.9	43.9	32.8993	0	0	0	0	0	0	0
-13	43.9	43.9	43.9	43.9	43.9	43.9	43.9	43.9	43.9	43.9	43.9	43.9	43.9	43.9	43.9	43.9	43.9	43.9	43.9	43.9	43.9	43.9	43.9	43.9	43.9	43.9	43.9	43.9	43.9	43.9	43.9	43.9	43.9	43.9	43.9	43.9	43.9	43.9	43.9	43.9	43.9	21.95	0	0	0	0	0	0	0
-11	43.9	43.9	43.9	43.9	43.9	43.9	43.9	43.9	43.9	43.9	43.9	43.9	43.9	43.9	43.9	43.9	43.9	43.9	43.9	43.9	43.9	43.9	43.9	43.9	43.9	43.9	43.9	43.9	43.9	43.9	43.9	43.9	43.9	43.9	43.9	43.9	43.9	43.9	43.9	43.9	43.9	0	0	0	0	0	0	0	0
-9	43.9	43.9	43.9	43.9	43.9	43.9	43.9	43.9	43.9	43.9	43.9	43.9	43.9	43.9	43.9	43.9	43.9	43.9	43.9	43.9	43.9	43.9	43.9	43.9	43.9	43.9	43.9	43.9	43.9	43.9	43.9	43.9	43.9	43.9	43.9	43.9	43.9	43.9	43.9	43.9	21.95	0	0	0	0	0	0	0	0
-7	43.9	43.9	43.9	43.9	43.9	43.9	43.9	43.9	43.9	43.9	43.9	43.9	43.9	43.9	43.9	43.9	43.9	43.9	43.9	43.9	43.9	43.9	43.9	43.9	43.9	43.9	43.9	43.9	43.9	43.9	43.9	43.9	43.9	43.9	43.9	43.9	43.9	43.9	43.9	43.9	0	0	0	0	0	0	0	0	0
-5	43.9	43.9	43.9	43.9	43.9	43.9	43.9	43.9	43.9	43.9	43.9	43.9	43.9	43.9	43.9	43.9	43.9	43.9	43.9	43.9	43.9	43.9	43.9	43.9	43.9	43.9	43.9	43.9	43.9	43.9	43.9	43.9	43.9	43.9	43.9	43.9	43.9	43.9	43.9	21.95	0	0	0	0	0	0	0	0	0
-3	43.9	43.9	43.9	43.9	43.9	43.9	43.9	43.9	43.9	43.9	43.9	43.9	43.9	43.9	43.9	43.9	43.9	43.9	43.9	43.9	43.9	43.9	43.9	43.9	43.9	43.9	43.9	43.9	43.9	43.9	43.9	43.9	43.9	43.9	43.9	43.9	43.9	43.9	43.9	43.9	0	0	0	0	0	0	0	0	0
-1	43.9	43.9	43.9	43.9	43.9	43.9	43.9	43.9	43.9	43.9	43.9	43.9	43.9	43.9	43.9	43.9	43.9	43.9	43.9	43.9	43.9	43.9	43.9	43.9	43.9	43.9	43.9	43.9	43.9	43.9	43.9	43.9	43.9	43.9	43.9	43.9	43.9	43.9	43.9	32.9267	0	0	0	0	0	0	0	0	0
1	43.9	43.9	43.9	43.9	43.9	43.9	43.9	43.9	43.9	43.9	43.9	43.9	43.9	43.9	43.9	43.9	43.9	43.9	43.9	43.9	43.9	43.9	43.9	43.9	43.9	43.9	43.9	43.9	43.9	43.9	43.9	43.9	43.9	43.9	43.9	43.9	43.9	43.9	43.9	43.9	10.9733	0	0	0	0	0	0	0	0
3	43.9	43.9	43.9	43.9	43.9	43.9	43.9	43.9	43.9	43.9	43.9	43.9	43.9	43.9	43.9	43.9	43.9	43.9	43.9	43.9	43.9	43.9	43.9	43.9	43.9	43.9	43.9	43.9	43.9	43.9	43.9	43.9	43.9	43.9	43.9	43.9	43.9	43.9	43.9	43.9	32.92	0	0	0	0	0	0	0	0
5	43.9	43.9	43.9	43.9	43.9	43.9	43.9	43.9	43.9	43.9	43.9	43.9	43.9	43.9	43.9	43.9	43.9	43.9	43.9	43.9	43.9	43.9	43.9	43.9	43.9	43.9	43.9	43.9	43.9	43.9	43.9	43.9	43.9	43.9	43.9	43.9	43.9	43.9	43.9	43.9	43.9	0	0	0	0	0	0	0	0
7	43.9	43.9	43.9	43.9	43.9	43.9	43.9	43.9	43.9	43.9	43.9	43.9	43.9	43.9	43.9	43.9	43.9	43.9	43.9	43.9	43.9	43.9	43.9	43.9	43.9	43.9	43.9	43.9	43.9	43.9	43.9	43.9	43.9	43.9	43.9	43.9	43.9	43.9	43.9	32.9368	43.9	0	0	0	0	0	0	0	10.9632
9	43.9	43.9	43.9	43.9	43.9	43.9	43.9	43.9	43.9	43.9	43.9	43.9	43.9	43.9	43.9	43.9	43.9	43.9	43.9	43.9	43.9	43.9	43.9	43.9	43.9	43.9	43.9	43.9	43.9	43.9	43.9	43.9	43.9	43.9	43.9	43.9	43.9	43.9	21.95	21.9197	21.95	10.9598	0	0	0	0	0	10.9598	43.9
11	43.9	43.9	43.9	43.9	43.9	43.9	43.9	43.9	43.9	43.9	43.9	43.9	43.9	43.9	43.9	43.9	43.9	43.9	43.9	43.9	43.9	43.9	43.9	43.9	43.9	43.9	43.9	43.9	43.9	43.9	43.9	43.9	43.9	43.9	43.9	43.9	43.9	21.95	21.95	43.9	43.9	43.9	21.9128	10.9564	10.9564	32.9064	32.9064	43.9	43.9
13	43.9	43.9	43.9	43.9	43.9	43.9	43.9	43.9	43.9	43.9	43.9	43.9	43.9	43.9	43.9	43.9	43.9	43.9	43.9	43.9	43.9	43.9	43.9	43.9	43.9	43.9	43.9	43.9	43.9	43.9	43.9	43.9	43.9	43.9	43.9	43.9	21.9942	0	21.95	43.9	43.9	43.9	43.9	43.9	43.9	43.9	43.9	43.9	43.9
15	43.9	43.9	43.9	43.9	43.9	43.9	43.9	43.9	43.9	43.9	43.9	43.9	43.9	43.9	43.9	43.9	43.9	43.9	43.9	43.9	43.9	43.9	43.9	43.9	43.9	43.9	43.9	43.9	43.9	43.9	43.9	43.9	43.9	43.9	32.9507	0	0	0	21.95	43.9	43.9	43.9	43.9	43.9	43.9	43.9	43.9	43.9	43.9
17	43.9	43.9	43.9	43.9	43.9	43.9	43.9	43.9	43.9	43.9	43.9	43.9	43.9	43.9	43.9	43.9	43.9	43.9	43.9	43.9	43.9	43.9	43.9	43.9	43.9	43.9	43.9	43.9	43.9	43.9	43.9	32.9543	11.0043	0	0	0	21.95	43.9	43.9	43.9	43.9	43.9	43.9	43.9	43.9	43.9	43.9	43.9	43.9
19	43.9	43.9	43.9	43.9	43.9	43.9	43.9	43.9	43.9	32.958	43.9	43.9	43.9	43.9	43.9	43.9	43.9	43.9	43.9	43.9	43.9	43.9	43.9	43.9	43.9	43.9	43.9	43.9	43.9	43.9	11.008	0	0	10.942	43.9	10.942	0	43.9	43.9	43.9	43.9	43.9	43.9	0	32.892	43.9	43.9	43.9	43.9
21	43.9	43.9	43.9	43.9	43.9	43.9	43.9	43.9	43.9	43.9	43.9	43.9	43.9	43.9	43.9	43.9	43.9	43.9	43.9	43.9	43.9	43.9	43.9	43.9	43.9	43.9	43.9	43.9	43.9	43.9	0	0	0	43.9	43.9	43.9	10.9382	43.9	43.9	43.9	32.9618	21.8765	43.9	43.9	43.9	43.9	43.9	43.9	43.9
23	43.9	43.9	43.9	43.9	43.9	43.9	43.9	43.9	43.9	43.9	43.9	43.9	43.9	43.9	43.9	43.9	43.9	43.9	43.9	43.9	43.9	43.9	43.9	43.9	43.9	43.9	43.9	43.9	43.9	21.95	0	0	0	43.9	43.9	43.9	43.9	43.9	32.8843	21.8687	32.8843	43.9	43.9	43.9	43.9	43.9	43.9	43.9	43.9
25	43.9	43.9	43.9	43.9	43.9	43.9	43.9	43.9	43.9	43.9	43.9	43.9	43.9	43.9	43.9	43.9	43.9	43.9	43.9	43.9	43.9	43.9	43.9	43.9	43.9	43.9	43.9	21.95	32.9697	0	0	0	0	43.9	43.9	43.9	43.9	43.9	43.9	32.9697	43.9	43.9	43.9	43.9	43.9	43.9	43.9	43.9	43.9
27	43.9	43.9	43.9	43.9	43.9	43.9	43.9	43.9	43.9	43.9	43.9	43.9	43.9	43.9	43.9	43.9	43.9	43.9	43.9	43.9	43.9	43.9	43.9	43.9	43.9	43.9	22.0476	32.8762	0	0	0	0	0	43.9	43.9	43.9	43.9	43.9	43.9	0	43.9	43.9	43.9	43.9	43.9	43.9	43.9	43.9	43.9
29	43.9	43.9	43.9	43.9	43.9	43.9	43.9	43.9	43.9	43.9	43.9	43.9	43.9	43.9	43.9	43.9	43.9	43.9	43.9	43.9	43.9	43.9	43.9	43.9	43.9	43.9	21.95	11.0281	0	0	0	0	0	11.0281	43.9	32.9781	32.9781	43.9	32.9781	21.95	43.9	43.9	43.9	43.9	43.9	43.9	43.9	43.9	43.9
31	43.9	43.9	43.9	43.9	43.9	43.9	43.9	43.9	43.9	43.9	43.9	43.9	43.9	43.9	43.9	43.9	43.9	43.9	43.9	43.9	43.9	43.9	43.9	43.9	43.9	21.95	32.9826	0	0	0	0	0	0	0	0	0	0	0	0	21.95	43.9	43.9	43.9	43.9	43.9	43.9	43.9	43.9	43.9
33	43.9	43.9	43.9	43.9	43.9	43.9	43.9	43.9	43.9	43.9	43.9	43.9	43.9	43.9	43.9	43.9	43.9	43.9	43.9	43.9	43.9	43.9	43.9	43.9	43.9	0	0	0	0	0	0	0	0	0	0	0	0	0	0	0	32.9872	43.9	43.9	43.9	43.9	43.9	43.9	43.9	43.9
35	43.9	43.9	43.9	43.9	43.9	43.9	43.9	43.9	43.9	43.9	43.9	43.9	43.9	43.9	43.9	43.9	43.9	43.9	43.9	43.9	43.9	43.9	43.9	32.9921	0	0	0	0	0	0	0	0	0	0	0	0	0	0	0	0	0	32.9921	43.9	43.9	43.9	43.9	43.9	43.9	43.9
37	43.9	43.9	43.9	43.9	43.9	43.9	43.9	43.9	43.9	43.9	43.9	43.9	43.9	43.9	43.9	43.9	43.9	43.9	43.9	43.9	43.9	43.9	43.9	11.0472	0	0	0	0	0	0	0	0	0	0	0	0	0	0	0	0	0	21.95	43.9	43.9	43.9	43.9	43.9	43.9	43.9
39	43.9	43.9	43.9	43.9	43.9	43.9	43.9	43.9	43.9	43.9	43.9	43.9	43.9	43.9	43.9	43.9	43.9	43.9	43.9	43.9	43.9	43.9	21.95	0	0	0	0	0	0	0	0	0	0	0	0	0	0	0	0	0	0	0	43.9	43.9	43.9	43.9	43.9	43.9	43.9
41	43.9	43.9	43.9	43.9	43.9	43.9	43.9	43.9	43.9	43.9	43.9	43.9	43.9	43.9	43.9	43.9	43.9	43.9	43.9	43.9	43.9	43.9	21.95	0	0	0	0	0	0	0	0	0	0	0	0	0	0	0	0	0	0	0	11.0583	33.0083	43.9	43.9	43.9	43.9	43.9
43	43.9	43.9	43.9	43.9	43.9	43.9	43.9	43.9	43.9	43.9	43.9	43.9	43.9	43.9	43.9	43.9	43.9	43.9	43.9	43.9	43.9	43.9	10.8857	0	0	0	0	0	0	0	0	0	0	0	0	0	0	0	0	0	0	0	0	11.0643	43.9	43.9	43.9	43.9	43.9
45	43.9	43.9	43.9	43.9	43.9	43.9	43.9	43.9	43.9	43.9	43.9	43.9	43.9	43.9	43.9	43.9	43.9	43.9	43.9	43.9	43.9	43.9	21.95	0	0	0	0	0	0	0	0	0	0	0	0	0	0	0	0	0	0	0	0	0	0	11.0708	11.0708	33.0208	43.9
47	43.9	43.9	43.9	43.9	43.9	43.9	43.9	43.9	43.9	43.9	43.9	43.9	43.9	43.9	43.9	43.9	43.9	43.9	43.9	43.9	43.9	43.9	21.95	0	0	0	0	0	0	0	0	0	0	0	0	0	0	0	0	0	0	0	0	0	0	0	32.8223	32.8223	43.9
49	43.9	43.9	43.9	43.9	43.9	43.9	43.9	43.9	43.9	43.9	43.9	43.9	43.9	43.9	43.9	43.9	43.9	43.9	43.9	43.9	43.9	33.0352	0	0	0	0	0	0	0	0	0	0	0	0	0	0	0	0	0	0	0	0	0	0	0	21.7296	43.9	43.9	21.95
51	43.9	43.9	43.9	43.9	43.9	43.9	43.9	43.9	43.9	43.9	43.9	43.9	43.9	43.9	43.9	43.9	43.9	43.9	43.9	43.9	43.9	0	0	0	0	0	0	0	0	0	0	0	0	0	0	0	0	0	0	0	0	0	0	0	0	0	0	0	22.1866
53	43.9	43.9	43.9	43.9	43.9	43.9	43.9	43.9	43.9	43.9	43.9	43.9	43.9	43.9	43.9	43.9	43.9	43.9	43.9	33.0521	11.1021	0	0	0	0	0	0	0	0	0	0	0	0	0	0	0	0	0	0	32.7979	21.95	0	0	0	0	0	0	0	0
55	43.9	43.9	43.9	43.9	43.9	43.9	43.9	22.2236	43.9	43.9	43.9	43.9	43.9	43.9	43.9	43.9	43.9	43.9	33.0618	11.1118	0	0	0	0	0	0	0	0	0	0	0	0	0	0	0	0	0	0	21.6764	43.9	21.6764	0	0	0	0	0	0	0	21.6764
57	43.9	43.9	43.9	43.9	43.9	43.9	43.9	43.9	21.655	33.0725	33.0725	43.9	43.9	43.9	43.9	43.9	43.9	33.0725	0	0	0	0	0	0	0	0	0	0	0	0	0	0	0	0	0	21.655	32.7775	43.9	43.9	43.9	43.9	21.95	0	0	0	0	0	21.95	43.9
59	43.9	43.9	43.9	43.9	43.9	43.9	43.9	22.2688	22.2688	0	21.95	33.0844	43.9	43.9	43.9	43.9	22.2688	0	0	0	0	0	0	0	0	0	0	0	0	0	0	0	0	0	32.7656	43.9	43.9	43.9	43.9	43.9	32.7656	0	0	0	21.6312	21.6312	10.8156	43.9	43.9
61	43.9	43.9	43.9	43.9	43.9	33.0978	0	0	0	0	0	11.1478	0	11.1478	0	0	0	0	0	0	0	0	0	0	0	0	0	0	0	0	0	0	0	0	33.0978	43.9	43.9	43.9	43.9	43.9	43.9	0	0	10.8022	43.9	43.9	43.9	43.9	43.9
63	43.9	43.9	43.9	43.9	43.9	43.9	21.574	10.787	0	0	0	0	0	0	0	0	0	0	0	0	0	0	0	0	0	0	0	0	0	0	0	0	0	0	0	22.3259	43.9	33.113	21.95	43.9	43.9	32.737	43.9	22.3259	11.163	11.163	43.9	43.9	43.9
65	43.9	33.1304	11.1804	33.1304	43.9	22.3608	11.1804	11.1804	0	0	0	0	0	0	0	0	0	0	0	0	0	0	0	0	0	0	0	0	0	0	0	0	0	0	0	0	0	11.1804	10.7696	43.9	43.9	21.5392	10.7696	0	0	32.7196	22.3608	43.9	43.9
67	0	0	21.4987	32.6994	43.9	32.6994	33.1506	0	0	0	0	0	0	0	0	0	0	0	0	0	0	0	0	0	0	0	0	0	0	0	0	0	0	0	0	0	0	0	0	33.1506	43.9	22.4013	32.6994	0	0	0	10.7494	32.6994	43.9
69	32.6755	43.9	43.9	43.9	43.9	32.6755	10.7255	0	0	0	0	0	0	0	0	0	10.7255	21.451	0	0	0	0	0	0	21.451	10.7255	22.449	22.449	11.2245	0	22.449	33.1745	21.95	32.6755	0	10.7255	21.451	32.6755	0	32.6755	43.9	11.2245	0	0	0	43.9	43.9	43.9	43.9
71	33.2032	43.9	43.9	43.9	43.9	43.9	43.9	43.9	21.3937	21.3937	21.3937	32.6468	43.9	43.9	43.9	43.9	43.9	43.9	43.9	43.9	43.9	43.9	33.2032	33.2032	33.2032	0	0	0	0	0	21.3937	43.9	43.9	32.6468	10.6968	43.9	11.2532	0	0	0	0	0	0	21.3937	32.6468	43.9	43.9	43.9	43.9
73	43.9	43.9	43.9	43.9	43.9	43.9	43.9	43.9	43.9	43.9	43.9	43.9	43.9	43.9	43.9	43.9	43.9	43.9	43.9	43.9	43.9	43.9	10.6617	0	0	10.6617	21.3235	21.3235	32.6117	10.6617	43.9	10.6617	0	32.6117	11.2883	33.2383	10.6617	21.95	10.6617	10.6617	0	21.3235	43.9	43.9	43.9	43.9	43.9	43.9	43.9
75	43.9	43.9	43.9	43.9	43.9	43.9	43.9	43.9	43.9	43.9	43.9	43.9	43.9	43.9	43.9	43.9	43.9	43.9	43.9	43.9	43.9	43.9	43.9	32.5675	43.9	22.6649	11.3324	11.3324	22.6649	33.2824	43.9	33.2824	22.6649	33.2824	33.2824	22.6649	22.6649	22.6649	22.6649	22.6649	43.9	43.9	43.9	43.9	43.9	43.9	43.9	43.9	33.2824
77	43.9	43.9	43.9	43.9	43.9	43.9	43.9	43.9	43.9	43.9	43.9	43.9	43.9	43.9	43.9	43.9	43.9	43.9	43.9	43.9	43.9	43.9	43.9	32.5101	21.1203	32.5101	32.5101	33.3399	32.5101	43.9	32.5101	43.9	21.1203	32.5101	32.5101	21.1203	32.5101	0	0	0	21.95	43.9	43.9	33.3399	11.3899	0	0	0	0
79	43.9	43.9	43.9	43.9	43.9	43.9	43.9	43.9	43.9	43.9	43.9	43.9	43.9	43.9	43.9	43.9	43.9	43.9	43.9	43.9	43.9	43.9	43.9	43.9	43.9	43.9	43.9	32.4323	43.9	43.9	32.4323	20.9645	43.9	32.4323	22.9355	0	11.4677	0	0	0	0	0	33.4177	20.9645	20.9645	20.9645	0	0	0
81	43.9	43.9	43.9	43.9	43.9	43.9	43.9	43.9	43.9	43.9	43.9	43.9	43.9	43.9	43.9	43.9	43.9	43.9	43.9	43.9	43.9	43.9	43.9	43.9	43.9	43.9	43.9	43.9	43.9	43.9	43.9	43.9	43.9	32.3203	20.7406	20.7406	0	0	0	0	0	0	0	0	11.5797	11.5797	20.7406	10.3703	0
83	43.9	43.9	43.9	43.9	43.9	43.9	43.9	43.9	43.9	43.9	43.9	43.9	43.9	43.9	43.9	43.9	43.9	43.9	43.9	43.9	43.9	43.9	43.9	43.9	43.9	43.9	43.9	43.9	43.9	43.9	43.9	43.9	43.9	43.9	43.9	43.9	43.9	43.9	43.9	20.3899	20.3899	20.3899	20.3899	20.3899	20.3899	20.3899	20.3899	43.9	43.9
85	43.9	43.9	43.9	43.9	43.9	43.9	43.9	43.9	43.9	43.9	43.9	43.9	43.9	43.9	43.9	43.9	43.9	43.9	43.9	43.9	43.9	43.9	43.9	43.9	43.9	43.9	43.9	43.9	43.9	43.9	43.9	43.9	43.9	43.9	43.9	43.9	43.9	43.9	43.9	43.9	43.9	43.9	43.9	43.9	43.9	43.9	43.9	43.9	43.9
87	43.9	43.9	43.9	43.9	43.9	43.9	43.9	43.9	43.9	43.9	43.9	43.9	43.9	43.9	43.9	43.9	43.9	43.9	43.9	43.9	43.9	43.9	43.9	43.9	43.9	43.9	43.9	43.9	43.9	43.9	43.9	43.9	43.9	43.9	43.9	43.9	43.9	43.9	43.9	43.9	43.9	43.9	43.9	43.9	43.9	43.9	43.9	43.9	43.9
89	43.9	43.9	43.9	43.9	43.9	43.9	43.9	43.9	43.9	43.9	43.9	43.9	43.9	43.9	43.9	43.9	43.9	43.9	43.9	43.9	43.9	43.9	43.9	43.9	43.9	43.9	43.9	43.9	43.9	43.9	43.9	43.9	43.9	43.9	43.9	43.9	43.9	43.9	43.9	43.9	43.9	43.9	43.9	43.9	43.9	43.9	43.9	43.9	43.9
[truncated: 95 more columns]

## Sheet: termites
lat (degN) \ lon (degE)	-178.75	-176.25	-173.75	-171.25	-168.75	-166.25	-163.75	-161.25	-158.75	-156.25	-153.75	-151.25	-148.75	-146.25	-143.75	-141.25	-138.75	-136.25	-133.75	-131.25	-128.75	-126.25	-123.75	-121.25	-118.75	-116.25	-113.75	-111.25	-108.75	-106.25	-103.75	-101.25	-98.75	-96.25	-93.75	-91.25	-88.75	-86.25	-83.75	-81.25	-78.75	-76.25	-73.75	-71.25	-68.75	-66.25	-63.75	-61.25	-58.75
-89	0	0	0	0	0	0	0	0	0	0	0	0	0	0	0	0	0	0	0	0	0	0	0	0	0	0	0	0	0	0	0	0	0	0	0	0	0	0	0	0	0	0	0	0	0	0	0	0	0
-87	0	0	0	0	0	0	0	0	0	0	0	0	0	0	0	0	0	0	0	0	0	0	0	0	0	0	0	0	0	0	0	0	0	0	0	0	0	0	0	0	0	0	0	0	0	0	0	0	0
-85	0	0	0	0	0	0	0	0	0	0	0	0	0	0	0	0	0	0	0	0	0	0	0	0	0	0	0	0	0	0	0	0	0	0	0	0	0	0	0	0	0	0	0	0	0	0	0	0	0
-83	0	0	0	0	0	0	0	0	0	0	0	0	0	0	0	0	0	0	0	0	0	0	0	0	0	0	0	0	0	0	0	0	0	0	0	0	0	0	0	0	0	0	0	0	0	0	0	0	0
-81	0	0	0	0	0	0	0	0	0	0	0	0	0	0	0	0	0	0	0	0	0	0	0	0	0	0	0	0	0	0	0	0	0	0	0	0	0	0	0	0	0	0	0	0	0	0	0	0	0
-79	0	0	0	0	0	0	0	0	0	0	0	0	0	0	0	0	0	0	0	0	0	0	0	0	0	0	0	0	0	0	0	0	0	0	0	0	0	0	0	0	0	0	0	0	0	0	0	0	0
-77	0	0	0	0	0	0	0	0	0	0	0	0	0	0	0	0	0	0	0	0	0	0	0	0	0	0	0	0	0	0	0	0	0	0	0	0	0	0	0	0	0	0	0	0	0	0	0	0	0
-75	0	0	0	0	0	0	0	0	0	0	0	0	0	0	0	0	0	0	0	0	0	0	0	0	0	0	0	0	0	0	0	0	0	0	0	0	0	0	0	0	0	0	0	0	0	0	0	0	0
-73	0	0	0	0	0	0	0	0	0	0	0	0	0	0	0	0	0	0	0	0	0	0	0	0	0	0	0	0	0	0	0	0	0	0	0	0	0	0	0	0	0	0	0	0	0	0	0	0	0
-71	0	0	0	0	0	0	0	0	0	0	0	0	0	0	0	0	0	0	0	0	0	0	0	0	0	0	0	0	0	0	0	0	0	0	0	0	0	0	0	0	0	0	0	0	0	0	0	0	0
-69	0	0	0	0	0	0	0	0	0	0	0	0	0	0	0	0	0	0	0	0	0	0	0	0	0	0	0	0	0	0	0	0	0	0	0	0	0	0	0	0	0	0	0	0	0	0	0	0	0
-67	0	0	0	0	0	0	0	0	0	0	0	0	0	0	0	0	0	0	0	0	0	0	0	0	0	0	0	0	0	0	0	0	0	0	0	0	0	0	0	0	0	0	0	0	0	0	0	0	0
-65	0	0	0	0	0	0	0	0	0	0	0	0	0	0	0	0	0	0	0	0	0	0	0	0	0	0	0	0	0	0	0	0	0	0	0	0	0	0	0	0	0	0	0	0	0	0	0	0	0
-63	0	0	0	0	0	0	0	0	0	0	0	0	0	0	0	0	0	0	0	0	0	0	0	0	0	0	0	0	0	0	0	0	0	0	0	0	0	0	0	0	0	0	0	0	0	0	0	0	0
-61	0	0	0	0	0	0	0	0	0	0	0	0	0	0	0	0	0	0	0	0	0	0	0	0	0	0	0	0	0	0	0	0	0	0	0	0	0	0	0	0	0	0	0	0	0	0	0	0	0
-59	0	0	0	0	0	0	0	0	0	0	0	0	0	0	0	0	0	0	0	0	0	0	0	0	0	0	0	0	0	0	0	0	0	0	0	0	0	0	0	0	0	0	0	0	0	0	0	0	0
-57	0	0	0	0	0	0	0	0	0	0	0	0	0	0	0	0	0	0	0	0	0	0	0	0	0	0	0	0	0	0	0	0	0	0	0	0	0	0	0	0	0	0	0	0	0	0	0	0	0
-55	0	0	0	0	0	0	0	0	0	0	0	0	0	0	0	0	0	0	0	0	0	0	0	0	0	0	0	0	0	0	0	0	0	0	0	0	0	0	0	0	0	0	0	25.4261	30.7479	18.4487	0	0	0
-53	0	0	0	0	0	0	0	0	0	0	0	0	0	0	0	0	0	0	0	0	0	0	0	0	0	0	0	0	0	0	0	0	0	0	0	0	0	0	0	0	0	0	24.4363	74.9628	75.0488	0	0	0	0
-51	0	0	0	0	0	0	0	0	0	0	0	0	0	0	0	0	0	0	0	0	0	0	0	0	0	0	0	0	0	0	0	0	0	0	0	0	0	0	0	0	0	0	36.4434	80.4152	34.1337	0	0	0	24.8425
-49	0	0	0	0	0	0	0	0	0	0	0	0	0	0	0	0	0	0	0	0	0	0	0	0	0	0	0	0	0	0	0	0	0	0	0	0	0	0	0	0	0	0	34.9804	47.4532	41.4106	4.6422	0	0	0
-47	0	0	0	0	0	0	0	0	0	0	0	0	0	0	0	0	0	0	0	0	0	0	0	0	0	0	0	0	0	0	0	0	0	0	0	0	0	0	0	0	0	0	50.0126	50.2239	45.9605	18.2982	0	0	0
-45	0	0	0	0	0	0	0	0	0	0	0	0	0	0	0	0	0	0	0	0	0	0	0	0	0	0	0	0	0	0	0	0	0	0	0	0	0	0	0	0	0	0	24.1897	54.8276	45.9605	27.7367	0	0	0
-43	0	0	0	0	0	0	0	0	0	0	0	0	0	0	0	0	0	0	0	0	0	0	0	0	0	0	0	0	0	0	0	0	0	0	0	0	0	0	0	0	0	0	24.3945	54.8276	45.9605	45.9605	9.2669	0	0
-41	0	0	0	0	0	0	0	0	0	0	0	0	0	0	0	0	0	0	0	0	0	0	0	0	0	0	0	0	0	0	0	0	0	0	0	0	0	0	0	0	0	0	36.4434	54.8276	45.9605	45.9605	23.1546	4.6309	0
-39	0	0	0	0	0	0	0	0	0	0	0	0	0	0	0	0	0	0	0	0	0	0	0	0	0	0	0	0	0	0	0	0	0	0	0	0	0	0	0	0	0	0	29.7501	35.9006	45.9605	36.8334	57.1338	83.5727	63.2071
-37	0	0	0	0	0	0	0	0	0	0	0	0	0	0	0	0	0	0	0	0	0	0	0	0	0	0	0	0	0	0	0	0	0	0	0	0	0	0	0	0	0	0	21.26	67.8977	45.9605	45.9605	87.3311	141.135	131.793
-35	0	0	0	0	0	0	0	0	0	0	0	0	0	0	0	0	0	0	0	0	0	0	0	0	0	0	0	0	0	0	0	0	0	0	0	0	0	0	0	0	0	0	4.5679	46.1625	61.9789	45.9605	118.052	150.641	147.564
-33	0	0	0	0	0	0	0	0	0	0	0	0	0	0	0	0	0	0	0	0	0	0	0	0	0	0	0	0	0	0	0	0	0	0	0	0	0	0	0	0	0	0	0	52.7798	77.8026	45.9605	112.53	150.595	81.8835
-31	0	0	0	0	0	0	0	0	0	0	0	0	0	0	0	0	0	0	0	0	0	0	0	0	0	0	0	0	0	0	0	0	0	0	0	0	0	0	0	0	0	0	0	68.6106	77.8027	45.9605	80.2703	61.7883	93.6701
-29	0	0	0	0	0	0	0	0	0	0	0	0	0	0	0	0	0	0	0	0	0	0	0	0	0	0	0	0	0	0	0	0	0	0	0	0	0	0	0	0	0	0	0	18.3842	202.911	45.9605	82.3796	45.9605	157.842
-27	0	0	0	0	0	0	0	0	0	0	0	0	0	0	0	0	0	0	0	0	0	0	0	0	0	0	0	0	0	0	0	0	0	0	0	0	0	0	0	0	0	0	0	18.3842	438.336	326.294	45.9605	76.2826	112.726
-25	0	0	0	0	0	0	0	0	0	0	0	0	0	0	0	0	0	0	0	0	0	0	0	0	0	0	0	0	0	0	0	0	0	0	0	0	0	0	0	0	0	0	0	18.3842	438.336	438.336	90.8518	45.9605	55.0283
-23	0	0	0	0	0	0	0	0	0	0	0	0	0	0	0	0	0	0	0	0	0	0	0	0	0	0	0	0	0	0	0	0	0	0	0	0	0	0	0	0	0	0	0	9.158	281.386	438.336	135.38	45.9605	45.9605
-21	0	0	0	0	0	0	0	0	0	0	0	0	0	0	0	0	0	0	0	0	0	0	0	0	0	0	0	0	0	0	0	0	0	0	0	0	0	0	0	0	0	0	0	0	281.386	359.598	258.677	45.9605	85.3299
-19	0	0	0	0	0	0	0	0	0	0	0	0	0	0	0	0	0	0	0	0	0	0	0	0	0	0	0	0	0	0	0	0	0	0	0	0	0	0	0	0	0	0	0	9.2197	438.336	438.336	179.955	45.9605	124.436
-17	0	0	0	0	0	0	0	0	0	0	0	0	0	0	0	0	0	0	0	0	0	0	0	0	0	0	0	0	0	0	0	0	0	0	0	0	0	0	0	0	0	0	4.6083	355.277	398.993	331.282	348.6	202.623	370.985
-15	0	0	0	0	0	0	0	0	0	0	0	0	0	0	0	0	0	0	0	0	0	0	0	0	0	0	0	0	0	0	0	0	0	0	0	0	0	0	0	0	0	9.2136	360.044	438.336	370.726	337.039	370.884	303.353	438.336
-13	0	0	0	0	0	0	0	0	0	0	0	0	0	0	0	0	0	0	0	0	0	0	0	0	0	0	0	0	0	0	0	0	0	0	0	0	0	0	0	0	0	263.178	286.869	331.353	286.357	320.055	269.508	337.175	438.336
-11	0	0	0	0	0	0	0	0	0	0	0	0	0	0	0	0	0	0	0	0	0	0	0	0	0	0	0	0	0	0	0	0	0	0	0	0	0	0	0	0	43.9086	360.754	269.508	269.508	269.508	269.508	353.893	286.362	337.039
-9	0	0	0	0	0	0	0	0	0	0	0	0	0	0	0	0	0	0	0	0	0	0	0	0	0	0	0	0	0	0	0	0	0	0	0	0	0	0	0	0	175.457	336.992	269.508	269.508	269.508	269.508	269.508	269.508	269.508
-7	0	0	0	0	0	0	0	0	0	0	0	0	0	0	0	0	0	0	0	0	0	0	0	0	0	0	0	0	0	0	0	0	0	0	0	0	0	0	0	9.202	169.229	303.31	269.508	269.508	269.508	269.508	269.508	269.508	269.508
-5	0	0	0	0	0	0	0	0	0	0	0	0	0	0	0	0	0	0	0	0	0	0	0	0	0	0	0	0	0	0	0	0	0	0	0	0	0	0	0	18.3846	224.833	269.508	269.508	269.508	269.508	269.508	269.508	269.508	269.508
-3	0	0	0	0	0	0	0	0	0	0	0	0	0	0	0	0	0	0	0	0	0	0	0	0	0	0	0	0	0	0	0	0	0	0	0	0	0	0	0	18.3849	296.411	269.508	269.508	269.508	269.508	269.508	269.508	269.508	269.508
-1	0	0	0	0	0	0	0	0	0	0	0	0	0	0	0	0	0	0	0	0	0	0	0	0	0	0	0	0	0	0	0	0	0	0	0	0	0	0	0	107.804	321.719	269.508	269.508	269.508	269.508	269.508	269.508	269.508	269.508
1	0	0	0	0	0	0	0	0	0	0	0	0	0	0	0	0	0	0	0	0	0	0	0	0	0	0	0	0	0	0	0	0	0	0	0	0	0	0	0	0.0004	215.615	269.508	269.508	269.508	269.508	269.508	269.508	269.508	269.508
3	0	0	0	0	0	0	0	0	0	0	0	0	0	0	0	0	0	0	0	0	0	0	0	0	0	0	0	0	0	0	0	0	0	0	0	0	0	0	0	0	26.9635	242.57	286.383	353.884	269.508	269.508	269.508	303.258	387.68
5	0	0	0	0	0	0	0	0	0	0	0	0	0	0	0	0	0	0	0	0	0	0	0	0	0	0	0	0	0	0	0	0	0	0	0	0	0	0	0	0	0	200.273	320.195	387.726	404.57	269.508	269.508	404.57	303.3
7	0	0	0	0	0	0	0	0	0	0	0	0	0	0	0	0	0	0	0	0	0	0	0	0	0	0	0	0	0	0	0	0	0	0	0	0	0	0	0	53.8435	53.9025	269.508	286.409	320.211	438.336	337.003	320.102	286.373	161.762
9	0	0	0	0	0	0	0	0	0	0	0	0	0	0	0	0	0	0	0	0	0	0	0	0	0	0	0	0	0	0	0	0	0	0	0	0	0	0	102.614	156.739	90.1439	144.12	219.746	200.337	320.226	354.038	354.038	232.587	0
11	0	0	0	0	0	0	0	0	0	0	0	0	0	0	0	0	0	0	0	0	0	0	0	0	0	0	0	0	0	0	0	0	0	0	0	0	0	43.7607	151.564	0	0	9.2078	117.103	72.3171	188.793	80.9899	53.9932	43.7607	0
13	0	0	0	0	0	0	0	0	0	0	0	0	0	0	0	0	0	0	0	0	0	0	0	0	0	0	0	0	0	0	0	0	0	0	0	0	129.385	240.573	161.596	0	0	0	0	0	0	0	0	0	0
15	0	0	0	0	0	0	0	0	0	0	0	0	0	0	0	0	0	0	0	0	0	0	0	0	0	0	0	0	0	0	0	0	0	0	26.8875	228.179	234.738	255.217	161.831	0	0	0	0	0	0	0	0	0	0
17	0	0	0	0	0	0	0	0	0	0	0	0	0	0	0	0	0	0	0	0	0	0	0	0	0	0	0	0	0	0	0	0	54.5744	197.8	143.612	242.486	215.607	0	0	0	0	0	0	0	0	0	0	0	0
19	0	0	0	0	0	0	0	0	0	0	0	0	0	0	0	0	0	0	0	0	0	0	0	0	0	0	0	0	0	0	133.384	68.4954	134.867	139.432	81.0959	188.899	259.308	43.7015	0	0	43.9662	43.965	43.6865	259.293	54.064	54.064	0	0	0
21	0	0	0	0	0	0	0	0	0	0	0	0	0	0	0	0	0	0	0	0	0	0	0	0	0	0	0	0	0	54.0824	73.833	198.071	144.277	53.9016	0	27.4935	129.265	53.9016	0	0	18.3535	27.6379	0	0	0	0	0	0	0
23	0	0	0	0	0	0	0	0	0	0	0	0	0	0	0	0	0	0	0	0	0	0	0	0	0	0	0	9.158	0	18.3842	113.071	127.163	126.187	0	0	0	0	0	9.2262	97.2183	9.2261	0	0	0	0	0	0	0	0
25	0	0	0	0	0	0	0	0	0	0	0	0	0	0	0	0	0	0	0	0	0	0	0	0	0	0	0	18.3842	41.0467	67.4389	83.9427	45.9605	95.3049	13.6451	0	0	0	0	0	87.3103	0	0	0	0	0	0	0	0	0
27	0	0	0	0	0	0	0	0	0	0	0	0	0	0	0	0	0	0	0	0	0	0	0	0	0	0	27.4946	18.3433	98.8772	177.401	124.087	45.9605	227.19	33.4714	0	0	0	0	0	200.326	0	0	0	0	0	0	0	0	0
29	0	0	0	0	0	0	0	0	0	0	0	0	0	0	0	0	0	0	0	0	0	0	0	0	0	0	22.958	41.3422	18.3842	104.732	45.9605	202.911	340.781	184.879	46.7926	87.2424	0	0	16.6546	16.6545	0	0	0	0	0	0	0	0	0
31	0	0	0	0	0	0	0	0	0	0	0	0	0	0	0	0	0	0	0	0	0	0	0	0	0	24.2957	27.4798	48.9007	104.614	69.9675	77.9698	101.954	150.553	103.274	70.4066	70.4066	76.6477	92.5564	146.033	36.4433	0	0	0	0	0	0	0	0	0
33	0	0	0	0	0	0	0	0	0	0	0	0	0	0	0	0	0	0	0	0	0	0	0	0	6.0396	45.7804	45.9605	48.9329	99.7819	96.6627	97.6989	154.843	166.306	142.761	60.739	124.71	116.849	132.751	140.702	108.536	12.079	0	0	0	0	0	0	0	0
35	0	0	0	0	0	0	0	0	0	0	0	0	0	0	0	0	0	0	0	0	0	0	0	12.0734	72.9437	45.9605	64.8192	99.4763	67.182	80.2268	129.77	138.18	167.357	145.903	92.6263	140.702	124.612	124.807	124.807	140.702	116.762	32.1683	0	0	0	0	0	0	0
37	0	0	0	0	0	0	0	0	0	0	0	0	0	0	0	0	0	0	0	0	0	0	6.034	112.201	70.9448	45.9605	64.942	57.7639	67.8782	60.739	133.924	167.357	167.357	167.357	119.776	116.766	140.702	140.702	100.773	100.984	100.773	44.4921	0	0	0	0	0	0	0
39	0	0	0	0	0	0	0	0	0	0	0	0	0	0	0	0	0	0	0	0	0	0	37.1752	86.8751	64.7457	45.9605	47.4488	72.3285	60.739	60.739	150.522	167.357	167.357	167.357	161.074	161.988	153.935	132.536	132.649	68.6789	100.664	132.649	12.062	0	0	0	0	0	0
41	0	0	0	0	0	0	0	0	0	0	0	0	0	0	0	0	0	0	0	0	0	0	36.4434	86.6698	77.8026	61.7608	35.4764	72.639	96.4602	99.4384	125.542	125.541	125.517	125.517	125.517	125.517	125.517	112.562	98.4739	79.1877	85.2155	94.8586	66.6343	32.5481	0	0	0	0	0
43	0	0	0	0	0	0	0	0	0	0	0	0	0	0	0	0	0	0	0	0	0	0	48.6902	73.5988	109.515	125.566	125.566	99.6351	112.706	125.566	112.706	125.566	125.527	125.517	125.523	122.309	97.2064	43.7293	98.48	76.4373	76.7933	104.905	102.898	87.2805	0	0	0	0	0
45	0	0	0	0	0	0	0	0	0	0	0	0	0	0	0	0	0	0	0	0	0	0	41.2595	91.4858	80.1306	80.3567	67.1652	80.0175	104.457	104.674	125.551	125.561	125.517	125.517	110.845	114.228	79.0314	32.8923	36.5494	44.1109	80.3422	93.2415	91.3251	75.4414	64.4138	42.3584	42.3584	18.0628	0
47	0	0	0	0	0	0	0	0	0	0	0	0	0	0	0	0	0	0	0	0	0	0	36.4434	73.8257	125.527	73.6946	67.1611	105.936	125.566	125.556	125.517	125.527	125.517	112.683	70.4559	58.4217	30.6535	18.3921	60.739	60.739	60.739	60.7391	65.6429	75.4506	60.739	60.739	0	12.2614	0
49	0	0	0	0	0	0	0	0	0	0	0	0	0	0	0	0	0	0	0	0	0	12.0259	48.4693	60.739	73.8345	60.739	86.5252	125.522	125.546	125.537	125.517	125.517	125.517	112.692	60.739	60.739	30.3086	42.3345	60.739	60.739	60.739	60.739	60.739	60.739	60.739	36.6873	24.2956	0	24.4177
51	0	0	0	0	0	0	0	0	0	0	0	0	0	0	0	0	0	0	0	0	12.1478	48.7221	55.1301	93.3474	60.739	49.0074	112.422	125.517	125.517	125.517	125.517	112.701	93.4771	80.3819	60.739	60.739	60.739	24.4265	18.418	30.6967	24.5572	48.5914	60.739	60.739	60.739	60.739	60.739	48.4604	30.0424
53	0	0	0	0	0	0	0	0	0	0	0	0	0	0	0	0	0	0	6.0036	6.0036	36.162	60.739	60.739	60.739	80.112	67.2968	99.606	125.517	106.309	93.5033	74.9434	48.7319	30.2992	54.5948	60.739	60.739	60.739	12.1478	0	0	36.4436	60.739	60.739	60.739	60.739	48.4505	48.7319	60.739	60.739
55	0	0	0	0	0	0	0	11.9963	0	0	0	0	0	0	0	0	0	0	5.9982	29.9909	60.7391	60.7391	60.7391	60.7391	60.7391	60.7391	61.2995	61.2995	36.4434	60.7391	42.2901	54.5894	60.7391	60.7391	60.7391	36.7463	12.2993	0	0	0	6.1497	54.7409	42.7445	42.7445	42.5931	42.5931	18.4489	30.7482	24.5985
57	0	0	0	0	0	0	0	0	0	0	0	0	0	0	0	0	0	11.9847	18.1401	30.4511	42.5989	17.977	24.4587	60.739	60.739	60.739	48.7544	48.4281	30.4511	30.7773	42.762	54.7467	60.739	48.7544	0	0	0	0	0	0	0	0	0	0	36.4434	48.4281	0	0	0
59	0	0	0	0	0	0	0	0	17.9572	5.9857	0	23.943	0	0	0	0	0	0	36.4434	48.4149	54.577	42.2528	48.4149	60.739	48.7676	48.7675	36.6198	36.2671	11.9715	12.3241	12.3241	48.5912	42.7818	18.4862	0	0	0	0	0	0	0	0	0	0	0	0	0	0	0
61	0	0	0	0	0	0	0	0	0	0	0	0	0	0	0	0	0	0	0	0	0	0	0	0	0	0	0	0	0	0	0	0	0	0	0	0	0	0	0	0	0	0	0	0	0	0	0	0	0
63	0	0	0	0	0	0	0	0	0	0	0	0	0	0	0	0	0	0	0	0	0	0	0	0	0	0	0	0	0	0	0	0	0	0	0	0	0	0	0	0	0	0	0	0	0	0	0	0	0
65	0	0	0	0	0	0	0	0	0	0	0	0	0	0	0	0	0	0	0	0	0	0	0	0	0	0	0	0	0	0	0	0	0	0	0	0	0	0	0	0	0	0	0	0	0	0	0	0	0
67	0	0	0	0	0	0	0	0	0	0	0	0	0	0	0	0	0	0	0	0	0	0	0	0	0	0	0	0	0	0	0	0	0	0	0	0	0	0	0	0	0	0	0	0	0	0	0	0	0
69	0	0	0	0	0	0	0	0	0	0	0	0	0	0	0	0	0	0	0	0	0	0	0	0	0	0	0	0	0	0	0	0	0	0	0	0	0	0	0	0	0	0	0	0	0	0	0	0	0
71	0	0	0	0	0	0	0	0	0	0	0	0	0	0	0	0	0	0	0	0	0	0	0	0	0	0	0	0	0	0	0	0	0	0	0	0	0	0	0	0	0	0	0	0	0	0	0	0	0
73	0	0	0	0	0	0	0	0	0	0	0	0	0	0	0	0	0	0	0	0	0	0	0	0	0	0	0	0	0	0	0	0	0	0	0	0	0	0	0	0	0	0	0	0	0	0	0	0	0
75	0	0	0	0	0	0	0	0	0	0	0	0	0	0	0	0	0	0	0	0	0	0	0	0	0	0	0	0	0	0	0	0	0	0	0	0	0	0	0	0	0	0	0	0	0	0	0	0	0
77	0	0	0	0	0	0	0	0	0	0	0	0	0	0	0	0	0	0	0	0	0	0	0	0	0	0	0	0	0	0	0	0	0	0	0	0	0	0	0	0	0	0	0	0	0	0	0	0	0
79	0	0	0	0	0	0	0	0	0	0	0	0	0	0	0	0	0	0	0	0	0	0	0	0	0	0	0	0	0	0	0	0	0	0	0	0	0	0	0	0	0	0	0	0	0	0	0	0	0
81	0	0	0	0	0	0	0	0	0	0	0	0	0	0	0	0	0	0	0	0	0	0	0	0	0	0	0	0	0	0	0	0	0	0	0	0	0	0	0	0	0	0	0	0	0	0	0	0	0
83	0	0	0	0	0	0	0	0	0	0	0	0	0	0	0	0	0	0	0	0	0	0	0	0	0	0	0	0	0	0	0	0	0	0	0	0	0	0	0	0	0	0	0	0	0	0	0	0	0
85	0	0	0	0	0	0	0	0	0	0	0	0	0	0	0	0	0	0	0	0	0	0	0	0	0	0	0	0	0	0	0	0	0	0	0	0	0	0	0	0	0	0	0	0	0	0	0	0	0
87	0	0	0	0	0	0	0	0	0	0	0	0	0	0	0	0	0	0	0	0	0	0	0	0	0	0	0	0	0	0	0	0	0	0	0	0	0	0	0	0	0	0	0	0	0	0	0	0	0
89	0	0	0	0	0	0	0	0	0	0	0	0	0	0	0	0	0	0	0	0	0	0	0	0	0	0	0	0	0	0	0	0	0	0	0	0	0	0	0	0	0	0	0	0	0	0	0	0	0
[truncated: 95 more columns]

## Sheet: terrestrial geological
lat (degN) \ lon (degE)	-178.75	-176.25	-173.75	-171.25	-168.75	-166.25	-163.75	-161.25	-158.75	-156.25	-153.75	-151.25	-148.75	-146.25	-143.75	-141.25	-138.75	-136.25	-133.75	-131.25	-128.75	-126.25	-123.75	-121.25	-118.75	-116.25	-113.75	-111.25	-108.75	-106.25	-103.75	-101.25	-98.75	-96.25	-93.75	-91.25	-88.75	-86.25	-83.75	-81.25	-78.75	-76.25	-73.75	-71.25	-68.75	-66.25	-63.75	-61.25	-58.75
-89	0	0	0	0	0	0	0	0	0	0	0	0	0	0	0	0	0	0	0	0	0	0	0	0	0	0	0	0	0	0	0	0	0	0	0	0	0	0	0	0	0	0	0	0	0	0	0	0	0
-87	0	0	0	0	0	0	0	0	0	0	0	0	0	0	0	0	0	0	0	0	0	0	0	0	0	0	0	0	0	0	0	0	0	0	0	0	0	0	0	0	0	0	0	0	0	0	0	0	0
-85	0	0	0	0	0	0	0	0	0	0	0	0	0	0	0	0	0	0	0	0	0	0	0	0	0	0	0	0	0	0	0	0	0	0	0	0	0	0	0	0	0	0	0	0	0	0	0	0	0
-83	0	0	0	0	0	0	0	0	0	0	0	0	0	0	0	0	0	0	0	0	0	0	0	0	0	0	0	0	0	0	0	0	0	0	0	0	0	0	0	0	0	0	0	0	0	0	0	0	0
-81	0	0	0	0	0	0	0	0	0	0	0	0	0	0	0	0	0	0	0	0	0	0	0	0	0	0	0	0	0	0	0	0	0	0	0	0	0	0	0	0	0	0	0	0	0	0	0	0	0
-79	0	0	0	0	0	0	0	0	0	0	0	0	0	0	0	0	0	0	0	0	0	0	0	0	0	0	0	0	0	0	0	0	0	0	0	0	0	0	0	0	0	0	0	0	0	0	0	0	0
-77	0	0	0	0	0	0	0	0	0	0	0	0	0	0	0	0	0	0	0	0	0	0	0	0	0	0	0	0	0	0	0	0	0	0	0	0	0	0	0	0	0	0	0	0	0	0	0	0	0
-75	0	0	0	0	0	0	0	0	0	0	0	0	0	0	0	0	0	0	0	0	0	0	0	0	0	0	0	0	0	0	0	0	0	0	0	0	0	0	0	0	0	0	0	0	0	0	0	0	0
-73	0	0	0	0	0	0	0	0	0	0	0	0	0	0	0	0	0	0	0	0	0	0	0	0	0	0	0	0	0	0	0	0	0	0	0	0	0	0	0	0	0	0	0	0	0	0	0	0	0
-71	0	0	0	0	0	0	0	0	0	0	0	0	0	0	0	0	0	0	0	0	0	0	0	0	0	0	0	0	0	0	0	0	0	0	0	0	0	0	0	0	0	0	0	0	0	0	0	0	0
-69	0	0	0	0	0	0	0	0	0	0	0	0	0	0	0	0	0	0	0	0	0	0	0	0	0	0	0	0	0	0	0	0	0	0	0	0	0	0	0	0	0	0	0	0	0	0	0	0	0
-67	0	0	0	0	0	0	0	0	0	0	0	0	0	0	0	0	0	0	0	0	0	0	0	0	0	0	0	0	0	0	0	0	0	0	0	0	0	0	0	0	0	0	0	0	0	0	0	0	0
-65	0	0	0	0	0	0	0	0	0	0	0	0	0	0	0	0	0	0	0	0	0	0	0	0	0	0	0	0	0	0	0	0	0	0	0	0	0	0	0	0	0	0	0	0	0	0	0	0	0
-63	0	0	0	0	0	0	0	0	0	0	0	0	0	0	0	0	0	0	0	0	0	0	0	0	0	0	0	0	0	0	0	0	0	0	0	0	0	0	0	0	0	0	0	0	0	0	0	0	0
-61	0	0	0	0	0	0	0	0	0	0	0	0	0	0	0	0	0	0	0	0	0	0	0	0	0	0	0	0	0	0	0	0	0	0	0	0	0	0	0	0	0	0	0	0	0	0	0	0	0
-59	0	0	0	0	0	0	0	0	0	0	0	0	0	0	0	0	0	0	0	0	0	0	0	0	0	0	0	0	0	0	0	0	0	0	0	0	0	0	0	0	0	0	0	0	0	0	0	0	0
-57	0	0	0	0	0	0	0	0	0	0	0	0	0	0	0	0	0	0	0	0	0	0	0	0	0	0	0	0	0	0	0	0	0	0	0	0	0	0	0	0	0	0	0	0	0	0	0	0	0
-55	0	0	0	0	0	0	0	0	0	0	0	0	0	0	0	0	0	0	0	0	0	0	0	0	0	0	0	0	0	0	0	0	0	0	0	0	0	0	0	0	0	0	0	249.977	371.889	124.989	0	0	0
-53	0	0	0	0	0	0	0	0	0	0	0	0	0	0	0	0	0	0	0	0	0	0	0	0	0	0	0	0	0	0	0	0	0	0	0	0	0	0	0	0	0	0	371.78	445.633	368.92	0	0	0	0
-51	0	0	0	0	0	0	0	0	0	0	0	0	0	0	0	0	0	0	0	0	0	0	0	0	0	0	0	0	0	0	0	0	0	0	0	0	0	0	0	0	0	0	427.751	480.733	246.9	0	0	0	122.12
-49	0	0	0	0	0	0	0	0	0	0	0	0	0	0	0	0	0	0	0	0	0	0	0	0	0	0	0	0	0	0	0	0	0	0	0	0	0	0	0	0	0	124.689	433.955	478.827	489.962	124.689	0	0	0
-47	0	0	0	0	0	0	0	0	0	0	0	0	0	0	0	0	0	0	0	0	0	0	0	0	0	0	0	0	0	0	0	0	0	0	0	0	0	0	0	0	0	0	447.461	470.536	488.5	122.295	0	0	0
-45	0	0	0	0	0	0	0	0	0	0	0	0	0	0	0	0	0	0	0	0	0	0	0	0	0	0	0	0	0	0	0	0	0	0	0	0	0	0	0	0	0	0	433.174	485.086	477.044	249.055	0	0	0
-43	0	0	0	0	0	0	0	0	0	0	0	0	0	0	0	0	0	0	0	0	0	0	0	0	0	0	0	0	0	0	0	0	0	0	0	0	0	0	0	0	0	0	124.455	485.598	491.871	493.314	0	0	0
-41	0	0	0	0	0	0	0	0	0	0	0	0	0	0	0	0	0	0	0	0	0	0	0	0	0	0	0	0	0	0	0	0	0	0	0	0	0	0	0	0	0	0	246.9	473.517	488.992	492.357	248.773	0	0
-39	0	0	0	0	0	0	0	0	0	0	0	0	0	0	0	0	0	0	0	0	0	0	0	0	0	0	0	0	0	0	0	0	0	0	0	0	0	0	0	0	0	0	246.9	485.147	486.084	489.969	488.513	248.645	124.322
-37	0	0	0	0	0	0	0	0	0	0	0	0	0	0	0	0	0	0	0	0	0	0	0	0	0	0	0	0	0	0	0	0	0	0	0	0	0	0	0	0	0	0	122.638	488.499	491.877	493.8	491.398	490.9	486.065
-35	0	0	0	0	0	0	0	0	0	0	0	0	0	0	0	0	0	0	0	0	0	0	0	0	0	0	0	0	0	0	0	0	0	0	0	0	0	0	0	0	0	0	0	486.575	486.593	493.8	492.83	487.031	484.652
-33	0	0	0	0	0	0	0	0	0	0	0	0	0	0	0	0	0	0	0	0	0	0	0	0	0	0	0	0	0	0	0	0	0	0	0	0	0	0	0	0	0	0	0	246.9	488.956	492.836	490.427	481.753	475.999
-31	0	0	0	0	0	0	0	0	0	0	0	0	0	0	0	0	0	0	0	0	0	0	0	0	0	0	0	0	0	0	0	0	0	0	0	0	0	0	0	0	0	0	0	246.9	492.356	492.836	476.844	471.597	475.92
-29	0	0	0	0	0	0	0	0	0	0	0	0	0	0	0	0	0	0	0	0	0	0	0	0	0	0	0	0	0	0	0	0	0	0	0	0	0	0	0	0	0	0	0	246.9	493.315	488.978	484.146	479.813	448.918
-27	0	0	0	0	0	0	0	0	0	0	0	0	0	0	0	0	0	0	0	0	0	0	0	0	0	0	0	0	0	0	0	0	0	0	0	0	0	0	0	0	0	0	0	246.9	489.938	489.462	488.969	487.529	455.741
-25	0	0	0	0	0	0	0	0	0	0	0	0	0	0	0	0	0	0	0	0	0	0	0	0	0	0	0	0	0	0	0	0	0	0	0	0	0	0	0	0	0	0	0	0	492.836	489.462	482.691	483.191	472.11
-23	0	0	0	0	0	0	0	0	0	0	0	0	0	0	0	0	0	0	0	0	0	0	0	0	0	0	0	0	0	0	0	0	0	0	0	0	0	0	0	0	0	0	0	0	478.892	487.049	487.063	488.497	453.866
-21	0	0	0	0	0	0	0	0	0	0	0	0	0	0	0	0	0	0	0	0	0	0	0	0	0	0	0	0	0	0	0	0	0	0	0	0	0	0	0	0	0	0	0	0	493.319	489.462	492.355	491.39	463.405
-19	0	0	0	0	0	0	0	0	0	0	0	0	0	0	0	0	0	0	0	0	0	0	0	0	0	0	0	0	0	0	0	0	0	0	0	0	0	0	0	0	0	0	0	0	490.907	466.262	489.939	482.198	471.157
-17	0	0	0	0	0	0	0	0	0	0	0	0	0	0	0	0	0	0	0	0	0	0	0	0	0	0	0	0	0	0	0	0	0	0	0	0	0	0	0	0	0	0	0	370.679	462.881	490.907	482.216	489.461	453.756
-15	0	0	0	0	0	0	0	0	0	0	0	0	0	0	0	0	0	0	0	0	0	0	0	0	0	0	0	0	0	0	0	0	0	0	0	0	0	0	0	0	0	123.739	489.94	484.16	441.342	483.67	475.954	481.262	485.129
-13	0	0	0	0	0	0	0	0	0	0	0	0	0	0	0	0	0	0	0	0	0	0	0	0	0	0	0	0	0	0	0	0	0	0	0	0	0	0	0	0	0	246.9	486.077	482.219	485.112	468.243	464.851	473.089	488.495
-11	0	0	0	0	0	0	0	0	0	0	0	0	0	0	0	0	0	0	0	0	0	0	0	0	0	0	0	0	0	0	0	0	0	0	0	0	0	0	0	0	0	487.53	478.374	486.572	487.535	475.965	487.05	487.532	484.157
-9	0	0	0	0	0	0	0	0	0	0	0	0	0	0	0	0	0	0	0	0	0	0	0	0	0	0	0	0	0	0	0	0	0	0	0	0	0	0	0	0	246.9	484.634	478.85	487.532	481.263	477.883	478.845	484.156	485.117
-7	0	0	0	0	0	0	0	0	0	0	0	0	0	0	0	0	0	0	0	0	0	0	0	0	0	0	0	0	0	0	0	0	0	0	0	0	0	0	0	0	488.496	482.228	487.534	487.05	487.529	482.716	477.888	476.915	483.191
-5	0	0	0	0	0	0	0	0	0	0	0	0	0	0	0	0	0	0	0	0	0	0	0	0	0	0	0	0	0	0	0	0	0	0	0	0	0	0	0	246.9	486.564	476.435	471.615	486.081	484.635	487.531	470.17	469.203	474.022
-3	0	0	0	0	0	0	0	0	0	0	0	0	0	0	0	0	0	0	0	0	0	0	0	0	0	0	0	0	0	0	0	0	0	0	0	0	0	0	0	0	477.404	480.298	474.029	474.03	470.174	462.445	459.57	439.315	424.372
-1	0	0	0	0	0	0	0	0	0	0	0	0	0	0	0	0	0	0	0	0	0	0	0	0	0	0	0	0	0	0	0	0	0	0	0	0	0	0	0	123.431	467.762	472.099	477.404	481.744	482.71	474.029	448.467	449.437	485.602
1	0	0	0	0	0	0	0	0	0	0	0	0	0	0	0	0	0	0	0	0	0	0	0	0	0	0	0	0	0	0	0	0	0	0	0	0	0	0	0	0	370.369	485.12	486.084	489.46	479.333	481.744	489.46	481.262	489.942
3	0	0	0	0	0	0	0	0	0	0	0	0	0	0	0	0	0	0	0	0	0	0	0	0	0	0	0	0	0	0	0	0	0	0	0	0	0	0	0	0	123.507	487.532	486.083	484.637	478.853	478.37	487.532	478.853	481.264
5	0	0	0	0	0	0	0	0	0	0	0	0	0	0	0	0	0	0	0	0	0	0	0	0	0	0	0	0	0	0	0	0	0	0	0	0	0	0	0	0	0	485.6	482.225	481.745	480.779	486.565	483.193	487.049	478.851
7	0	0	0	0	0	0	0	0	0	0	0	0	0	0	0	0	0	0	0	0	0	0	0	0	0	0	0	0	0	0	0	0	0	0	0	0	0	0	0	123.318	0	478.377	479.817	484.156	469.686	467.773	474.995	485.115	370.482
9	0	0	0	0	0	0	0	0	0	0	0	0	0	0	0	0	0	0	0	0	0	0	0	0	0	0	0	0	0	0	0	0	0	0	0	0	0	0	246.9	247.241	246.9	370.521	451.365	397.955	485.119	486.086	478.842	370.521	0
11	0	0	0	0	0	0	0	0	0	0	0	0	0	0	0	0	0	0	0	0	0	0	0	0	0	0	0	0	0	0	0	0	0	0	0	0	0	246.9	246.9	0	0	0	247.319	370.559	370.559	123.659	123.659	0	0
13	0	0	0	0	0	0	0	0	0	0	0	0	0	0	0	0	0	0	0	0	0	0	0	0	0	0	0	0	0	0	0	0	0	0	0	0	246.403	473.036	246.9	0	0	0	0	0	0	0	0	0	0
15	0	0	0	0	0	0	0	0	0	0	0	0	0	0	0	0	0	0	0	0	0	0	0	0	0	0	0	0	0	0	0	0	0	0	123.161	486.075	478.385	476.921	246.9	0	0	0	0	0	0	0	0	0	0
17	0	0	0	0	0	0	0	0	0	0	0	0	0	0	0	0	0	0	0	0	0	0	0	0	0	0	0	0	0	0	0	123.121	370.021	478.878	481.288	476.928	246.9	0	0	0	0	0	0	0	0	0	0	0	0
19	0	0	0	0	0	0	0	0	0	123.079	0	0	0	0	0	0	0	0	0	0	0	0	0	0	0	0	0	0	0	0	369.979	484.164	487.049	370.721	0	370.721	486.562	0	0	0	0	0	0	483.657	123.821	0	0	0	0
21	0	0	0	0	0	0	0	0	0	0	0	0	0	0	0	0	0	0	0	0	0	0	0	0	0	0	0	0	0	0	478.814	483.178	491.39	0	0	0	370.764	0	0	0	123.037	247.727	0	0	0	0	0	0	0
23	0	0	0	0	0	0	0	0	0	0	0	0	0	0	0	0	0	0	0	0	0	0	0	0	0	0	0	0	0	246.9	491.871	493.32	488.006	0	0	0	0	0	123.907	247.815	123.907	0	0	0	0	0	0	0	0
25	0	0	0	0	0	0	0	0	0	0	0	0	0	0	0	0	0	0	0	0	0	0	0	0	0	0	0	246.9	122.948	492.836	493.8	493.8	491.391	0	0	0	0	0	0	122.948	0	0	0	0	0	0	0	0	0
27	0	0	0	0	0	0	0	0	0	0	0	0	0	0	0	0	0	0	0	0	0	0	0	0	0	0	245.802	123.999	489.466	492.84	493.8	493.32	490.902	0	0	0	0	0	0	469.693	0	0	0	0	0	0	0	0	0
29	0	0	0	0	0	0	0	0	0	0	0	0	0	0	0	0	0	0	0	0	0	0	0	0	0	0	246.9	369.753	493.315	492.836	493.8	492.84	492.831	369.753	0	122.853	122.853	0	122.853	246.9	0	0	0	0	0	0	0	0	0
31	0	0	0	0	0	0	0	0	0	0	0	0	0	0	0	0	0	0	0	0	0	0	0	0	0	246.9	122.803	489.937	492.351	493.8	492.361	493.32	489.457	490.917	478.374	465.796	488.498	484.635	474.91	246.9	0	0	0	0	0	0	0	0	0
33	0	0	0	0	0	0	0	0	0	0	0	0	0	0	0	0	0	0	0	0	0	0	0	0	0	479.372	488.493	489.964	493.8	490.918	493.315	493.8	489.942	482.722	478.385	485.12	490.427	486.558	492.361	477.895	122.75	0	0	0	0	0	0	0	0
35	0	0	0	0	0	0	0	0	0	0	0	0	0	0	0	0	0	0	0	0	0	0	0	122.696	489.936	493.315	488.984	491.859	493.315	492.35	490.918	490.924	492.35	484.664	484.658	480.256	487.534	481.209	482.724	481.268	490.907	122.696	0	0	0	0	0	0	0
37	0	0	0	0	0	0	0	0	0	0	0	0	0	0	0	0	0	0	0	0	0	0	0	369.538	482.737	493.8	484.098	486.122	489.961	488.026	488.978	491.871	487.005	488.473	487.496	491.379	478.381	486.557	489.438	491.865	482.68	246.9	0	0	0	0	0	0	0
39	0	0	0	0	0	0	0	0	0	0	0	0	0	0	0	0	0	0	0	0	0	0	246.9	475.448	483.191	493.8	493.8	490.421	486.077	487.521	488.957	490.9	491.864	489.956	484.648	480.749	492.836	489.922	489.443	489.47	492.357	471.139	0	0	0	0	0	0	0
41	0	0	0	0	0	0	0	0	0	0	0	0	0	0	0	0	0	0	0	0	0	0	246.9	478.877	489.92	493.321	477.028	475.925	490.907	490.421	490.907	489.964	490.907	490.914	493.321	487.041	487.557	463.164	452.621	423.414	492.828	485.127	369.413	122.513	0	0	0	0	0
43	0	0	0	0	0	0	0	0	0	0	0	0	0	0	0	0	0	0	0	0	0	0	371.355	484.594	488.037	489.001	488.476	489.456	490.428	490.883	492.828	491.377	484.665	488.507	491.409	486.1	423.434	265.625	450.015	302.861	326.582	400.366	468.787	369.345	0	0	0	0	0
45	0	0	0	0	0	0	0	0	0	0	0	0	0	0	0	0	0	0	0	0	0	0	246.9	489.003	490.907	489.909	493.8	486.017	493.314	492.836	492.341	475.056	484.659	471.215	463.441	483.216	462.35	182.334	229.76	170.575	446.517	439.195	449.401	467.726	450.459	369.273	369.273	122.373	0
47	0	0	0	0	0	0	0	0	0	0	0	0	0	0	0	0	0	0	0	0	0	0	246.9	488.031	478.937	491.411	488.067	491.366	489.483	476.981	485.634	463.542	477.864	462.901	426.838	356.857	247.614	155.63	399.95	438.745	436.42	421.115	432.138	468.742	469.139	480.334	124.605	124.605	0
49	0	0	0	0	0	0	0	0	0	0	0	0	0	0	0	0	0	0	0	0	0	122.211	481.827	476.966	479.82	477.901	481.233	485.12	484.613	486.065	469.982	478.311	489.923	470.692	342.475	340.736	314.26	369.401	469.105	469.669	448.755	427.933	426.395	413.137	464.038	249.379	0	0	246.9
51	0	0	0	0	0	0	0	0	0	0	0	0	0	0	0	0	0	0	0	0	0	464.742	476.896	477.425	468.683	481.241	485.11	482.175	485.618	483.71	469.917	453.832	378.782	373.804	394.472	394.845	427.957	459.526	479.385	477.913	473.899	423.789	400.808	443.192	433.631	459.059	457.534	450.192	244.239
53	0	0	0	0	0	0	0	0	0	0	0	0	0	0	0	0	0	0	0	122.02	368.92	460.61	486.617	476.362	481.716	480.797	466.807	471.174	471.606	466.475	463.991	381.249	207.659	389.859	374.863	395.56	376.524	433.494	463.515	124.88	246.9	439.437	388.704	384.031	424.482	419.314	426.11	439.191	435.248
55	0	0	0	0	0	0	0	243.823	0	0	0	0	0	0	0	0	0	0	121.911	368.811	480.31	473.486	474.843	482.215	480.346	463.166	458.223	448.266	441.828	392.761	374.689	356.311	408.7	353.322	380.755	431.19	445.361	435.072	249.977	0	249.977	427.549	399.06	380.971	430.574	402.117	401.02	455.126	249.977
57	0	0	0	0	0	0	0	0	250.218	121.791	121.791	0	0	0	0	0	0	121.791	407.942	417.651	484.631	484.156	485.081	484.605	487.023	474.498	473.482	469.226	434.272	426.046	409.339	385.578	419.641	446.464	469.585	250.218	125.109	0	0	0	0	246.9	351.303	414.239	426.366	414.369	442.926	246.9	0
59	0	0	0	0	0	0	0	243.314	243.314	410.438	246.9	121.657	0	0	0	0	87.441	218.143	367.132	479.389	477.978	480.368	473.113	467.453	467.523	469.2	465.915	389.708	377.006	429.588	399.577	416.07	408.607	435.207	125.243	0	0	0	0	0	125.243	351.62	362.803	406.161	250.486	250.486	372.143	0	0
61	0	0	0	0	0	121.507	406.069	446.265	480.727	484.171	429.835	319.994	301.821	222.694	324.657	141.916	280.083	474.021	476.808	481.247	477.803	484.125	477.833	469.047	457.504	365.752	308.59	414.897	420.729	396.345	369.587	395.016	380.822	399.542	121.507	0	0	0	0	0	0	403.514	428.13	372.293	0	0	0	0	0
63	0	0	0	0	0	0	251.129	372.464	474.56	484.613	482.75	481.736	481.687	471.485	480.314	487.032	480.314	474.935	481.246	483.615	488.504	485.202	471.127	460.176	429.22	425.798	409.281	373.448	411.364	409.138	423.505	353.431	363.924	391.684	384.949	242.671	0	121.336	246.9	0	0	125.564	0	242.671	368.236	368.236	0	0	0
65	0	121.14	368.04	121.14	0	242.279	368.04	368.04	480.699	468.923	480.334	480.789	477.386	484.611	480.442	483.628	487.031	487.067	486.594	484.173	476.656	465.101	442.171	291.624	382.515	426.765	438.19	401.794	383.239	421.849	441.138	416.987	389.224	393.356	417.031	425.472	436.879	368.04	372.66	0	0	251.521	372.66	373.352	432.346	125.76	242.279	0	0
67	483.171	485.179	251.976	125.988	0	125.988	120.912	440.474	466.577	475.967	483.683	480.179	470.141	460.06	465.514	478.508	477.603	481.401	454.241	458.845	468.566	412.631	365.584	292.525	363.545	455.829	420.577	453.412	448.411	442.311	432.25	440.851	437.409	445.752	443.629	454.611	443.704	445.657	431.761	120.912	0	241.824	125.988	349.911	418.724	172.02	271.507	125.988	0
69	126.257	0	0	0	0	126.257	373.157	484.692	486.556	480.385	473.295	475.629	473.481	478.665	479.18	473.711	373.157	252.513	418.912	418.255	476.604	463.42	459.77	480.166	252.513	373.157	241.287	241.287	367.543	458.937	241.287	120.644	246.9	126.257	438.498	373.157	252.513	126.257	463.168	126.257	0	367.543	459.573	460.362	335.904	0	0	0	0
71	120.321	0	0	0	0	0	0	0	253.158	253.158	253.158	126.579	0	0	0	0	0	0	0	0	0	0	120.321	120.321	120.321	424.25	458.555	457.993	451.687	437.636	253.158	0	0	126.579	373.479	0	367.221	433.675	461.375	451.296	437.373	470.134	249.849	52.4115	126.579	0	0	0	0
73	0	0	0	0	0	0	0	0	0	0	0	0	0	0	0	0	0	0	0	0	0	0	373.874	459.411	438.662	373.874	253.948	253.948	126.974	373.874	0	373.874	448.003	126.974	366.826	119.926	373.874	246.9	373.874	373.874	96.2223	51.5831	0	0	0	0	0	0	0
75	0	0	0	0	0	0	0	0	0	0	0	0	0	0	0	0	0	0	0	0	0	0	0	127.471	0	238.859	366.329	366.329	238.859	119.429	0	119.429	238.859	119.429	119.429	238.859	238.859	238.859	0	0	0	0	0	0	0	0	0	0	24.7256
77	0	0	0	0	0	0	0	0	0	0	0	0	0	0	0	0	0	0	0	0	0	0	0	104.595	256.233	128.116	128.116	118.784	128.116	0	128.116	0	256.233	128.116	128.116	256.233	128.116	390.706	493.8	291.046	19.0173	0	0	106.72	175.799	113.514	52.5478	30.5277	0
79	0	0	0	0	0	0	0	0	0	0	0	0	0	0	0	0	0	0	0	0	0	0	0	0	0	0	0	0	0	0	0	0	0	0	0	0	0	0	0	0	0	0	0	0	0	0	0	0	0
81	0	0	0	0	0	0	0	0	0	0	0	0	0	0	0	0	0	0	0	0	0	0	0	0	0	0	0	0	0	0	0	0	0	0	0	0	0	0	0	0	0	0	0	0	0	0	0	0	0
83	0	0	0	0	0	0	0	0	0	0	0	0	0	0	0	0	0	0	0	0	0	0	0	0	0	0	0	0	0	0	0	0	0	0	0	0	0	0	0	0	0	0	0	0	0	0	0	0	0
85	0	0	0	0	0	0	0	0	0	0	0	0	0	0	0	0	0	0	0	0	0	0	0	0	0	0	0	0	0	0	0	0	0	0	0	0	0	0	0	0	0	0	0	0	0	0	0	0	0
87	0	0	0	0	0	0	0	0	0	0	0	0	0	0	0	0	0	0	0	0	0	0	0	0	0	0	0	0	0	0	0	0	0	0	0	0	0	0	0	0	0	0	0	0	0	0	0	0	0
89	0	0	0	0	0	0	0	0	0	0	0	0	0	0	0	0	0	0	0	0	0	0	0	0	0	0	0	0	0	0	0	0	0	0	0	0	0	0	0	0	0	0	0	0	0	0	0	0	0
[truncated: 95 more columns]

## Sheet: wetlands
lat (degN) \ lon (degE)	-178.75	-176.25	-173.75	-171.25	-168.75	-166.25	-163.75	-161.25	-158.75	-156.25	-153.75	-151.25	-148.75	-146.25	-143.75	-141.25	-138.75	-136.25	-133.75	-131.25	-128.75	-126.25	-123.75	-121.25	-118.75	-116.25	-113.75	-111.25	-108.75	-106.25	-103.75	-101.25	-98.75	-96.25	-93.75	-91.25	-88.75	-86.25	-83.75	-81.25	-78.75	-76.25	-73.75	-71.25	-68.75	-66.25	-63.75	-61.25	-58.75
-89	0	0	0	0	0	0	0	0	0	0	0	0	0	0	0	0	0	0	0	0	0	0	0	0	0	0	0	0	0	0	0	0	0	0	0	0	0	0	0	0	0	0	0	0	0	0	0	0	0
-87	0	0	0	0	0	0	0	0	0	0	0	0	0	0	0	0	0	0	0	0	0	0	0	0	0	0	0	0	0	0	0	0	0	0	0	0	0	0	0	0	0	0	0	0	0	0	0	0	0
-85	0	0	0	0	0	0	0	0	0	0	0	0	0	0	0	0	0	0	0	0	0	0	0	0	0	0	0	0	0	0	0	0	0	0	0	0	0	0	0	0	0	0	0	0	0	0	0	0	0
-83	0	0	0	0	0	0	0	0	0	0	0	0	0	0	0	0	0	0	0	0	0	0	0	0	0	0	0	0	0	0	0	0	0	0	0	0	0	0	0	0	0	0	0	0	0	0	0	0	0
-81	0	0	0	0	0	0	0	0	0	0	0	0	0	0	0	0	0	0	0	0	0	0	0	0	0	0	0	0	0	0	0	0	0	0	0	0	0	0	0	0	0	0	0	0	0	0	0	0	0
-79	0	0	0	0	0	0	0	0	0	0	0	0	0	0	0	0	0	0	0	0	0	0	0	0	0	0	0	0	0	0	0	0	0	0	0	0	0	0	0	0	0	0	0	0	0	0	0	0	0
-77	0	0	0	0	0	0	0	0	0	0	0	0	0	0	0	0	0	0	0	0	0	0	0	0	0	0	0	0	0	0	0	0	0	0	0	0	0	0	0	0	0	0	0	0	0	0	0	0	0
-75	0	0	0	0	0	0	0	0	0	0	0	0	0	0	0	0	0	0	0	0	0	0	0	0	0	0	0	0	0	0	0	0	0	0	0	0	0	0	0	0	0	0	0	0	0	0	0	0	0
-73	0	0	0	0	0	0	0	0	0	0	0	0	0	0	0	0	0	0	0	0	0	0	0	0	0	0	0	0	0	0	0	0	0	0	0	0	0	0	0	0	0	0	0	0	0	0	0	0	0
-71	0	0	0	0	0	0	0	0	0	0	0	0	0	0	0	0	0	0	0	0	0	0	0	0	0	0	0	0	0	0	0	0	0	0	0	0	0	0	0	0	0	0	0	0	0	0	0	0	0
-69	0	0	0	0	0	0	0	0	0	0	0	0	0	0	0	0	0	0	0	0	0	0	0	0	0	0	0	0	0	0	0	0	0	0	0	0	0	0	0	0	0	0	0	0	0	0	0	0	0
-67	0	0	0	0	0	0	0	0	0	0	0	0	0	0	0	0	0	0	0	0	0	0	0	0	0	0	0	0	0	0	0	0	0	0	0	0	0	0	0	0	0	0	0	0	0	0	0	0	0
-65	0	0	0	0	0	0	0	0	0	0	0	0	0	0	0	0	0	0	0	0	0	0	0	0	0	0	0	0	0	0	0	0	0	0	0	0	0	0	0	0	0	0	0	0	0	0	0	0	0
-63	0	0	0	0	0	0	0	0	0	0	0	0	0	0	0	0	0	0	0	0	0	0	0	0	0	0	0	0	0	0	0	0	0	0	0	0	0	0	0	0	0	0	0	0	0	0	0	0	0
-61	0	0	0	0	0	0	0	0	0	0	0	0	0	0	0	0	0	0	0	0	0	0	0	0	0	0	0	0	0	0	0	0	0	0	0	0	0	0	0	0	0	0	0	0	0	0	0	0	0
-59	0	0	0	0	0	0	0	0	0	0	0	0	0	0	0	0	0	0	0	0	0	0	0	0	0	0	0	0	0	0	0	0	0	0	0	0	0	0	0	0	0	0	0	0	0	0	0	0	0
-57	0	0	0	0	0	0	0	0	0	0	0	0	0	0	0	0	0	0	0	0	0	0	0	0	0	0	0	0	0	0	0	0	0	0	0	0	0	0	0	0	0	0	0	0	0	0	0	0	0
-55	0	0	0	0	0	0	0	0	0	0	0	0	0	0	0	0	0	0	0	0	0	0	0	0	0	0	0	0	0	0	0	0	0	0	0	0	0	0	0	0	0	0	0	0	0	0	0	0	0
-53	0	0	0	0	0	0	0	0	0	0	0	0	0	0	0	0	0	0	0	0	0	0	0	0	0	0	0	0	0	0	0	0	0	0	0	0	0	0	0	0	0	0	0	0	0	0	0	0	0
-51	0	0	0	0	0	0	0	0	0	0	0	0	0	0	0	0	0	0	0	0	0	0	0	0	0	0	0	0	0	0	0	0	0	0	0	0	0	0	0	0	0	0	0	0	0	0	0	0	0
-49	0	0	0	0	0	0	0	0	0	0	0	0	0	0	0	0	0	0	0	0	0	0	0	0	0	0	0	0	0	0	0	0	0	0	0	0	0	0	0	0	0	0	0	0	0	0	0	0	0
-47	0	0	0	0	0	0	0	0	0	0	0	0	0	0	0	0	0	0	0	0	0	0	0	0	0	0	0	0	0	0	0	0	0	0	0	0	0	0	0	0	0	0	0	1938.93	2098.82	477.02	0	0	0
-45	0	0	0	0	0	0	0	0	0	0	0	0	0	0	0	0	0	0	0	0	0	0	0	0	0	0	0	0	0	0	0	0	0	0	0	0	0	0	0	0	0	0	0	0	0	0	0	0	0
-43	0	0	0	0	0	0	0	0	0	0	0	0	0	0	0	0	0	0	0	0	0	0	0	0	0	0	0	0	0	0	0	0	0	0	0	0	0	0	0	0	0	0	0	0	0	0	0	0	0
-41	0	0	0	0	0	0	0	0	0	0	0	0	0	0	0	0	0	0	0	0	0	0	0	0	0	0	0	0	0	0	0	0	0	0	0	0	0	0	0	0	0	0	0	0	0	294.257	0	0	0
-39	0	0	0	0	0	0	0	0	0	0	0	0	0	0	0	0	0	0	0	0	0	0	0	0	0	0	0	0	0	0	0	0	0	0	0	0	0	0	0	0	0	0	0	0	809.061	3594.27	1829.9	941.829	0
-37	0	0	0	0	0	0	0	0	0	0	0	0	0	0	0	0	0	0	0	0	0	0	0	0	0	0	0	0	0	0	0	0	0	0	0	0	0	0	0	0	0	0	0	0	1622.41	4867.25	5935.45	11883.5	8759.57
-35	0	0	0	0	0	0	0	0	0	0	0	0	0	0	0	0	0	0	0	0	0	0	0	0	0	0	0	0	0	0	0	0	0	0	0	0	0	0	0	0	0	0	0	0	717.853	717.853	9418.59	8163.39	14839.6
-33	0	0	0	0	0	0	0	0	0	0	0	0	0	0	0	0	0	0	0	0	0	0	0	0	0	0	0	0	0	0	0	0	0	0	0	0	0	0	0	0	0	0	0	0	293.689	130.531	3556.71	75556.5	115127
-31	0	0	0	0	0	0	0	0	0	0	0	0	0	0	0	0	0	0	0	0	0	0	0	0	0	0	0	0	0	0	0	0	0	0	0	0	0	0	0	0	0	0	0	0	0	0	1045.42	23723.7	45557.6
-29	0	0	0	0	0	0	0	0	0	0	0	0	0	0	0	0	0	0	0	0	0	0	0	0	0	0	0	0	0	0	0	0	0	0	0	0	0	0	0	0	0	0	0	0	0	0	2263.17	18585.3	181554
-27	0	0	0	0	0	0	0	0	0	0	0	0	0	0	0	0	0	0	0	0	0	0	0	0	0	0	0	0	0	0	0	0	0	0	0	0	0	0	0	0	0	0	0	0	0	0	649.014	4746.92	44588.7
-25	0	0	0	0	0	0	0	0	0	0	0	0	0	0	0	0	0	0	0	0	0	0	0	0	0	0	0	0	0	0	0	0	0	0	0	0	0	0	0	0	0	0	0	0	0	0	3499.74	1830.89	14909.6
-23	0	0	0	0	0	0	0	0	0	0	0	0	0	0	0	0	0	0	0	0	0	0	0	0	0	0	0	0	0	0	0	0	0	0	0	0	0	0	0	0	0	0	0	0	0	0	4382.15	10060.1	24804.3
-21	0	0	0	0	0	0	0	0	0	0	0	0	0	0	0	0	0	0	0	0	0	0	0	0	0	0	0	0	0	0	0	0	0	0	0	0	0	0	0	0	0	0	0	0	0	0	1623.31	4042.08	6306.65
-19	0	0	0	0	0	0	0	0	0	0	0	0	0	0	0	0	0	0	0	0	0	0	0	0	0	0	0	0	0	0	0	0	0	0	0	0	0	0	0	0	0	0	0	0	691.522	691.522	0	0	3526.65
-17	0	0	0	0	0	0	0	0	0	0	0	0	0	0	0	0	0	0	0	0	0	0	0	0	0	0	0	0	0	0	0	0	0	0	0	0	0	0	0	0	0	0	0	0	824.316	1791.12	3803.78	9259.49	32415.5
-15	0	0	0	0	0	0	0	0	0	0	0	0	0	0	0	0	0	0	0	0	0	0	0	0	0	0	0	0	0	0	0	0	0	0	0	0	0	0	0	0	0	0	0	0	0	521.86	7217.89	7485.31	3306.33
-13	0	0	0	0	0	0	0	0	0	0	0	0	0	0	0	0	0	0	0	0	0	0	0	0	0	0	0	0	0	0	0	0	0	0	0	0	0	0	0	0	0	0	0	0	3088.51	6538.65	22006.4	35347.1	0
-11	0	0	0	0	0	0	0	0	0	0	0	0	0	0	0	0	0	0	0	0	0	0	0	0	0	0	0	0	0	0	0	0	0	0	0	0	0	0	0	0	0	0	0	0	0	602.389	803.136	0	0
-9	0	0	0	0	0	0	0	0	0	0	0	0	0	0	0	0	0	0	0	0	0	0	0	0	0	0	0	0	0	0	0	0	0	0	0	0	0	0	0	0	0	0	21818	0	0	0	0	0	0
-7	0	0	0	0	0	0	0	0	0	0	0	0	0	0	0	0	0	0	0	0	0	0	0	0	0	0	0	0	0	0	0	0	0	0	0	0	0	0	0	0	0	23990.6	10012.2	0	0	0	561.841	561.841	0
-5	0	0	0	0	0	0	0	0	0	0	0	0	0	0	0	0	0	0	0	0	0	0	0	0	0	0	0	0	0	0	0	0	0	0	0	0	0	0	0	0	0	7764.9	74999.1	0	13956.8	13956.8	2666.75	1824.08	1123.34
-3	0	0	0	0	0	0	0	0	0	0	0	0	0	0	0	0	0	0	0	0	0	0	0	0	0	0	0	0	0	0	0	0	0	0	0	0	0	0	0	0	0	0	0	0	1093.32	5466.58	3725.99	9216.5	40196.8
-1	0	0	0	0	0	0	0	0	0	0	0	0	0	0	0	0	0	0	0	0	0	0	0	0	0	0	0	0	0	0	0	0	0	0	0	0	0	0	0	0	442.526	0	0	0	0	0	11867.5	6353.28	8231.59
1	0	0	0	0	0	0	0	0	0	0	0	0	0	0	0	0	0	0	0	0	0	0	0	0	0	0	0	0	0	0	0	0	0	0	0	0	0	0	0	0	0	0	0	0	0	5296.06	0	0	0
3	0	0	0	0	0	0	0	0	0	0	0	0	0	0	0	0	0	0	0	0	0	0	0	0	0	0	0	0	0	0	0	0	0	0	0	0	0	0	0	0	0	0	0	0	0	0	0	0	0
5	0	0	0	0	0	0	0	0	0	0	0	0	0	0	0	0	0	0	0	0	0	0	0	0	0	0	0	0	0	0	0	0	0	0	0	0	0	0	0	0	0	0	0	0	7894.12	7894.12	0	0	2486.49
7	0	0	0	0	0	0	0	0	0	0	0	0	0	0	0	0	0	0	0	0	0	0	0	0	0	0	0	0	0	0	0	0	0	0	0	0	0	0	0	2200.74	3144.05	13837.2	0	0	15944.8	9672.62	0	0	0
9	0	0	0	0	0	0	0	0	0	0	0	0	0	0	0	0	0	0	0	0	0	0	0	0	0	0	0	0	0	0	0	0	0	0	0	0	0	0	0	315.038	0	315.038	7671.2	641.556	13841.7	186.116	8107.83	66379.6	0
11	0	0	0	0	0	0	0	0	0	0	0	0	0	0	0	0	0	0	0	0	0	0	0	0	0	0	0	0	0	0	0	0	0	0	0	0	0	502.524	3872.94	0	0	1014.39	0	75.7657	0	0	434.475	2726.6	0
13	0	0	0	0	0	0	0	0	0	0	0	0	0	0	0	0	0	0	0	0	0	0	0	0	0	0	0	0	0	0	0	0	0	0	0	0	0	0	4806.91	0	0	0	0	0	0	0	0	0	0
15	0	0	0	0	0	0	0	0	0	0	0	0	0	0	0	0	0	0	0	0	0	0	0	0	0	0	0	0	0	0	0	0	0	0	183.647	183.647	2385.55	1781.18	8876.71	0	0	0	0	0	0	0	0	0	0
17	0	0	0	0	0	0	0	0	0	0	0	0	0	0	0	0	0	0	0	0	0	0	0	0	0	0	0	0	0	0	0	0	0	0	918.956	19479.7	10355.1	0	0	0	0	0	0	0	0	0	0	0	0
19	0	0	0	0	0	0	0	0	0	0	0	0	0	0	0	0	0	0	0	0	0	0	0	0	0	0	0	0	0	0	0	0	0	5381.86	3342.43	2109.41	7987.56	1099.34	0	0	0	0	52.5129	52.5129	0	0	0	0	0
21	0	0	0	0	0	0	0	0	0	0	0	0	0	0	0	0	0	0	0	0	0	0	0	0	0	0	0	0	0	0	0	0	156.179	156.179	0	5053.55	297.28	297.28	0	0	823.967	330.312	0	0	0	0	0	0	0
23	0	0	0	0	0	0	0	0	0	0	0	0	0	0	0	0	0	0	0	0	0	0	0	0	0	0	0	0	0	0	0	0	943.856	0	0	0	0	0	244.75	8570.08	0	0	0	0	0	0	0	0	0
25	0	0	0	0	0	0	0	0	0	0	0	0	0	0	0	0	0	0	0	0	0	0	0	0	0	0	0	0	0	0	0	0	0	0	0	0	0	0	0	14094.7	0	0	0	0	0	0	0	0	0
27	0	0	0	0	0	0	0	0	0	0	0	0	0	0	0	0	0	0	0	0	0	0	0	0	0	0	0	0	0	0	0	0	359.197	359.197	0	0	0	0	1828.39	54427.5	0	0	0	0	0	0	0	0	0
29	0	0	0	0	0	0	0	0	0	0	0	0	0	0	0	0	0	0	0	0	0	0	0	0	0	0	0	0	0	0	0	0	0	0	6919.08	10799.9	0	0	3235.32	9409.09	0	0	0	0	0	0	0	0	0
31	0	0	0	0	0	0	0	0	0	0	0	0	0	0	0	0	0	0	0	0	0	0	0	0	0	95.254	666.749	0	0	0	64.0023	0	0	0	0	8658.08	0	6423.78	9535.09	11768.5	0	0	0	0	0	0	0	0	0
33	0	0	0	0	0	0	0	0	0	0	0	0	0	0	0	0	0	0	0	0	0	0	0	0	0	0	92.1713	92.1713	0	0	64.7043	0	0	0	322.552	18154.1	906.611	46.7484	0	20682.9	2820.69	0	0	0	0	0	0	0	0
35	0	0	0	0	0	0	0	0	0	0	0	0	0	0	0	0	0	0	0	0	0	0	0	0	0	0	0	0	0	0	0	0	0	271.048	0	13194.9	810.708	0	0	0	9224.32	12338.8	0	0	0	0	0	0	0
37	0	0	0	0	0	0	0	0	0	0	0	0	0	0	0	0	0	0	0	0	0	0	0	275.7	0	0	0	0	0	0	0	0	0	0	0	5447.48	5447.48	0	0	0	0	2334.63	0	0	0	0	0	0	0
39	0	0	0	0	0	0	0	0	0	0	0	0	0	0	0	0	0	0	0	0	0	0	137.917	197.246	816.068	0	420.103	305.591	0	0	0	0	0	0	0	0	0	0	0	0	0	1569.9	0	0	0	0	0	0	0
41	0	0	0	0	0	0	0	0	0	0	0	0	0	0	0	0	0	0	0	0	0	0	0	0	0	0	0	0	0	0	0	0	0	0	0	0	0	0	0	0	0	0	0	0	0	0	0	0	0
43	0	0	0	0	0	0	0	0	0	0	0	0	0	0	0	0	0	0	0	0	0	0	0	228.509	0	0	0	0	0	0	0	44234.1	0	0	0	0	433.62	4217.99	2011.4	0	0	0	0	0	0	0	0	0	0
45	0	0	0	0	0	0	0	0	0	0	0	0	0	0	0	0	0	0	0	0	0	0	0	0	0	0	0	0	0	0	0	0	0	0	763.499	13247.3	14029.4	2549.2	4245.92	349.849	0	807.514	410.849	0	0	327.589	0	0	0
47	0	0	0	0	0	0	0	0	0	0	0	0	0	0	0	0	0	0	0	0	0	0	0	0	0	0	0	0	0	0	0	0	7931.65	10855.3	13800.1	13674.3	24529.4	14966	0	0	0	0	0	440.102	0	0	0	0	0
49	0	0	0	0	0	0	0	0	0	0	0	0	0	0	0	0	0	0	0	0	0	0	0	0	0	0	0	0	0	0	0	0	1636.26	16114.7	8017.34	0	0	0	0	2500.21	7798.41	722.855	0	0	0	0	0	0	1559.81
51	0	0	0	0	0	0	0	0	0	0	0	0	0	0	0	0	0	0	0	0	0	0	0	0	0	0	457.088	0	0	0	0	3584.56	9765.49	7020.45	7994.72	7507.32	2918.5	10190.1	18048.8	16020.8	17250.9	3125.06	2583.93	0	0	0	0	3632.82	0
53	0	0	0	0	0	0	0	0	0	0	0	0	0	0	0	0	0	0	277.511	277.511	0	506.26	0	0	0	2290.93	922.09	0	0	0	9947.01	11480.4	7809.12	27871.8	10457.8	9660.51	15609.8	17683.9	16634.9	3079.39	0	0	0	0	0	10373.7	5255.27	0	3560.49
55	0	0	0	0	0	0	0	0	0	0	0	0	0	0	0	0	0	0	0	0	0	0	0	0	0	1345.57	2370.51	2370.51	12353.6	2465.82	1979.53	11665.8	12531.9	10599.1	9525.06	11232.6	14285.7	11329.9	5368.49	632.665	0	0	0	0	0	0	5247.91	0	0
57	0	0	0	0	0	0	0	0	8992.52	2899.38	398.349	0	0	0	0	0	0	0	0	443.815	0	0	0	3450.46	2146.1	0	4452.05	4591.17	10649	10121.9	3958.24	0	1004.38	5830.56	10630.1	9965.02	8645.77	0	0	0	0	0	0	0	0	0	0	0	0
59	0	0	0	0	0	0	0	1907.04	516.784	8188.21	730.661	0	0	0	0	0	0	728.684	0	0	0	0	1411.38	30702.6	10296.1	4104.62	8266.12	8634.77	12280.9	13562.8	11401.1	2847.41	1347.41	9097.96	7855.62	0	0	0	0	0	0	0	0	0	0	0	0	0	0
61	0	0	0	0	0	1263.91	7175.96	4359.25	3292.8	4423.44	914.167	2107.56	804.257	381.519	945.314	187.373	0	0	0	0	0	0	1716.73	12727.1	4794.92	2040.59	6767.47	2288.55	0	0	0	0	0	0	0	0	0	0	0	0	0	0	0	0	0	0	0	0	0
63	0	0	0	0	0	0	2719.78	597.971	8902.32	1345.12	182.693	2370.92	2420.1	2012.44	2015.95	3054.44	0	0	0	0	0	0	0	10994.6	9258.76	3140.3	1353.54	0	0	0	0	0	0	0	0	0	0	0	0	0	0	0	0	0	0	0	0	0	0
65	383.72	2224.08	1482.18	1490.92	0	570.542	1497.71	596.65	2391.04	5773.55	3610.99	1621.58	1656.15	561.042	2171.69	0	0	0	0	0	0	0	0	0	0	0	0	0	0	0	0	0	0	0	0	0	0	0	0	0	0	0	2747.52	4638.46	1870.57	0	0	0	0
67	1359.69	709.144	1436.43	479.642	0	0	3016.24	3084.53	5482.78	3298.91	1078.43	1895.97	3821.24	10539.7	8950.37	564.073	1155.2	0	4066.66	373.247	0	0	0	0	0	0	0	0	0	0	0	0	0	0	0	0	0	0	0	0	0	0	992.356	998.088	0	0	0	0	0
69	749.029	0	0	0	0	1066.21	2010.76	2443.96	4584.22	2677	5305.31	7306.84	4440.06	2105.44	1624.67	2004.88	1325.78	2825.35	8203.83	5739.14	2717.63	0	0	0	0	0	0	0	0	0	0	0	0	0	0	0	0	0	0	0	0	0	0	0	0	0	0	0	0
71	0	0	0	0	0	0	0	0	5937.29	8483.47	4787.88	2312.23	1830.88	0	0	0	0	0	0	0	0	0	0	0	0	0	0	0	0	0	0	0	0	0	0	0	0	0	0	0	0	0	0	0	0	0	0	0	0
73	0	0	0	0	0	0	0	0	0	0	0	0	0	0	0	0	0	0	0	0	0	0	0	0	0	0	0	0	0	0	0	0	0	0	0	0	0	0	0	0	0	0	0	0	0	0	0	0	0
75	0	0	0	0	0	0	0	0	0	0	0	0	0	0	0	0	0	0	0	0	0	0	0	0	0	0	0	0	0	0	0	0	0	0	0	0	0	0	0	0	0	0	0	0	0	0	0	0	0
77	0	0	0	0	0	0	0	0	0	0	0	0	0	0	0	0	0	0	0	0	0	0	0	0	0	0	0	0	0	0	0	0	0	0	0	0	0	0	0	0	0	0	0	0	0	0	0	0	0
79	0	0	0	0	0	0	0	0	0	0	0	0	0	0	0	0	0	0	0	0	0	0	0	0	0	0	0	0	0	0	0	0	0	0	0	0	0	0	0	0	0	0	0	0	0	0	0	0	0
81	0	0	0	0	0	0	0	0	0	0	0	0	0	0	0	0	0	0	0	0	0	0	0	0	0	0	0	0	0	0	0	0	0	0	0	0	0	0	0	0	0	0	0	0	0	0	0	0	0
83	0	0	0	0	0	0	0	0	0	0	0	0	0	0	0	0	0	0	0	0	0	0	0	0	0	0	0	0	0	0	0	0	0	0	0	0	0	0	0	0	0	0	0	0	0	0	0	0	0
85	0	0	0	0	0	0	0	0	0	0	0	0	0	0	0	0	0	0	0	0	0	0	0	0	0	0	0	0	0	0	0	0	0	0	0	0	0	0	0	0	0	0	0	0	0	0	0	0	0
87	0	0	0	0	0	0	0	0	0	0	0	0	0	0	0	0	0	0	0	0	0	0	0	0	0	0	0	0	0	0	0	0	0	0	0	0	0	0	0	0	0	0	0	0	0	0	0	0	0
89	0	0	0	0	0	0	0	0	0	0	0	0	0	0	0	0	0	0	0	0	0	0	0	0	0	0	0	0	0	0	0	0	0	0	0	0	0	0	0	0	0	0	0	0	0	0	0	0	0
[truncated: 95 more columns]

## Sheet: soil sink
lat (degN) \ lon (degE)	-178.75	-176.25	-173.75	-171.25	-168.75	-166.25	-163.75	-161.25	-158.75	-156.25	-153.75	-151.25	-148.75	-146.25	-143.75	-141.25	-138.75	-136.25	-133.75	-131.25	-128.75	-126.25	-123.75	-121.25	-118.75	-116.25	-113.75	-111.25	-108.75	-106.25	-103.75	-101.25	-98.75	-96.25	-93.75	-91.25	-88.75	-86.25	-83.75	-81.25	-78.75	-76.25	-73.75	-71.25	-68.75	-66.25	-63.75	-61.25	-58.75
-89	0	0	0	0	0	0	0	0	0	0	0	0	0	0	0	0	0	0	0	0	0	0	0	0	0	0	0	0	0	0	0	0	0	0	0	0	0	0	0	0	0	0	0	0	0	0	0	0	0
-87	0	0	0	0	0	0	0	0	0	0	0	0	0	0	0	0	0	0	0	0	0	0	0	0	0	0	0	0	0	0	0	0	0	0	0	0	0	0	0	0	0	0	0	0	0	0	0	0	0
-85	0	0	0	0	0	0	0	0	0	0	0	0	0	0	0	0	0	0	0	0	0	0	0	0	0	0	0	0	0	0	0	0	0	0	0	0	0	0	0	0	0	0	0	0	0	0	0	0	0
-83	0	0	0	0	0	0	0	0	0	0	0	0	0	0	0	0	0	0	0	0	0	0	0	0	0	0	0	0	0	0	0	0	0	0	0	0	0	0	0	0	0	0	0	0	0	0	0	0	0
-81	0	0	0	0	0	0	0	0	0	0	0	0	0	0	0	0	0	0	0	0	0	0	0	0	0	0	0	0	0	0	0	0	0	0	0	0	0	0	0	0	0	0	0	0	0	0	0	0	0
-79	0	0	0	0	0	0	0	0	0	0	0	0	0	0	0	0	0	0	0	0	0	0	0	0	0	0	0	0	0	0	0	0	0	0	0	0	0	0	0	0	0	0	0	0	0	0	0	0	0
-77	0	0	0	0	0	0	0	0	0	0	0	0	0	0	0	0	0	0	0	0	0	0	0	0	0	0	0	0	0	0	0	0	0	0	0	0	0	0	0	0	0	0	0	0	0	0	0	0	0
-75	0	0	0	0	0	0	0	0	0	0	0	0	0	0	0	0	0	0	0	0	0	0	0	0	0	0	0	0	0	0	0	0	0	0	0	0	0	0	0	0	0	0	0	0	0	0	0	0	0
-73	0	0	0	0	0	0	0	0	0	0	0	0	0	0	0	0	0	0	0	0	0	0	0	0	0	0	0	0	0	0	0	0	0	0	0	0	0	0	0	0	0	0	0	0	0	0	0	0	0
-71	0	0	0	0	0	0	0	0	0	0	0	0	0	0	0	0	0	0	0	0	0	0	0	0	0	0	0	0	0	0	0	0	0	0	0	0	0	0	0	0	0	0	0	0	0	0	0	0	0
-69	0	0	0	0	0	0	0	0	0	0	0	0	0	0	0	0	0	0	0	0	0	0	0	0	0	0	0	0	0	0	0	0	0	0	0	0	0	0	0	0	0	0	0	0	0	0	0	0	0
-67	0	0	0	0	0	0	0	0	0	0	0	0	0	0	0	0	0	0	0	0	0	0	0	0	0	0	0	0	0	0	0	0	0	0	0	0	0	0	0	0	0	0	0	0	0	0	0	0	0
-65	0	0	0	0	0	0	0	0	0	0	0	0	0	0	0	0	0	0	0	0	0	0	0	0	0	0	0	0	0	0	0	0	0	0	0	0	0	0	0	0	0	0	0	0	0	0	0	0	0
-63	0	0	0	0	0	0	0	0	0	0	0	0	0	0	0	0	0	0	0	0	0	0	0	0	0	0	0	0	0	0	0	0	0	0	0	0	0	0	0	0	0	0	0	0	0	0	0	0	0
-61	0	0	0	0	0	0	0	0	0	0	0	0	0	0	0	0	0	0	0	0	0	0	0	0	0	0	0	0	0	0	0	0	0	0	0	0	0	0	0	0	0	0	0	0	0	0	0	0	0
-59	0	0	0	0	0	0	0	0	0	0	0	0	0	0	0	0	0	0	0	0	0	0	0	0	0	0	0	0	0	0	0	0	0	0	0	0	0	0	0	0	0	0	0	0	0	0	0	0	0
-57	0	0	0	0	0	0	0	0	0	0	0	0	0	0	0	0	0	0	0	0	0	0	0	0	0	0	0	0	0	0	0	0	0	0	0	0	0	0	0	0	0	0	0	0	0	0	0	0	0
-55	0	0	0	0	0	0	0	0	0	0	0	0	0	0	0	0	0	0	0	0	0	0	0	0	0	0	0	0	0	0	0	0	0	0	0	0	0	0	0	0	0	0	0	153.333	1916.66	1150	0	0	0
-53	0	0	0	0	0	0	0	0	0	0	0	0	0	0	0	0	0	0	0	0	0	0	0	0	0	0	0	0	0	0	0	0	0	0	0	0	0	0	0	0	0	0	1523.23	1812.09	452.584	0	0	0	0
-51	0	0	0	0	0	0	0	0	0	0	0	0	0	0	0	0	0	0	0	0	0	0	0	0	0	0	0	0	0	0	0	0	0	0	0	0	0	0	0	0	0	0	2271.69	1056.86	149.814	0	0	0	149.814
-49	0	0	0	0	0	0	0	0	0	0	0	0	0	0	0	0	0	0	0	0	0	0	0	0	0	0	0	0	0	0	0	0	0	0	0	0	0	0	0	0	0	0	1896.88	382.417	0	0	0	0	0
-47	0	0	0	0	0	0	0	0	0	0	0	0	0	0	0	0	0	0	0	0	0	0	0	0	0	0	0	0	0	0	0	0	0	0	0	0	0	0	0	0	0	0	3036	757.23	0	0	0	0	0
-45	0	0	0	0	0	0	0	0	0	0	0	0	0	0	0	0	0	0	0	0	0	0	0	0	0	0	0	0	0	0	0	0	0	0	0	0	0	0	0	0	0	0	1507.85	2271.69	0	0	0	0	0
-43	0	0	0	0	0	0	0	0	0	0	0	0	0	0	0	0	0	0	0	0	0	0	0	0	0	0	0	0	0	0	0	0	0	0	0	0	0	0	0	0	0	0	1520.62	2271.69	0	0	0	0	0
-41	0	0	0	0	0	0	0	0	0	0	0	0	0	0	0	0	0	0	0	0	0	0	0	0	0	0	0	0	0	0	0	0	0	0	0	0	0	0	0	0	0	0	2271.69	2271.69	0	0	0	0	0
-39	0	0	0	0	0	0	0	0	0	0	0	0	0	0	0	0	0	0	0	0	0	0	0	0	0	0	0	0	0	0	0	0	0	0	0	0	0	0	0	0	0	0	1519.81	757.23	0	0	76.2581	381.29	305.031
-37	0	0	0	0	0	0	0	0	0	0	0	0	0	0	0	0	0	0	0	0	0	0	0	0	0	0	0	0	0	0	0	0	0	0	0	0	0	0	0	0	0	0	752.25	1666.9	0	0	303.888	757.23	757.23
-35	0	0	0	0	0	0	0	0	0	0	0	0	0	0	0	0	0	0	0	0	0	0	0	0	0	0	0	0	0	0	0	0	0	0	0	0	0	0	0	0	0	0	0	0	152.372	0	604.857	757.23	757.23
-33	0	0	0	0	0	0	0	0	0	0	0	0	0	0	0	0	0	0	0	0	0	0	0	0	0	0	0	0	0	0	0	0	0	0	0	0	0	0	0	0	0	0	0	152.305	302.892	0	454.338	757.23	456.056
-31	0	0	0	0	0	0	0	0	0	0	0	0	0	0	0	0	0	0	0	0	0	0	0	0	0	0	0	0	0	0	0	0	0	0	0	0	0	0	0	0	0	0	0	302.892	302.892	0	608.964	150.651	604.992
-29	0	0	0	0	0	0	0	0	0	0	0	0	0	0	0	0	0	0	0	0	0	0	0	0	0	0	0	0	0	0	0	0	0	0	0	0	0	0	0	0	0	0	0	0	302.892	0	302.892	0	0
-27	0	0	0	0	0	0	0	0	0	0	0	0	0	0	0	0	0	0	0	0	0	0	0	0	0	0	0	0	0	0	0	0	0	0	0	0	0	0	0	0	0	0	0	0	757.23	454.338	0	150.772	0
-25	0	0	0	0	0	0	0	0	0	0	0	0	0	0	0	0	0	0	0	0	0	0	0	0	0	0	0	0	0	0	0	0	0	0	0	0	0	0	0	0	0	0	0	0	757.23	757.23	0	0	75.416
-23	0	0	0	0	0	0	0	0	0	0	0	0	0	0	0	0	0	0	0	0	0	0	0	0	0	0	0	0	0	0	0	0	0	0	0	0	0	0	0	0	0	0	0	0	454.338	757.23	150.885	0	0
-21	0	0	0	0	0	0	0	0	0	0	0	0	0	0	0	0	0	0	0	0	0	0	0	0	0	0	0	0	0	0	0	0	0	0	0	0	0	0	0	0	0	0	0	0	454.338	605.277	151.953	0	227.933
-19	0	0	0	0	0	0	0	0	0	0	0	0	0	0	0	0	0	0	0	0	0	0	0	0	0	0	0	0	0	0	0	0	0	0	0	0	0	0	0	0	0	0	0	0	757.23	757.23	754.956	0	454.344
-17	0	0	0	0	0	0	0	0	0	0	0	0	0	0	0	0	0	0	0	0	0	0	0	0	0	0	0	0	0	0	0	0	0	0	0	0	0	0	0	0	0	0	0	605.784	681.305	377.605	983.793	530.667	1667.52
-15	0	0	0	0	0	0	0	0	0	0	0	0	0	0	0	0	0	0	0	0	0	0	0	0	0	0	0	0	0	0	0	0	0	0	0	0	0	0	0	0	0	0	606.137	757.23	453.984	302.892	530.237	833.13	2271.69
-13	0	0	0	0	0	0	0	0	0	0	0	0	0	0	0	0	0	0	0	0	0	0	0	0	0	0	0	0	0	0	0	0	0	0	0	0	0	0	0	0	0	454.643	378.463	377.855	75.5709	226.713	0	910.5	2271.69
-11	0	0	0	0	0	0	0	0	0	0	0	0	0	0	0	0	0	0	0	0	0	0	0	0	0	0	0	0	0	0	0	0	0	0	0	0	0	0	0	0	75.8526	529.933	0	0	0	0	1135.46	226.784	908.673
-9	0	0	0	0	0	0	0	0	0	0	0	0	0	0	0	0	0	0	0	0	0	0	0	0	0	0	0	0	0	0	0	0	0	0	0	0	0	0	0	0	303.103	302.682	0	0	0	0	0	0	0
-7	0	0	0	0	0	0	0	0	0	0	0	0	0	0	0	0	0	0	0	0	0	0	0	0	0	0	0	0	0	0	0	0	0	0	0	0	0	0	0	0	151.607	151.608	0	0	0	0	0	0	0
-5	0	0	0	0	0	0	0	0	0	0	0	0	0	0	0	0	0	0	0	0	0	0	0	0	0	0	0	0	0	0	0	0	0	0	0	0	0	0	0	0	0	0	0	0	0	0	0	0	0
-3	0	0	0	0	0	0	0	0	0	0	0	0	0	0	0	0	0	0	0	0	0	0	0	0	0	0	0	0	0	0	0	0	0	0	0	0	0	0	0	0.0012	302.891	0	0	0	0	0	0	0	0
-1	0	0	0	0	0	0	0	0	0	0	0	0	0	0	0	0	0	0	0	0	0	0	0	0	0	0	0	0	0	0	0	0	0	0	0	0	0	0	0	0.0012	454.315	0	0	0	0	0	0	0	0
1	0	0	0	0	0	0	0	0	0	0	0	0	0	0	0	0	0	0	0	0	0	0	0	0	0	0	0	0	0	0	0	0	0	0	0	0	0	0	0	0	0	0	0	0	0	302.846	0	0	0
3	0	0	0	0	0	0	0	0	0	0	0	0	0	0	0	0	0	0	0	0	0	0	0	0	0	0	0	0	0	0	0	0	0	0	0	0	0	0	0	0	0	0	227.066	378.443	75.6886	681.472	0	151.377	530.026
5	0	0	0	0	0	0	0	0	0	0	0	0	0	0	0	0	0	0	0	0	0	0	0	0	0	0	0	0	0	0	0	0	0	0	0	0	0	0	0	0	0	151.563	227.343	681.565	681.565	227.343	0	605.784	151.562
7	0	0	0	0	0	0	0	0	0	0	0	0	0	0	0	0	0	0	0	0	0	0	0	0	0	0	0	0	0	0	0	0	0	0	0	0	0	0	0	0	0	0	75.8044	681.588	757.23	454.012	454.012	454.338	0
9	0	0	0	0	0	0	0	0	0	0	0	0	0	0	0	0	0	0	0	0	0	0	0	0	0	0	0	0	0	0	0	0	0	0	0	0	0	0	302.683	303.1	0	0	75.6183	227.274	605.575	757.23	681.611	75.8277	0
11	0	0	0	0	0	0	0	0	0	0	0	0	0	0	0	0	0	0	0	0	0	0	0	0	0	0	0	0	0	0	0	0	0	0	0	0	0	151.703	302.892	0	0	0	75.5943	75.5943	530.447	227.555	151.703	0	0
13	0	0	0	0	0	0	0	0	0	0	0	0	0	0	0	0	0	0	0	0	0	0	0	0	0	0	0	0	0	0	0	0	0	0	0	0	377.852	1288.36	454.033	0	0	0	0	0	0	0	0	0	0
15	0	0	0	0	0	0	0	0	0	0	0	0	0	0	0	0	0	0	0	0	0	0	0	0	0	0	0	0	0	0	0	0	0	0	75.5452	681.329	757.23	757.23	454.693	0	0	0	0	0	0	0	0	0	0
17	0	0	0	0	0	0	0	0	0	0	0	0	0	0	0	0	0	0	0	0	0	0	0	0	0	0	0	0	0	0	0	755.212	453.531	756.423	1138.87	379.624	151.849	0	0	0	0	0	0	0	0	0	0	0	0
19	0	0	0	0	0	0	0	0	0	754.949	0	0	0	0	0	0	0	0	0	0	0	0	0	0	0	0	0	0	0	0	757.23	1361.19	605.328	606.24	0	302.892	681.279	75.4949	0	0	227.857	227.85	151.446	757.23	151.902	151.902	0	0	0
21	0	0	0	0	0	0	0	0	0	0	0	0	0	0	0	0	0	0	0	0	0	0	0	0	0	0	0	0	0	151.954	1817.86	757.23	1214.11	151.446	0	151.954	455.354	151.446	0	0	1511.93	2276.76	0	0	0	0	0	0	0
23	0	0	0	0	0	0	0	0	0	0	0	0	0	0	0	0	0	0	0	0	0	0	0	0	0	0	0	0	0	754.421	1665.34	152.008	1660.85	0	0	0	0	0	760.039	912.049	760.033	0	0	0	0	0	0	0	0
25	0	0	0	0	0	0	0	0	0	0	0	0	0	0	0	0	0	0	0	0	0	0	0	0	0	0	0	0	603.936	3482.03	152.062	0	835.724	75.415	0	0	0	0	0	452.489	0	0	0	0	0	0	0	0	0
27	0	0	0	0	0	0	0	0	0	0	0	0	0	0	0	0	0	0	0	0	0	0	0	0	0	0	0	0	2271.69	2429.19	150.773	0	454.338	151.446	0	0	0	0	376.932	1895.43	0	0	0	0	0	0	0	0	0
29	0	0	0	0	0	0	0	0	0	0	0	0	0	0	0	0	0	0	0	0	0	0	0	0	0	0	0	0	2271.69	909.409	753.561	604.316	1360.08	906.474	150.712	904.273	0	0	455.805	1970.26	0	0	0	0	0	0	0	0	0
31	0	0	0	0	0	0	0	0	0	0	0	0	0	0	0	0	0	0	0	0	0	0	0	0	0	2267.72	0	753.255	1893.47	981.616	2568.22	2577.76	1366.19	2577.76	3481.67	3481.67	3183.55	2580.94	1363.01	2271.68	0	0	0	0	0	0	0	0	0
33	0	0	0	0	0	0	0	0	0	0	0	0	0	0	0	0	0	0	0	0	0	0	0	0	376.474	1137.99	0	1514.46	2723.46	1965.37	2276.83	757.23	757.23	1366.44	3786.15	1363.01	1660.76	1058.41	757.23	1975.66	752.938	0	0	0	0	0	0	0	0
35	0	0	0	0	0	0	0	0	0	0	0	0	0	0	0	0	0	0	0	0	0	0	0	752.592	3184.08	3786.15	1959.52	2580.15	3485.11	2875.62	757.23	1058.27	757.23	1366.72	2578.29	757.23	1366.72	1359.3	1359.3	757.234	1664.05	1208.78	0	0	0	0	0	0	0
37	0	0	0	0	0	0	0	0	0	0	0	0	0	0	0	0	0	0	0	0	0	0	376.125	1591.68	2800.26	2657.77	2729.01	3786.15	2414.17	3786.15	757.23	757.23	757.23	757.23	1671.88	1663.91	757.23	757.23	2269.7	2261.73	2269.7	1966.8	0	0	0	0	0	0	0
39	0	0	0	0	0	0	0	0	0	0	0	0	0	0	0	0	0	0	0	0	0	0	903.33	1818.42	1589.65	3404.86	1895.75	3105.18	3786.15	3786.15	757.23	757.23	757.23	757.23	757.23	757.23	757.23	1367.29	1062.26	3485.4	2273.82	1062.26	751.884	0	0	0	0	0	0
41	0	0	0	0	0	0	0	0	0	0	0	0	0	0	0	0	0	0	0	0	0	0	2271.69	3180.37	1290.16	3109.82	2121.39	3335.26	2119.09	2882.07	757.23	757.23	757.23	757.23	757.23	757.23	757.23	757.23	682.082	1884.46	2260.2	1659.01	1129.52	225.445	0	0	0	0	0
43	0	0	0	0	0	0	0	0	0	0	0	0	0	0	0	0	0	0	0	0	0	0	3035.09	3485.72	1813.65	2271.69	2271.69	2877.47	2572.11	1365.48	1358.08	757.23	757.23	757.23	757.23	757.23	605.784	302.892	682.124	529.445	531.91	682.125	1358.08	604.55	0	0	0	0	0
45	0	0	0	0	0	0	0	0	0	0	0	0	0	0	0	0	0	0	0	0	0	0	1971.44	2574.58	3333.13	3327.85	3636.02	3035.52	1597.45	1281.35	757.23	757.23	757.23	757.23	1368.3	757.23	1881.85	227.829	2278.29	305.54	2564.02	1963.51	2279.62	2869.55	2793.16	2640.4	2640.4	1125.94	0
47	0	0	0	0	0	0	0	0	0	0	0	0	0	0	0	0	0	0	0	0	0	0	2271.69	3480.42	1062.95	3180.37	3486.09	1674.4	757.23	757.23	757.23	757.23	757.23	1357.35	3180.37	2430.22	1910.78	1146.47	3786.15	3786.15	3786.15	3786.15	3480.42	2868.98	3786.15	3786.15	0	764.311	0
49	0	0	0	0	0	0	0	0	0	0	0	0	0	0	0	0	0	0	0	0	0	749.63	3021.32	3786.15	3174.29	3786.15	2580.66	757.23	757.23	757.23	757.23	757.23	757.23	1356.93	3786.15	3786.15	1889.27	2638.9	3786.15	3786.15	3786.15	3786.15	3786.15	3786.15	3786.15	2286.89	1514.46	0	1522.07
51	0	0	0	0	0	0	0	0	0	0	0	0	0	0	0	0	0	0	0	0	757.231	3037.08	2737.45	2261.9	3786.15	1656.11	1369.54	757.23	757.23	757.23	757.23	1356.49	2255.38	2867.68	3786.15	3786.15	3786.15	1522.62	1148.08	1913.47	1530.77	3028.93	3786.15	3786.15	3786.15	3786.15	3786.15	3020.76	1872.68
53	0	0	0	0	0	0	0	0	0	0	0	0	0	0	0	0	0	0	374.23	374.232	2254.15	3786.15	3786.15	3786.15	2880.98	3479.75	1968.8	757.23	1655.38	2254.15	1812.09	3037.69	1888.69	3403.15	3786.15	3786.15	3786.15	757.23	0	0	2271.7	3786.15	3786.15	3786.15	3786.15	3020.15	3037.69	3786.15	3786.15
55	0	0	0	0	0	0	0	747.788	0	0	0	0	0	0	0	0	0	0	373.894	1869.47	3786.15	3786.15	3786.15	3786.15	3786.15	3786.15	3105.59	3105.59	2271.69	3786.15	2636.14	3402.81	3786.15	3786.15	3786.15	2290.57	766.671	0	0	0	383.341	3412.26	2664.47	2664.47	2655.02	2655.02	1150.01	1916.68	1533.34
57	0	0	0	0	0	0	0	0	0	0	0	0	0	0	0	0	0	747.061	1130.76	1898.16	2655.39	1120.59	1524.63	3786.15	3786.15	3786.15	3039.09	3018.75	1898.16	1918.5	2665.56	3412.62	3786.15	3039.09	0	0	0	0	0	0	0	0	0	0	2271.69	3018.75	0	0	0
59	0	0	0	0	0	0	0	0	1119.36	373.119	0	1492.48	0	0	0	0	0	0	2271.69	3017.93	3402.04	2633.82	3017.93	3786.15	3039.91	3039.91	2282.68	2260.7	746.238	768.221	768.221	3028.92	2666.79	1152.33	0	0	0	0	0	0	0	0	0	0	0	0	0	0	0
61	0	0	0	0	0	0	0	745.308	2271.69	3017	1514.46	2259.77	745.308	769.152	769.152	745.308	2247.84	3786.15	3786.15	3786.15	3040.84	3040.84	3017	3786.15	3786.15	3040.84	2295.53	3786.15	3786.15	3040.84	769.152	1538.3	769.152	0	0	0	0	0	0	0	0	0	0	0	0	0	0	0	0
63	0	0	0	0	0	0	385.099	2643.82	3401.05	3401.05	3401.05	1886.59	770.198	1540.4	1501.49	3786.15	3015.95	3786.15	3786.15	3786.14	372.132	1860.65	3786.15	3786.15	3786.15	3786.15	3414.02	385.099	1540.4	0	0	0	0	0	0	0	0	0	0	0	0	0	0	0	0	0	0	0	0
65	0	0	0	0	0	771.394	1157.09	1128.76	1885.99	2657.39	3786.15	3786.15	3043.08	3786.15	3014.76	3786.15	771.393	743.067	1857.67	1857.67	3014.76	3786.15	3414.62	1928.48	3786.15	3786.15	771.393	0	0	0	0	0	0	0	0	0	0	0	0	0	0	0	0	0	0	0	0	0	0
67	0	0	0	0	0	0	0	0	2240.55	2302.83	2302.83	3786.15	3786.15	3786.15	3415.32	1900.86	2240.55	1530.03	3415.32	3415.32	3786.15	3786.15	1514.46	0	1932	386.398	0	0	0	0	0	0	0	0	0	0	0	0	0	0	0	0	0	0	0	0	0	0	0
69	0	0	0	0	0	0	0	0	0	0	0	0	0	0	1161.66	1161.66	0	0	774.441	1548.88	0	0	0	0	0	0	0	0	0	0	0	0	0	0	0	0	0	0	0	0	0	0	0	0	0	0	0	0	0
71	0	0	0	0	0	0	0	0	0	0	0	0	0	0	0	0	0	0	0	0	0	0	0	0	0	0	0	0	0	0	0	0	0	0	0	0	0	0	0	0	0	0	0	0	0	0	0	0	0
73	0	0	0	0	0	0	0	0	0	0	0	0	0	0	0	0	0	0	0	0	0	0	0	0	0	0	0	0	0	0	0	0	0	0	0	0	0	0	0	0	0	0	0	0	0	0	0	0	0
75	0	0	0	0	0	0	0	0	0	0	0	0	0	0	0	0	0	0	0	0	0	0	0	0	0	0	0	0	0	0	0	0	0	0	0	0	0	0	0	0	0	0	0	0	0	0	0	0	0
77	0	0	0	0	0	0	0	0	0	0	0	0	0	0	0	0	0	0	0	0	0	0	0	0	0	0	0	0	0	0	0	0	0	0	0	0	0	0	0	0	0	0	0	0	0	0	0	0	0
79	0	0	0	0	0	0	0	0	0	0	0	0	0	0	0	0	0	0	0	0	0	0	0	0	0	0	0	0	0	0	0	0	0	0	0	0	0	0	0	0	0	0	0	0	0	0	0	0	0
81	0	0	0	0	0	0	0	0	0	0	0	0	0	0	0	0	0	0	0	0	0	0	0	0	0	0	0	0	0	0	0	0	0	0	0	0	0	0	0	0	0	0	0	0	0	0	0	0	0
83	0	0	0	0	0	0	0	0	0	0	0	0	0	0	0	0	0	0	0	0	0	0	0	0	0	0	0	0	0	0	0	0	0	0	0	0	0	0	0	0	0	0	0	0	0	0	0	0	0
85	0	0	0	0	0	0	0	0	0	0	0	0	0	0	0	0	0	0	0	0	0	0	0	0	0	0	0	0	0	0	0	0	0	0	0	0	0	0	0	0	0	0	0	0	0	0	0	0	0
87	0	0	0	0	0	0	0	0	0	0	0	0	0	0	0	0	0	0	0	0	0	0	0	0	0	0	0	0	0	0	0	0	0	0	0	0	0	0	0	0	0	0	0	0	0	0	0	0	0
89	0	0	0	0	0	0	0	0	0	0	0	0	0	0	0	0	0	0	0	0	0	0	0	0	0	0	0	0	0	0	0	0	0	0	0	0	0	0	0	0	0	0	0	0	0	0	0	0	0
[truncated: 95 more columns]
