# Supplementary material for: Advances in representing interactive methane in ModelE2-YIBs(version 1.1)
Source: Copernicus journal article supplement (doi:10.5194/gmd-2018-85), 2018-05-18
Supplement: Supplementary file [file gmd-2018-85-AC4-supplement.pdf]

## **Response to Reviewer #2**

We thank the reviewer for their thoughtful comments. Here, the reviewer's comments are shown in boldfaced black text, and our responses are shown in non-boldfaced blue text. The page and line numbers to which we refer in our responses correspond to the updated manuscript (the comments of both reviewers are taken into account in this updated manuscript).

### **Overview**

**This paper describes advances to the NASA GISS ModelE2-Yale Interactive terrestrial Biosphere global chemistry-climate model (ModelE2-YIBs) and its use to optimise natural methane emission sources for the year 2005, through comparison of modelled and observed surface atmospheric methane concentrations. These emission inventories and the overall model performance are then assessed against atmospheric column methane measurements from the SCIAMACHY satellite instrument and ozone sonde measurements.**

**The Global Methane cycle continues to be a topic of much current interest. Methane is policy-relevant; it has the second largest radiative forcing after carbon dioxide and methane mitigation is an attractive option in achieving the warming targets of the Paris Climate Agreement. The cited synthesis papers of Kirschke et al. [2013] and Saunio et al. [2016] both conclude that there is still significant uncertainty in the magnitude, temporal trends and spatial distributions of the different methane sources and sinks. The papers also highlight a significant gap between the total methane emissions derived from aggregating bottom-up, largely process-based estimates and the top-down estimates derived from atmospheric measurements.**

**With the uncertainty in the methane emission source terms, many chemistry-climate and Earth System models prescribe the surface atmospheric methane concentrations. The use of an interactive methane scheme (i.e. driven with surface methane emission and removal processes) is welcome, while technically challenging. Methane is relatively long-lived in terms of tropospheric chemistry, making it both sensitive to and affecting the hydroxyl radical concentrations. Thus successful modelling of methane needs a robust description of OH; a 1% change in OH concentration is equivalent to ~ 5 Tg CH<sub>4</sub> yr<sup>-1</sup> change in methane emissions.**

We fully agree with the reviewer's comments.

- 1. This is a limited study in that emission inventories and the model evaluation are for a single year (2005) and the derived inventories may be specific to the ModelE2-YIBs. It would have been more interesting to consider the inventories and model performance over a longer period (e.g., 2000-2014) covering both the period of near-zero growth between 2000 and 2006 and the renewed growth from 2007 onwards.**

Please see response to Reviewer #1 Point (4). Our approach applies a CCM as a tool for investigating Earth system processes and global climate sensitivity, not a CTM approach (with "correct" reanalysis meteorology) for constraining emission sources. We agree that the derived wetland methane inventory is somewhat specific to ModelE2-YIBs; the other methane sources are derived from published estimates, as described in Sect. 3. A major technical advance is coupling the dynamic methane simulation with the YIBs terrestrial biosphere. This capability allows us to investigate, for instance, the impacts of changes in the terrestrial biosphere on methane and the impacts of anthropogenic methane mitigation on the

terrestrial biosphere, within the context of global climate change. We will apply the framework to examine the full Earth system impacts of mitigating anthropogenic methane emissions. The overall methane inventory is highly relevant to other global models. Interactive methane simulations are computationally expensive and time consuming. When our cluster was operating at peak performance, each 45-year simulation required around 2–3 weeks of run time; actual time from initial submission to simulation completion, accounting for resubmissions of the job and time spent in the simulation queue, was typically several weeks longer than the base run time. Our dataset, optimized for our model, can serve as a useful initial dataset for other models. Starting with a close approximation of prescribed methane fluxes can reduce the computational power and time needed for optimization, perhaps prompting more widespread use of interactive methane schemes in global modeling.

We also agree that the study suggested by the reviewer (examining a longer decadal period 2000–2014, extending to the period of growth in atmospheric methane that occurred after 2007) is an interesting one to consider that is most appropriately tackled using a global CTM approach. In our study, we run time-slice simulations, in which the applied forcing datasets (including the prescribed methane fluxes) are repeated for each model year of the run. We run the simulation long enough to allow methane to achieve a stable concentration. Page 7, Line 25: “Year-to-year variation in the methane burden for the final 10 model years is < 3.2 Tg CH<sub>4</sub>. Year-to-year variation in the global-average surface methane concentration is < 1.3 ppbv.” Our year of interest, 2005, falls within a period when the atmospheric methane concentration was largely stable. We are currently using the optimized methane scheme from this study in time-slice simulations aimed at probing the impacts of anthropogenic methane emission perturbations on atmospheric concentrations of a suite of short-lived climate pollutants. The optimized methane scheme developed in our current study serves as a useful starting point both (1) for optimizing the methane schemes in other models and (2) for setting up transient simulations, in which the prescribed methane emissions evolve over time.

We have made the following updates to the conclusions section (Sect. 6):

(1) We have added the words “time-slice” to the following sentence (Page 26, Line 23): “The improved methane scheme is currently being applied to time-slice chemistry–climate simulations to quantify the methane response and concomitant radiative forcing associated with perturbations in anthropogenic methane emissions.”

(2) We have added to the end of Sect. 6 (Page 26, Line 25): “The gridded natural methane fluxes associated with the optimized methane scheme in ModelE2-YIBs are provided in the Supplemental Information. This dataset can serve as a useful starting point for optimization of the interactive methane schemes in other atmospheric models. Starting with a reasonable approximation of prescribed methane fluxes can reduce the computational power and time needed for optimization in other models, potentially prompting more widespread use of interactive methane schemes in global modeling. The optimized methane inventory developed in this study additionally serves as a useful starting point for a potential follow-up study aimed at optimization for transient simulations, in which the prescribed methane emissions evolve over time.”

Please also see our response to point (1) of Reviewer #1; we have added a description to the paper describing that our derived methane budget represents a 2000s climatology, centered around year 2005.

Although the paper falls in the remit of the journal, there are a number of key issues that need to be addressed before it can be considered for publication.

### Specific Comments

- 2. Model development:** The present model builds on the cited work of (1) Shindell et al. [2013], who described an interactive methane (and ozone) chemistry scheme in the GISS E2 chemistry-climate model, albeit for emissions from 2005 onwards, and (2) Yue and Unger [2015], who developed YIBS v1.0, a dynamic vegetation model for carbon-cycle studies, which also includes ozone-induced vegetation damage and biogenic VOC emissions. The main model development appears to be coupling of the GISS E2 chemistry-climate and YIBS models.

The title of the paper gives the impression that significant advances have been in the representation of an interactive methane chemistry scheme in ModelE2-YIBs. In which case, I would have had many comments about comparing with other OH concentration datasets, using other atmospheric tracers (CO, CO<sub>2</sub>) to constrain specific methane sources. In reality, it seems more limited. The only description of the model developments made in this paper (page 4, line 15) is in relation to the earlier work by Shindell et al. [2013] "this study updates the natural non-wetland methane fluxes; focuses on steady-state methane; applies a different anthropogenic emissions inventory; includes a new land surface model with interactive computation of isoprene and monoterpene emissions; and applies observed ocean boundary conditions". Although these are to some extent secondary to the primarily objective of the interactive methane scheme, there should nonetheless be some discussion as to how these have improved the overall model performance (compared to for example the GISS E2 chemistry-climate model), either in the main paper or as supplementary information. As an example, we are presented with global annual biogenic VOC emission estimates (Table 1, page 8), with no discussion as to how these compare to previous or other estimates (e.g., see Figure 10 in Sindelarova et al., 2014).

The reviewer is correct that a major technical advance is coupling the dynamic methane simulation to the YIBs terrestrial biosphere. Shindell et al. (2013) and the GISS ModelE2 AR5 version use a default GISS land cover dataset and vegetation representation (e.g., Matthews, Global vegetation and land use: New high-resolution data bases for climate studies, J. Clim. Appl. Meteorol., 1983). Yue and Unger (2015) describe the coupling of the YIBs model to the GISS ModelE2 chemistry-climate model (Yue and Unger: The Yale Interactive terrestrial Biosphere model version 1.0: description, evaluation and implementation into NASA GISS ModelE2, Geosci. Model Dev., 2015). The simulations presented in Yue and Unger (2015) were run using prescribed methane concentrations, as opposed to running with interactive methane chemistry and dynamic methane emissions, such as we apply here. The coupling between ModelE2-YIBs and the dynamic methane simulation is not trivial. The new framework will allow us to examine how changes in anthropogenic methane emissions impact the terrestrial biosphere and, in turn, how changes in the terrestrial biosphere impact atmospheric methane.

We have clarified how ModelE2-YIBs version 1.1 relates to YIBs and ModelE2 (Page 5, Line 22; also see point (7) from Reviewer #1): "This paper describes the new version 1.1 of ModelE2-YIBs. ModelE2-YIBs version 1.1 refers to the use of interactive methane chemistry and dynamic methane emissions (including application of the final contemporary natural methane flux inventory described in Sect. 3) within the framework of ModelE2-YIBs version 1.0. ModelE2-YIBs version 1.0 refers to YIBs version 1.0 (Yue and Unger, 2015) coupled to the version of ModelE2 described by Schmidt et al. (2014)."

We have added the Yue and Unger (2015) and Unger et al. (2013) references to this sentence (Page 4, Line 21): “Relative to the Shindell et al. (2013) study, this study updates the natural non-wetland methane fluxes; applies a different anthropogenic emissions inventory; includes a new land surface model with interactive computation of isoprene and monoterpene emissions (Unger et al., 2013; Yue and Unger, 2015); and applies observed ocean boundary conditions.”

- 3. Wetland methane emissions: On page 10, line 19 and Table 2, a total of 140 Tg CH<sub>4</sub> yr<sup>-1</sup> is derived for the global mean emissions from wetlands for the year 2005. Effectively, this is a residual term after specifying all the other methane emission sources.**

Earlier in the paper (page 4, line 5), the authors state "The model-measurement comparison was used to refine the spatial and temporal distribution of methane emissions from wetlands. The second and third steps were repeated, applying the newly optimized wetland emissions to ModelE2-YIBs, until strong model-measurement agreement was achieved". Later on the same page (line 12), "Using ModelE2, Shindell et al. [2013] previously used a similar procedure of modifying the wetland methane source to achieve a modeled methane concentration that is in line with present-day observations, noting that the accuracy of the magnitude of the wetland flux that is derived in this way depends on whether the other prescribed fluxes have been accurately assigned. (Relative to the Shindell et al. [2013] study, this study updates the natural non-wetland methane fluxes ....".

As far as I can tell, there is no further discussion of this optimisation process, what is involved, what is meant by strong agreement and hence how the the emission total of 140 Tg CH<sub>4</sub> yr<sup>-1</sup> is derived. The implication is that the wetland methane emissions are taken from or as used in Shindell et al. [2013]. This should be clarified and the text amended. I note that this optimised wetland emission dataset is provided in the Supplementary Information, as an annual dataset.

For sure, the total is within the range of current estimates (Saunois et al. [2016] is an update of and effectively supersedes Kirschke et al. [2013]). As someone who both derives and uses methane wetland emission datasets, the single annual dataset provided is of little value. We know that wetland methane emissions vary seasonally. I would like to see more information about the dataset, e.g., temporal trends (both seasonally and inter-annually), how do the regional totals compare to those in Table 4 of Saunois et al. [2016]? The wetland model intercomparison of Melton et al. [2013, cited paper] summarised the then state-of-the-art in wetland modelling and the large uncertainty in modelled wetland area and wetland methane emissions. To remove one of the largest areas of uncertainty (in wetland area), the wetland models contributing to the synthesis paper of Saunois et al. [2016] all used the same prescribed spatially and time-varying wetland product (SWAMPS), described in the follow-on paper of Poulter et al. [2017]. How do the wetland areas compare with SWAMPS?

We have expanded both our methodological description and evaluation of the methane fluxes:

(1) In Sect. 2, when we introduce the optimization approach for wetlands, we have added text to point the reader to Sect. 3 for additional information (Page 4, Line 10): “The resulting natural methane emissions inventory is described in Sect. 3, **along with additional details about the optimization process for the wetland methane source.**”

(2) We do not use the wetland methane emissions from the cited Shindell et al. (2013) paper. In Sect. 3, we have added a detailed description of the optimization process used to derive the wetland methane emissions (Page 11, Line 28): “The iterative refinement process used to optimize the wetland methane flux was largely a trial-and-error based methodology that made use of literature-derived estimates and surface observations. The wetland methane flux is calculated as a best fit following prescription of the other fluxes. The baseline wetland methane emissions applied to the optimization process are the methane emissions from bogs and swamps from Fung et al. (1991); the magnitude, spatial distribution, and temporal distribution of these emissions were subsequently modified to varying degrees during the optimization process. At each step of the process, the annual cycle of modeled surface-level methane concentration was compared to observations from the NOAA ESRL measurement network at 50 globally distributed sites (Dlugokencky et al., 2015). The aim of the optimization process was to minimize the absolute value of the normalized mean bias (NMB) at the largest number of sites. Considering the full set of 50 sites, the final optimized scenario results in NMBs ranging from -1.3% (model underestimate) to +3.0% (model overestimate), with a median of +0.4%. At three quarters of sites, the NMB is between -1% and +1%. An evaluation of the simulated atmospheric methane distribution associated with the final optimized emissions inventory, including a comparison to SCIAMACHY methane columns (Schneising et al., 2009), is provided in Sect. 4. Modification of the temporal distribution of wetland methane emissions was guided by both the annual cycles of surface methane concentrations at the 50 NOAA ESRL measurement sites (Dlugokencky et al., 2015) and the annual cycle of wetland methane emissions simulated by the models participating in the WETCHIMP analysis (Melton et al., 2013).

The best fit of modeled atmospheric methane relative to the NOAA ESRL surface methane observations corresponds to the following modification of the baseline wetland methane emissions dataset. First, the baseline wetland methane emissions (extratropical bogs and tropical swamps) from Fung et al. (1991) were scaled to achieve an extratropical emissions fraction of 30% and a prescribed global emission magnitude of about  $130 \text{ Tg CH}_4 \text{ y}^{-1}$ . A single scaling factor was applied in each grid cell in each month to the emissions from bogs; likewise, a separate single scaling factor was applied in each grid cell in each month to the emissions from swamps. For the WETCHIMP study, the mean extratropical emissions fraction among all participating models is about 30% (Melton et al., 2013). Secondly, an additional  $10 \text{ Tg CH}_4 \text{ y}^{-1}$  was added to the wetland methane emissions: (1)  $2 \text{ Tg CH}_4 \text{ y}^{-1}$  was added to  $20^\circ\text{N}$ – $40^\circ\text{N}$  over the months March through September; (2)  $2 \text{ Tg CH}_4 \text{ y}^{-1}$  was added to  $0^\circ$ – $20^\circ\text{N}$  over the months May through October; and (3)  $6 \text{ Tg CH}_4 \text{ y}^{-1}$  was added to  $20^\circ\text{S}$ – $0^\circ$  over all months. Finally, the seasonal cycle of the wetland methane emission hotspots in Finland and Russia ( $50^\circ\text{N}$ – $70^\circ\text{N}$ ) were adjusted:  $0.5 \text{ Tg month}^{-1}$  decrease for each of June, July, and August;  $0.65 \text{ Tg month}^{-1}$  increase in both September and October, and  $0.2 \text{ Tg month}^{-1}$  increase in November.”

(3) At the end of Sect. 3, we have added (1) new Figure 1 (Page 13 and shown below) and (2) information on the seasonal variation of wetland methane emissions (Page 12, Line 32): “The annual cycle of wetland methane emissions is plotted in Fig. 1. Monthly emissions are shown for the same latitudinal zones that are plotted in Melton et al. (2013) for six models participating in the WETCHIMP analysis (their Fig. 6, corresponding to the mean annual cycle for years 1993–2004). Global monthly methane emissions from wetlands range from  $7.4$ – $18.2 \text{ Tg month}^{-1}$  (Fig. 1). Monthly emissions show little variability from November to April (range:  $7.4$ – $9.5 \text{ Tg month}^{-1}$ ), followed by increasing emissions starting in May ( $12.9 \text{ Tg month}^{-1}$ ). Peak monthly emissions occur in July ( $18.2 \text{ Tg month}^{-1}$ ). The six WETCHIMP models simulate peak emissions, variously occurring between June and August, of slightly higher magnitude (approximate range for the six models:  $20$ – $35 \text{ Tg month}^{-1}$ ; Melton et al., 2013). The annual cycle of emissions for the  $40^\circ\text{N}$ – $90^\circ\text{N}$  latitudinal band is similar in shape to that for global emissions, with peak monthly emissions likewise occurring in July ( $9.1 \text{ Tg month}^{-1}$ ; Fig. 1). Monthly

emissions for the 20°N–40°N band show little variation throughout the year and are of low magnitude (range: 0.5–0.9 Tg month<sup>-1</sup>; Fig. 1), while the WETCHIMP models generally exhibit a small peak on the order of 5 Tg month<sup>-1</sup> in this band in the Northern Hemisphere summer (Melton et al., 2013). The 0°–20°N band shows increasing monthly emissions between February and August, followed by declining monthly emissions (Fig. 1). The 20°S–0° band shows the largely opposite cycle, with minimum monthly emissions occurring in August (1.4 Tg month<sup>-1</sup>). Monthly emissions from the tropics, considering 30°S–30°N, are largely consistent throughout the year, ranging from 6.0–8.0 Tg month<sup>-1</sup>.”

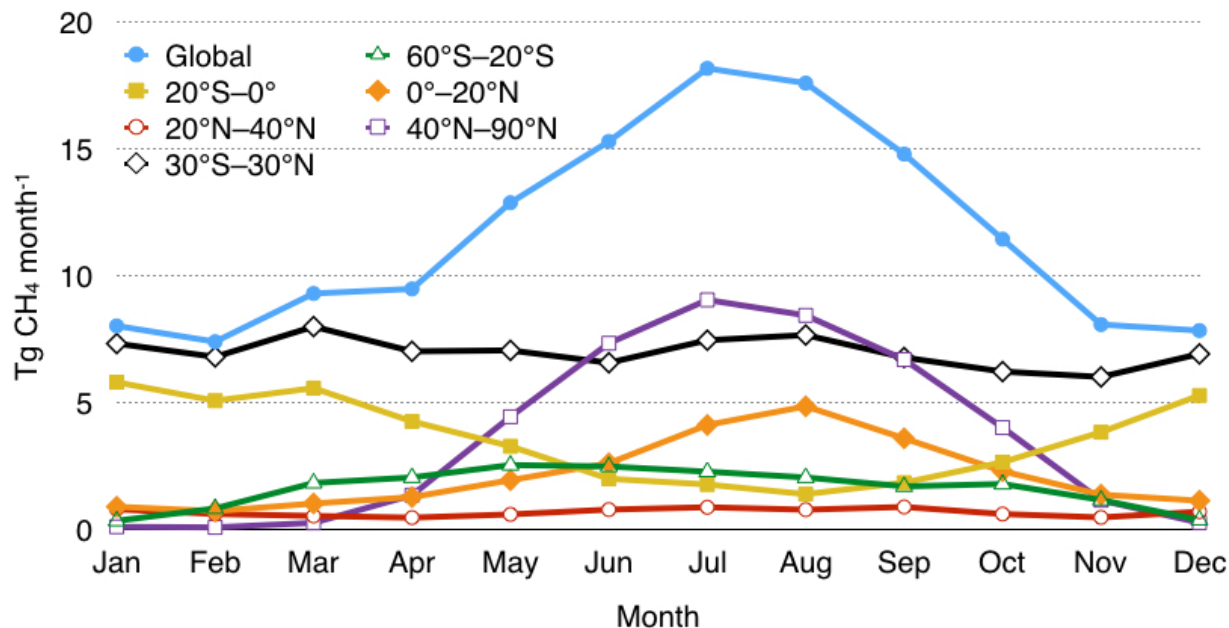

**Figure 1:** Monthly wetland methane emissions (Tg CH<sub>4</sub> month<sup>-1</sup>) for several latitudinal bands for the optimized inventory.

(4) We have also added new Fig. 2 (Page 14 and shown below), new Fig. S1, and more information on the zonal distribution of methane fluxes (Page 14, Line 1): “The zonal distribution of annual wetland methane emissions is shown in Fig. 2, with emissions aggregated over 2°-latitude bands. Peak annual emissions occur near the equator, similar to the WETCHIMP multi-model mean (Melton et al., 2013, their Fig. 5, although shown in 3°-latitude bands). In the Southern Hemisphere, the optimized wetland methane inventory exhibits smaller secondary peaks near 15°S and 30°S. The WETCHIMP multi-model mean likewise exhibits regional peaks in these locations, but the magnitude of the peak at 30°S relative to the peak at the equator is stronger in the optimized inventory than in the WETCHIMP analysis. Like the WETCHIMP multi-model mean, the optimized wetland emissions inventory shows a wide secondary peak centered around 55°N. The secondary peak at 10°N is also seen in the WETCHIMP multi-model mean; in the optimized inventory, this peak exhibits a stronger magnitude relative to the main peak at the equator than occurs in the WETCHIMP analysis. The spatial distributions of the monthly wetland



methane emissions are shown in Fig. S1, and the gridded optimized monthly wetland methane emissions data are provided in the Supplementary Information.”

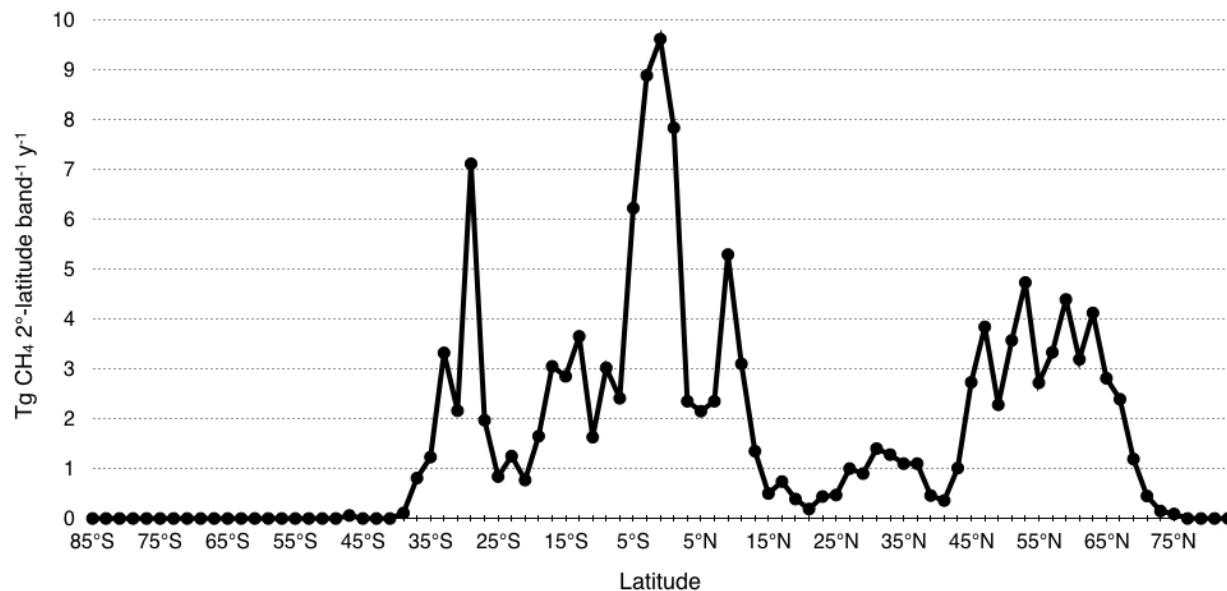

**Figure 2:** Annual zonally summed wetland methane emissions ( $\text{Tg CH}_4 \text{ 2}^\circ\text{-latitude band}^{-1} \text{ y}^{-1}$ ) for the optimized inventory.

(5) We have added new Table 3 (Page 15 and shown below), Fig. S2, and more information regarding the regional distribution of total methane emissions in the optimized inventory (Page 14, Line 18): “Total annual methane emissions from all non-oceanic sources are shown in Table 3 for 14 regions. Regional definitions follow Saunio et al. (2016). In their Table 4, Saunio et al. (2016) provide estimates of annual methane emissions (means for 2000–2009) for the same 14 regions, including both best estimates and ranges resulting from a set of inversions. The regional methane emissions from the optimized inventory fall within the suggested range of Saunio et al. (2016) for nine regions: temperate South America, tropical South America, central North America, boreal North America, southern Africa, northern Africa, Europe, China, and Oceania. For two other regions (contiguous USA and India), the emissions fall within 1–2  $\text{Tg y}^{-1}$  of the suggested range. Emissions in Southeast Asia from the optimized inventory are slightly lower than the range of 54–84  $\text{Tg y}^{-1}$  suggested by Saunio et al. (2016). The optimized inventory exhibits emissions that are higher than the suggested ranges of Saunio et al. (2016) for two regions: (1) Russia (suggested range: 32–44  $\text{Tg y}^{-1}$ ) and (2) Central Eurasia and Japan (suggested range: 38–51  $\text{Tg y}^{-1}$ ). For both regions, the strong emissions in the inventory applied here are associated with strong energy sector emissions and, in the case of Russia, strong wetland emissions. Comparison of simulated column-average methane concentrations with those from SCIAMACHY (Sect. 4.2) shows model underestimates on the order of 2% in these regions, which is typical of model underestimates in other regions. The global distributions of annual methane emissions by source category are shown in Fig. S2.”

(6) We have added the bolded part to this statement (Page 15, Line 11): “The total emission magnitude of methane for 2005 in the ModelE2-YIBs inventory is 532  $\text{Tg y}^{-1}$  (Table 2), which corresponds well to the top-down estimate (548  $\text{Tg y}^{-1}$ , range: 526–569  $\text{Tg y}^{-1}$ ) reported by the Kirschke et al. (2013) review **and**

is only slightly outside of the range from the top-down estimate (552 Tg y<sup>-1</sup>, range: 535–566 Tg y<sup>-1</sup>) reported by the more recent Saunio et al. (2016) review.”

**Table 3:** Regional annual methane emissions from non-oceanic sources (Tg y<sup>-1</sup>). Regional definitions follow Saunio et al. (2016).

| Region                    | Annual methane emissions (Tg y <sup>-1</sup> ) |
|---------------------------|------------------------------------------------|
| Temperate South America   | 23.0                                           |
| Tropical South America    | 70.4                                           |
| Central North America     | 12.1                                           |
| Contiguous USA            | 37.0                                           |
| Boreal North America      | 17.7                                           |
| Southern Africa           | 37.8                                           |
| Northern Africa           | 38.4                                           |
| Europe                    | 30.6                                           |
| Russia                    | 60.7                                           |
| Central Eurasia and Japan | 57.2                                           |
| China                     | 50.5                                           |
| India                     | 26.3                                           |
| Southeast Asia            | 47.4                                           |
| Oceania                   | 17.1                                           |

In the configuration applied in this study, the model assigns methane fluxes from wetlands using gridded input files. Page 7, Line 17: “For most sectors, anthropogenic and natural methane emissions are prescribed in the climate model using global, gridded input files; lake, oceanic, and terrestrial geological methane emissions are internally calculated by the model through prescription of emission factors in the model source code.” That is, the model does not use an interactive wetland scheme, where wetland extent is calculated internally based on climate or other conditions. Neither does the model make use of any type of prescribed wetland extent product. Therefore, we are not able to make any type of comparison with the SWAMPS product (Poulter et al., 2017) mentioned by the reviewer.

In this study, we develop the natural methane flux dataset so that we can apply it to interactive methane model studies aimed at investigating the impacts of anthropogenic methane emission perturbations on atmospheric composition and radiative forcing. Page 4, Line 25: “Planned chemistry–climate simulations that will make use of the natural methane inventory developed here are specifically designed to investigate perturbations in anthropogenic methane emissions.” In such studies, we are interested in the annual-mean impacts. For these studies, we apply the same natural methane fluxes to each model year because we want to isolate the impacts arising only from anthropogenic emissions perturbations. (We do apply monthly varying wetland methane emissions, but the same annual cycle is applied for each model year.) Therefore, we do not apply interannual variation in the wetland methane emissions; rather, we use the consistent 2000s climatology of natural methane fluxes (roughly year 2005) developed here for each model year in those simulations.



- 4. Soil uptake:** Similar comments can be made about the lack of information on the soil uptake of methane. The spatial and temporal distributions given in Fung et al. [1991] are used (Page 7, line 25) and a total uptake of 60 Tg CH<sub>4</sub> yr<sup>-1</sup> is then derived (Table 2, page 9), which appears to influence the derived wetland methane emission estimates (page 10, line 19). This is then compared with and found to be higher than recent estimates (Page 10, lines 27-29). Could not the biome-specific measurements in the cited paper by Dutaur and Verchot not be used to create a new global methane uptake driven with relevant parameters from the land-surface model? More information is needed on how the total was derived.

The reviewer raises an excellent idea for a future PhD project to develop and interrogate the methane soil sink with the few available measurements. In this current work with the global CCM, we assume that the anthropogenic emissions inventory is correct as a starting point.

As described on Page 12, Line 23: “The methane soil sink in the ModelE2-YIBs inventory corresponds to the top end of the range suggested by Dutaur and Verchot (2007) ...” Thus, the soil sink is based on literature values. To be scientifically balanced, we then give additional context, suggesting that other reviews suggest lower methane uptake by soils: “... and is higher than the magnitude reported in recent reviews (e.g., top-down range: 26–42 Tg y<sup>-1</sup>; bottom-up range: 9–47 Tg y<sup>-1</sup>; Kirschke et al., 2013). However, the simulated total atmospheric lifetime of methane and the simulated methane mixing ratio in ModelE2-YIBs are well aligned with observation-based estimates (Sect. 4), suggesting that the overall rate of removal of methane is well represented in the model.” We change “and is higher than” to “but is higher than” to underscore this point.

We have added another two sentences to reiterate that the derived wetland methane emissions depend on the prescribed soil uptake (and also depends on the magnitudes of the other prescribed methane emission sectors, Page 12, Line 25): “The wetland methane emissions are derived as a best fit given the other prescribed emissions, the methane soil sink, and the simulated chemical sink. Applying a weaker soil sink would have resulted in a lower magnitude for the derived wetland methane emissions; applying a stronger soil sink would have resulted in a higher magnitude for the derived wetland methane emissions.”

Please also see response to point (2) from Reviewer #1.

- 5. Emission Maps:** It would have been useful to include maps of the various methane emission sources (and any seasonal cycles) either in the paper or in the Supplementary Information to help interpret Figures 1, 3 and 4.

We have added such plots to the Supplementary Information, as described in our extended analysis in response to point (3) above.

- 6. Model performance against observations:** As presented, the model performance appears impressive, with differences of ~ 1-2% between the modelled and observed methane concentrations (both surface and column). The OH field is considered to be realistic as it gives atmospheric methane lifetimes in agreement with other estimates. That said, there are issues.

The seasonal cycle at surface high latitude southern hemisphere sites is underestimated (Figure 3, pages 14-16). Is this because of the temporal and spatial assumptions made in the natural methane sources? (as well as the cited underestimation of the austral summertime chemical loss). The model fails to capture the annual cycle at a few locations, notably Pallas-Sammaltunturi in Finland; Barrow in Alaska, USA; and Ulaan Uul in Mongolia. This is ascribed to local influences. From Hayman et al. [2014], a similar study using the UK HadGEM2 chemistry-climate model with an interactive methane scheme, it is likely that the Barrow and Pallas-Sammaltunturi sites are (over)influenced by wetland emissions and the Ulaan Uul by other sources.

The model performance is slightly worse against the mean SCIAMACHY atmospheric methane column mixing ratios (XCH<sub>4</sub>) (page 16, section 4.2). In their comparison, Hayman et al. (2014) also found that the HadGEM2 chemistry-climate model underestimated the observed SCIAMACHY XCH<sub>4</sub>, because the modelled CH<sub>4</sub> concentration fell off too rapidly with altitude (note the model configuration used a tropospheric chemistry scheme with an additional first-order loss process for methane to represent stratospheric methane chemistry, unlike the case here). It might not be a chemical problem (of sources and sinks) but potentially atmospheric dynamics and transport. This could be tested using other satellite CH<sub>4</sub> products which are more sensitive to the upper troposphere and lower stratosphere (e.g., TES, IASI).

We have added:

(1) Page 18, Line 4: “The model–measurement differences in annual cycles might also be associated with the temporal and spatial assumptions made in the prescribed methane emissions inventory.”

(2) Page 18, Line 9: “Based on interactive methane simulations with the HadGEM2 chemistry–climate model, Hayman et al. (2014) likewise found model–measurement discrepancies in the annual cycles at these (and other) sites, finding that, in their simulations, the Barrow and Pallas-Sammaltunturi sites are strongly influenced by emissions from wetlands, while the Ulaan Uul site is influenced by other non-wetland emission sources.”

(3) Page 22, Line 14: “Using interactive methane simulations in the HadGEM2 chemistry–climate model, Hayman et al. (2014) likewise found that the model underestimated column-averaged methane concentrations relative to SCIAMACHY observations due to simulated methane concentrations that decreased too rapidly with increasing altitude. The HadGEM2 simulations applied an explicit methane loss term to represent stratospheric methane oxidation (Hayman et al., 2014), while ModelE2 uses fully coupled dynamic stratospheric chemistry (e.g., Shindell et al., 2006).”

(4) Page 22, Line 20 (added bolded portion): “The model slightly overestimates annual-mean surface methane at 80 % of the NOAA ESRL measurement locations and underestimates column-averaged methane at most locations on the globe. This mis-match could indicate that the principal chemical sink of methane – reaction with OH – is slightly too strong in the model outside of the surface layer, **or it could indicate potential issues with the transport mixing rate of methane in the free troposphere and stratosphere. Future work with other vertically resolved satellite data products may help unravel the chemical and/or dynamical causes.** Overall, the model shows good agreement with measured methane mixing ratios, providing confidence in its ability to simulate the principal chemical and dynamical processes that affect methane in the atmosphere.”

- 7. VOC speciation (page 5, line 8):** The chemical scheme has explicit representations of methane, isoprene, and formaldehyde, "while other hydrocarbons are represented using a lumped scheme (Houweling et al., 1998) that is based on the Carbon Bond Mechanism-4 (Gery et al., 1989) and the Regional Atmospheric Chemistry Model (Stockwell et al., 1997)". No information is given on how the non-methane VOC emissions are attributed to the model VOCs. Presumably, the existing NMVOC speciation is used.

We have added the bolded statements (Page 5, Line 12): "The troposphere includes standard NO<sub>x</sub>-O<sub>x</sub>-HO<sub>x</sub>-CO-CH<sub>4</sub> chemistry; methane, isoprene, **monoterpenes (as α-pinene)**, and formaldehyde are explicitly represented in the model, while other hydrocarbons are represented using a lumped scheme (Houweling et al., 1998) that is based on the Carbon Bond Mechanism-4 (Gery et al., 1989) and the Regional Atmospheric Chemistry Model (Stockwell et al., 1997). **More recent updates to the chemical mechanism are described by Shindell et al. (2006, 2013). The alkane and alkene lumped hydrocarbon classes used in the ModelE2-YIBs chemical mechanism are calculated from the total NMVOC emissions from the prescribed emissions scenario (described in Sect. 2.2) by applying spatially explicit alkane-to-total-NMVOC and alkene-to-total-NMVOC ratios from the RCP8.5 inventory (Riahi et al., 2011) for year 2005.**"

- 8. Initialisation and Runtime:** Nothing is said about how the model runs were initialised nor about runtime and platforms.

To describe the atmospheric methane distribution defined at initialization, we added (Page 7, Line 13): "For simulations using the interactive methane scheme in ModelE2, the atmospheric methane distribution at initialization is defined through application of a vertical gradient, derived from HALOE observations (e.g., Russell et al., 1993), to prescribed hemispheric-mean surface methane concentrations (Dlugokencky et al., 2015)."

And on Page 6, Line 12: "The simulations were performed on the Omega cluster at the Yale Center for Research Computing (<https://research.computing.yale.edu/support/hpc/clusters/omega>). Omega is a 704-node 5632-core cluster based on the Intel Nehalem nodes and equipped with 36GB of RAM per node, a QDR Infiniband interconnect, and a high-speed Lustre DDN file system for parallel I/O. When the cluster was operating at peak performance, NASA ModelE2-YIBs had a runtime of 8–10 model days per hour using 88 processors."

## **9. Code availability**

The source code for ModelE2-YIBs (version 1.1) is available on request to the authors.

Included in the Supplementary Information as a zipped file are the natural methane emission and methane soil sink datasets, as gridded annual averages. I see little value in these as currently provided as several of the sources (e.g., wetlands) have strong seasonal variations. The EXCEL spreadsheet

format should be converted into a non-proprietary format, e.g., flat text (such as comma separated variable) or more usefully netCDF or similar.

We now use .csv files for all of the datasets included as part of the Supplementary Information, and we now provide the wetland methane emissions at monthly resolution.

#### Technical comments

10. Page 2, Line 27: "principle sink" should be "principal sink"

Fixed.

#### References

Dlugokencky, E.J., Lang, P.M., Crotwell, A.M., Masarie, K.A., and Crotwell, M.J.: Atmospheric Methane Dry Air Mole Fractions from the NOAA ESRL Carbon Cycle Cooperative Global Air Sampling Network, 1983–2014, Version 2015-08-03, 2015, data path: [ftp://aftp.cmdl.noaa.gov/data/trace\\_gases/ch4/flask/surface/](ftp://aftp.cmdl.noaa.gov/data/trace_gases/ch4/flask/surface/)

Dutaur, L. and Verchot, L.V.: A global inventory of the soil CH<sub>4</sub> sink, *Global Biogeochem. Cy.*, 21, GB4013., doi: 10.1029/2006GB002734, 2007.

Fung, I., John, J., Lerner, J., Matthews, E., Prather, M., Steele, L.P., and Fraser, P.J.: Three-dimensional model synthesis of the global methane cycle, *J. Geophys. Res.*, 96, 13,033-13,065, doi: 10.1029/91JD01247, 1991.

Gery, M.W., Whitten, G.Z., Killus, J.P., and Dodge, M.C.: A photochemical kinetics mechanism for urban and regional scale computer modeling, *J. Geophys. Res.*, 94, 12,925–12,956, doi: 10.1029/JD094iD10p12925, 1989.

Hayman, G.D., O'Connor, F.M., Dalvi, M., Clark, D.B., Gedney, N., Huntingford, C., Prigent, C., Buchwitz, M., Schneising, O., Burrows, J.P., Wilson, C., Richards, N., and Chipperfield, M.: Comparison of the HadGEM2 climate-chemistry model against in situ and SCIAMACHY atmospheric methane data, *Atmos. Chem. Phys.*, 14, 13257–13280, doi:10.5194/acp-14-13257-2014, 2014.

Houweling, S., Dentener, F., and Lelieveld, J.: The impact of nonmethane hydrocarbon compounds on tropospheric photochemistry, *J. Geophys. Res.*, 103, 10,673–10,696, doi: 10.1029/97JD03582, 1998.

Kirschke, S., Bousquet, P., Ciais, P., Saunoy, M., Canadell, J.G., Dlugokencky, E.J., Bergamaschi, P., Bergmann, D., Blake, D.R., Bruhwiler, L., Cameron-Smith, P., Castaldi, S., Chevallier, F., Feng, L., Fraser, A., Heimann, M., Hodson, E.L., Houweling, S., Josse, B., Fraser, P.J., Krummel, P.B., Lamarque, J.-F., Langenfelds, R.L., Le Quéré, C., Naik, V., O'Doherty, S., Palmer, P.I., Pison, I., Plummer, D., Poulter, B., Prinn, R.G., Rigby, M., Ringeval, B., Santini, M., Schmidt, M., Shindell, D.T., Simpson, I.J., Spahni, R., Steele, L.P., Strode, S.A., Sudo, K., Szopa, S., van der Werf, G.R., Voulgarakis, A., van Weele, M., Weiss,

R.F., Williams, J.E., and Zeng, G.: Three decades of global methane sources and sinks, *Nat. Geosci.*, 6, 813–823, doi: 10.1038/ngeo1955, 2013.

Matthews, E.: Global vegetation and land use: New high-resolution data bases for climate studies, *J. Clim. Appl. Meteorol.*, 22, 474–487, doi: 10.1175/1520-0450(1983)022<0474:GVALUN>2.0.CO;2, 1983.

Melton, J.R., Wania, R., Hodson, E.L., Poulter, B., Ringeval, B., Spahni, R., Bohn, T., Avis, C.A., Beerling, D.J., Chen, G., Eliseev, A.V., Denisov, S.N., Hopcroft, P.O., Lettenmaier, D.P., Riley, W.J., Singarayer, J.S., Subin, Z.M., Tian, H., Zürcher, S., Brovkin, V., van Bodegom, P.M., Kleinen, T., Yu, Z.C., and Kaplan, J.O.: Present state of global wetland extent and wetland methane modelling: Conclusions from a model inter-comparison project (WETCHIMP), *Biogeosciences*, 10, 753–788, doi: 10.5194/bg-10-753-2013, 2013.

Poulter, B., Bousquet, P., Canadell, J.G., Ciais, P., Peregon, A., Saunio, M., Arora, V.K., Beerling, D.J., Brovkin, V., Jones, C.D., Joos, F., Gedney, N., Ito, A., Kleinen, T., Koven, C.D., McDonald, K., Melton, J.R., Peng, C., Peng, S., Prigent, C., Schroeder, R., Riley, W.J., Saito, M., Spahni, R., Tian, H., Taylor, L., Viovy, N., Wilton, D., Wiltshire, A., Xu, X., Zhang, B., Zhang, Z., and Zhu, Q.: Global wetland contribution to 2000–2012 atmospheric methane growth rate dynamics, *Env. Res. Lett.*, 12, 094013, doi: 10.1088/1748-9326/aa8391, 2017.

Riahi, K., Rao, S., Krey, V., Cho, C., Chirkov, V., Fischer, G., Kindermann, G., Nakicenovic, N., and Rafaj, P.: RCP 8.5—A scenario of comparatively high greenhouse gas emissions, *Climatic Change*, 109, 33–57, doi: 10.1007/s10584-011-0149-y, 2011.

Russell III, J.M., Gordley, L.L., Park, J.H., Drayson, S.R., Hesketh, W.D., Cicerone, R.J., Tuck, A.F., Frederick, J.E., Harries, J.E., and Crutzen, P.J.: The Halogen Occultation Experiment, *J. Geophys. Res.*, 98, 10,777–10,797, doi: 10.1029/93JD00799, 1993.

Saunio, M., Bousquet, P., Poulter, B., Peregon, A., Ciais, P., Canadell, J.G., Dlugokencky, E.J., Etiope, G., Bastviken, D., Houweling, S., Janssens-Maenhout, G., Tubiello, F.N., Castaldi, S., Jackson, R.B., Alexe, M., Arora, V.K., Beerling, D.J., Bergamaschi, P., Blake, D.R., Brailsford, G., Brovkin, V., Bruhwiler, L., Crevoisier, C., Crill, P., Covey, K., Curry, C., Frankenberg, C., Gedney, N., Höglund-Isaksson, L., Ishizawa, M., Ito, A., Joos, F., Kim, H.-S., Kleinen, T., Krummel, P., Lamarque, J.-F., Langenfelds, R., Locatelli, R., Machida, T., Maksyutov, S., McDonald, K.C., Marshall, J., Melton, J.R., Morino, I., Naik, V., O’Doherty, S., Parmentier, F.-J.W., Patra, P.K., Peng, C., Peng, S., Peters, G.P., Pison, I., Prigent, C., Prinn, R., Ramonet, M., Riley, W.J., Saito, M., Santini, M., Schroeder, R., Simpson, I.J., Spahni, R., Steele, P., Takizawa, A., Thornton, B.F., Tian, H., Tohjima, Y., Viovy, N., Voulgarakis, A., van Weele, M., van der Werf, G.R., Weiss, R., Wiedinmyer, C., Wilton, D.J., Wiltshire, A., Worthy, D., Wunch, D., Xu, X., Yoshida, Y., Zhang, B., Zhang, Z., Zhu, Q.: The global methane budget 2000–2012, *Earth Syst. Sci. Data*, 8, 697–751, doi: 10.5194/essd-8-697-2016, 2016.

Schmidt, G.A., Kelley, M., Nazarenko, L., Ruedy, R., Russell, G.L., Aleinov, I., Bauer, M., Bauer, S.E., Bhat, M.K., Bleck, R., Canuto, V., Chen, Y.-H., Cheng, Y., Clune, T.L., Del Genio, A., de Fainchtein, R., Faluvegi, G., Hansen, J.E., Healy, R.J., Kiang, N.Y., Koch, D., Lacis, A.A., LeGrande, A.N., Lerner, J., Lo, K.K., Matthews, E.E., Menon, S., Miller, R.L., Oinas, V., Olosio, A.O., Perlwitz, J.P., Puma, M.J., Putman, W.M., Rind, D., Romanou, A., Sato, M., Shindell, D.T., Sun, S., Syed, R.A., Tausnev, N., Tsigaridis, K., Unger, N., Voulgarakis, A., Yao, M.-S., and Zhang, J.: Configuration and assessment of the GISS ModelE2 contributions to the CMIP5 archive, *J. Adv. Model. Earth Sy.*, 6, 141–184, doi: 10.1002/2013MS000265, 2014.

Schneising, O., Buchwitz, M., Burrows, J.P., Bovensmann, H., Bergamaschi, P., and Peters, W.: Three years of greenhouse gas column-averaged dry air mole fractions retrieved from satellite - Part 2: Methane, *Atmos. Chem. Phys.*, 9, 443–465, doi: 10.5194/acp-9-443-2009, 2009.

Shindell, D.T., Faluvegi, G., Unger, N., Aguilar, E., Schmidt, G.A., Koch, D.M., Bauer, S.E., and Miller, R.L.: Simulations of preindustrial, present-day, and 2100 conditions in the NASA GISS composition and climate model G-PUCCINI, *Atmos. Chem. Phys.*, 6, 4427–4459, doi: 10.5194/acp-6-4427-2006, 2006.

Shindell, D.T., Pechony, O., Voulgarakis, A., Faluvegi, G., Nazarenko, L., Lamarque, J.-F., Bowman, K., Milly, G., Kovari, B., Ruedy, R., and Schmidt, G.A.: Interactive ozone and methane chemistry in GISS-E2 historical and future climate simulations, *Atmos. Chem. Phys.*, 13, 2653–2689, doi: 10.5194/acp-13-2653-2013, 2013.

Sindelarova, K., Granier, C., Bouarar, I., Guenther, A., Tilmes, S., Stavrakou, T., Müller, J.-F., Kuhn, U., Stefani, P., and Knorr, W.: Global data set of biogenic VOC emissions calculated by the MEGAN model over the last 30 years, *Atmos. Chem. Phys.*, 14, 9317–9341, doi:10.5194/acp-14-9317-2014, 2014.

Stockwell, W.R., Kirchner, F., Kuhn, M., and Seefeld, S.: A new mechanism for regional atmospheric chemistry modeling, *J. Geophys. Res.*, 102, 25,847–25,879, doi: 10.1029/97JD00849, 1997.

Unger, N., Harper, K., Zheng, Y., Kiang, N.Y., Aleinov, I., Arneth, A., Schurgers, G., Amelynck, C., Goldstein, A., Guenther, A., Heinesch, B., Hewitt, C.N., Karl, T., Laffineur, Q., Langford, B., McKinney, K.A., Misztal, P., Potosnak, M., Rinne, J., Pressley, S., Schoon, N., and Serça, D.: Photosynthesis-dependent isoprene emission from leaf to planet in a global carbon–chemistry–climate model, *Atmos. Chem. Phys.*, 13, 10243–10269, doi: 10.5194/acp-13-10243-2013, 2013.

Yue, X. and Unger, N.: The Yale Interactive terrestrial Biosphere model version 1.0: Description, evaluation and implementation into NASA GISS ModelE2, *Geosci. Model Dev.*, 8, 2399–2417, doi: 10.5194/gmd-8-2399-2015, 2015.
